# Supplementary material for: Novel fleximer pyrazole-containing adenosine analogues: chemical, enzymatic and highly efficient biotechnological synthesis
Source: Royal Society of Chemistry journal article supplement (doi:10.1039/d1ob01069g), 2021-01-01
Supplement: d1ob01069g1.pdf [file d1ob01069g1.pdf]

## Supplementary Material

### NOVEL FLEXIMER PYRAZOLE-CONTAINING ADENOSINE ANALOGUES: CHEMICAL AND HIGHLY-EFFICIENT BIOTECHNOLOGICAL SYNTHESIS

Anastasia Khandazhinskaya<sup>1</sup>, Barbara Eletskaia<sup>2</sup>, Ilja Fateev<sup>2</sup>, Maria Kharitonova<sup>2</sup>, Irina Konstantinova<sup>2</sup>, Vladimir Barai<sup>3</sup>, Alex Azhayev<sup>3</sup>, Mervi T. Hyvonen<sup>4</sup>, Tuomo A. Keinanen<sup>4</sup>, Sergey Kochetkov<sup>1</sup>, Katherine Seley-Radtke<sup>5\*</sup>, Alex Khomutov<sup>1</sup>, Elena Matyugina<sup>1\*</sup>

<sup>1</sup>Engelhardt Institute of Molecular Biology of the Russian Academy of Sciences, 32 Vavilov St., Moscow 119991, Russia

<sup>2</sup>Shemyakin-Ovchinnikov Institute of Bioorganic Chemistry, Russian Academy of Sciences, Moscow 117997, Russia

<sup>3</sup>Metkinen Chemistry OY, Mikrokatu 1, FI-70210 Kuopio, Finland

<sup>4</sup>School of Pharmacy, Biocenter Kuopio, University of Eastern Finland, Kuopio Campus, P.O. Box 1627 Kuopio, FI-70211 Finland

<sup>5</sup>Department of Chemistry & Biochemistry, University of Maryland, Baltimore County, 1000 Hilltop Circle, Baltimore, MD 21250, USA

\* corresponding author

#### Table of Content

|                                                                                                                                                              |     |
|--------------------------------------------------------------------------------------------------------------------------------------------------------------|-----|
| Table S1                                                                                                                                                     | S2  |
| Figure S1                                                                                                                                                    | S3  |
| Characterization data of products                                                                                                                            | S4  |
| Nucleoside phosphorylase activity                                                                                                                            | S14 |
| HPLC data                                                                                                                                                    | S15 |
| <sup>1</sup> H and <sup>13</sup> C NMR, spectra of compounds <b>8-10</b>                                                                                     | S21 |
| <sup>1</sup> H, <sup>13</sup> C NMR, <sup>1</sup> H- <sup>13</sup> C HSQC and superimposed <sup>1</sup> H- <sup>15</sup> N spectra of compounds <b>11-16</b> | S27 |
| <sup>1</sup> H and <sup>13</sup> C NMR, spectra of compounds <b>17-22</b>                                                                                    | S57 |

**Table S1** Experimental data for the enzymatic synthesis of  $\beta$ -D-ribonucleosides (**11-13**)<sup>a</sup> and  $\beta$ -D-2'-deoxyribosides(**14-16**)

| Comp.     | Acceptor  | Donor | Volume, mL<br>10 mM<br>KH <sub>2</sub> PO <sub>4</sub> | Substrates       |       |                 |       | Enzymes              |             |                       |             | Conversion after 24 h (HPLC data), % | Final conversion (HPLC data), % | Yield (%), (mg) purity    |
|-----------|-----------|-------|--------------------------------------------------------|------------------|-------|-----------------|-------|----------------------|-------------|-----------------------|-------------|--------------------------------------|---------------------------------|---------------------------|
|           |           |       |                                                        | Acceptor         |       | Donor           |       | PNP,                 |             | UP,                   |             |                                      |                                 |                           |
|           |           |       |                                                        | g (mmol)         | C, mM | g (mmol)        | C, mM | e.u.(A) <sup>b</sup> | e.u./mL     | e.u. (B) <sup>b</sup> | e.u./mL     |                                      |                                 |                           |
| <b>11</b> | <b>8</b>  | Urd   | <b>156</b>                                             | 0.05<br>(0.312)  | 2     | 0.152<br>(0.62) | 4     | <b>167</b><br>(535)  | <b>1.07</b> | <b>73</b><br>(118)    | <b>0.47</b> | 46                                   | 74                              | 30<br>(29)<br><b>99.7</b> |
| <b>12</b> | <b>9</b>  |       | <b>62</b>                                              | 0.020<br>(0.125) | 2.02  | 0.061<br>(0.25) | 4     | <b>18.6</b><br>(149) | <b>0.3</b>  | <b>49.6</b><br>(198)  | <b>0.8</b>  | 69                                   | 96                              | 44<br>(16)<br><b>91.2</b> |
| <b>13</b> | <b>10</b> |       | <b>62</b>                                              | 0.020<br>(0.125) | 2.02  | 0.061<br>(0.25) | 4     | <b>18.6</b><br>(149) | <b>0.3</b>  | <b>49.6</b><br>(198)  | <b>0.8</b>  | 44                                   | 99                              | 55<br>(20)<br><b>95.8</b> |
| <b>14</b> | <b>8</b>  | dUrd  | <b>156</b>                                             | 0.05<br>(0.312)  | 2     | 0.142<br>(0.62) | 4     | <b>167</b><br>(535)  | <b>1.07</b> | <b>73</b><br>(198)    | <b>0.47</b> | 81                                   | 99                              | 51<br>(22)<br><b>98.3</b> |
| <b>15</b> | <b>9</b>  |       | <b>62</b>                                              | 0.020<br>(0.125) | 2.02  | 0.057<br>(0.25) | 4     | <b>18.6</b><br>(149) | <b>0.3</b>  | <b>49.6</b><br>(198)  | <b>0.8</b>  | 95                                   | 98                              | 52<br>(18)<br><b>95.2</b> |
| <b>16</b> | <b>10</b> |       | <b>62</b>                                              | 0.020<br>(0.125) | 2.02  | 0.057<br>(0.25) | 4     | <b>18.6</b><br>(149) | <b>0.3</b>  | <b>49.6</b><br>(198)  | <b>0.8</b>  | 89                                   | 100                             | 64<br>(22)<br><b>95.1</b> |

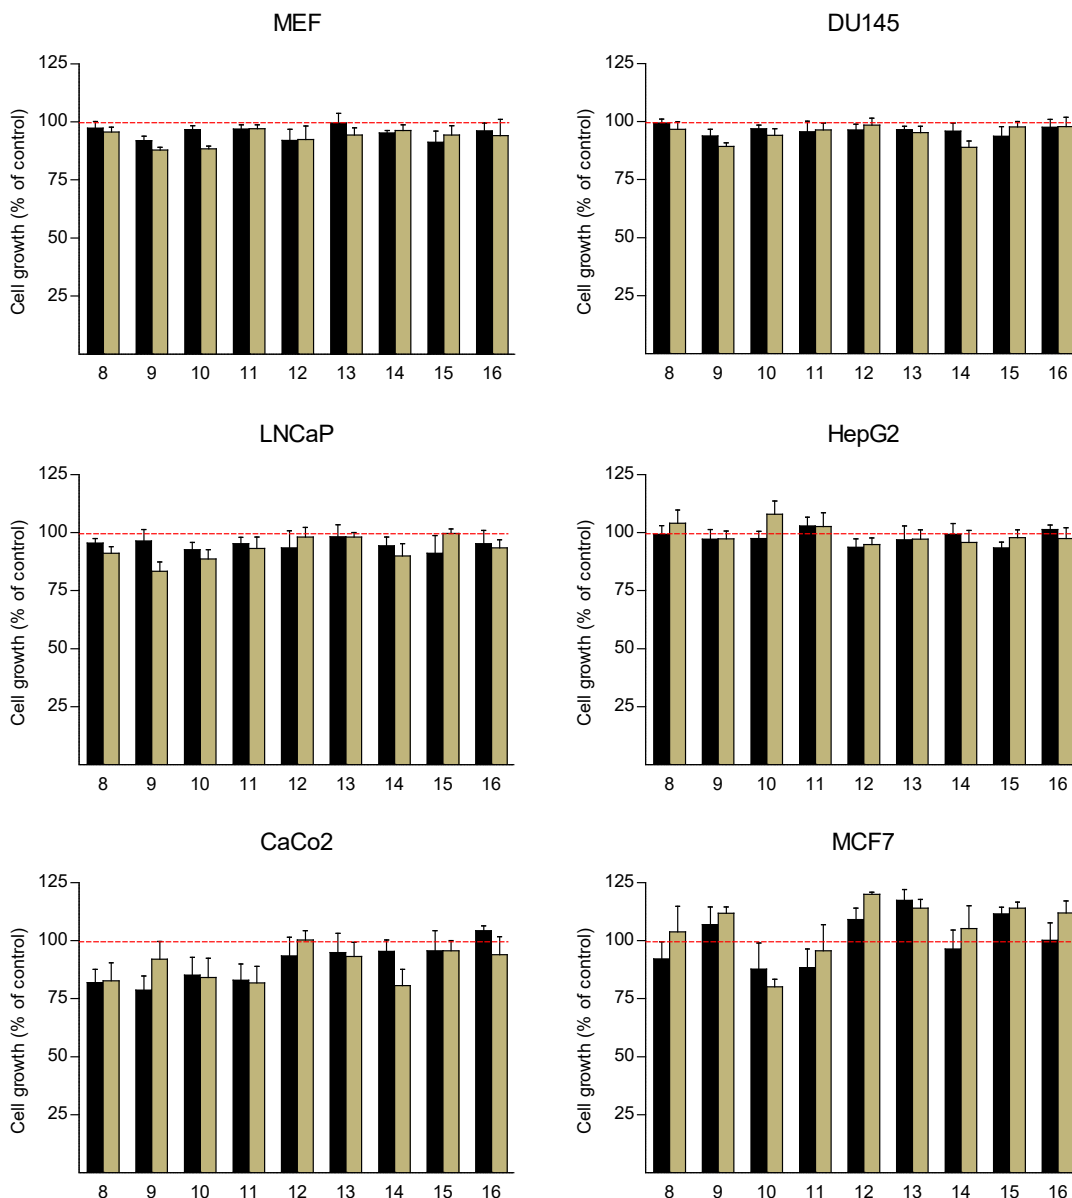

**Figure S1.** Effect of flexible bases **8-10** and nucleoside analogues **11-16** on the growth of five different human cancer cell lines and non-cancer mouse embryonic fibroblasts (MEF). The cells were treated for 3 days in medium supplemented with 10 μM (black bars) or 100 μM (green bars) compounds and analyzed for resazurin proliferative index. The data are means ± S.D., n=6.

## CHARACTERIZATION DATA OF PRODUCTS

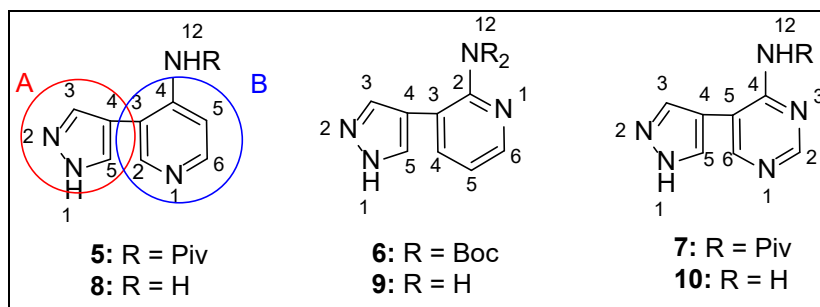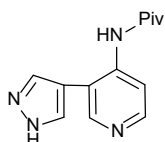

**4-(4-Pivaloylamino)pyridin-3-yl)-1H-pyrazole (5).** Compound **5** was synthesized from 3-bromo-4-pivaloylamino pyridine **2** (1.3 g, 3.3mmol) and 4-(4,4,5,5-tetramethyl-1,3,2-dioxoboran-2-yl)-1H-pyrazole **1** (850 mg, 3.3mmol). After purification on a silica gel column eluting with chloroform:methanol (95:5), **5** was obtained as a white powder (550 mg, 69%). <sup>1</sup>H NMR (300.1 MHz, DMSO-*d*<sub>6</sub>) δ: 13.19 (1H, s, NH-A), 8.76 (1H, s, H-2B), 8.59 (1H, s, H-5A), 8.38 (1H, d *J* = 5.4 Hz, H-6B), 8.45-8.47 (1H, s, H-3A), 7.84 (1H, s, NH-B), 7.76 (1H, d *J* = 5.5 Hz, H-5B), 1.20 (9H, s, Piv). <sup>13</sup>C NMR (75.5 MHz, DMSO-*d*<sub>6</sub>) δ: 176.5 (C(O)), 150.0 (C-2B), 147.9 (C-6B), 141.9 (C-4B), 137.9 (C-3A), 127.6 (C-5A), 122.0 (C-3B), 118.0 (C-5B), 114.0 (C-4A), 38.6 (C-(CH<sub>3</sub>)<sub>3</sub>), 26.7 (3C, (CH<sub>3</sub>)<sub>3</sub>).

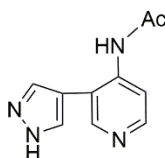

**4-(4-Acetylamino)pyridin-3-yl)-1H-pyrazole.** Was synthesized and purified in a similar manner as compounds **5** from 3-bromo-4-acetylamino pyridine (540 mg; 2.5 mmol) and 4-(4,4,5,5-tetramethyl-1,3,2-dioxoboran-2-yl)-1H-pyrazole **1** (645 mg, 2.5mmol) with 30% yield. <sup>1</sup>H NMR (300.1 MHz, DMSO-*d*<sub>6</sub>) δ: 13.13 (1H, br s, NH-A), 9.33 (1H, s, H-2B), 8.58 (1H, s, H-5A), 8.33 (1H, d *J* = 5.5 Hz, H-6B), 8.14 (1H, br s, H-3A), 7.84 (1H, br s, NH-B), 7.75 (1H, d *J* = 5.5 Hz, H-5B), 1.20 (3H, s, Ac). <sup>13</sup>C NMR (75.5 MHz, DMSO-*d*<sub>6</sub>) δ: 169.2 (C(O)), 150.0 (C-2B), 147.6 (C-6B), 141.5 (C-4B), 137.6 (C-3A), 127.6 (C-5A), 121.2 (C-3B), 118.0 (C-5B), 114.1 (C-4A), 23.7 (C, CH<sub>3</sub>).

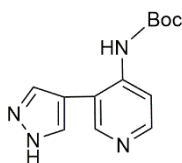

**4-(4-*tert*-Butyloxycarbonylamino)pyridin-3-yl)-1H-pyrazole.** Was synthesized and purified in a similar manner as compounds **5** from 3-bromo-4-*tert*-butyloxycarbonylamino pyridine (740 mg; 2.7mmol) and 4-(4,4,5,5-tetramethyl-1,3,2-dioxoboran-2-yl)-1H-pyrazole **1** (690mg, 2.7mmol) with 33% yield. <sup>1</sup>H NMR (400 MHz, CDCl<sub>3</sub>) δ: 8.43 (1H, d, *J* = 5.8 Hz, H-6B), 8.36 (1H, s, H-2B), 8.15 (1H, d, *J* = 5.8 Hz, H-5B), 7.75 (2H, s, H-3A, H-5A), 6.88 (1H, s, NH-B), 1.49 (9H, s, Boc). <sup>13</sup>C NMR (100.6 MHz, CDCl<sub>3</sub>) δ: 151.9 (C(O)), 150.4 (C-2B), 149.7 (C-6B), 143.6 (C-4B), 133.6 (C-3A), 116.8 (C-5A), 114.3 (C-3B), 112.2 (C-5B), 82.0 (C-4A), 29.7 (C-(CH<sub>3</sub>)<sub>3</sub>), 28.1 (3C, (CH<sub>3</sub>)<sub>3</sub>).

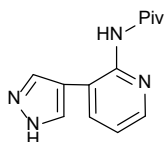

**4-(2-Pivaloylamino)pyridin-3-yl)-1H-pyrazole (6).** Compound was synthesized starting from 3-bromo-2-pivaloylamino pyridine **3** (590 mg, 2.3 mmol) and 4-(4,4,5,5-tetramethyl-1,3,2-dioxoboran-2-yl)-1H-pyrazole **1** (450 mg, 2.3 mmol). After purification on a silica gel column using chloroform: methanol (95:5) system for elution, the yield of compound **6** as white powder was 72% (400 mg). <sup>1</sup>H NMR (300.1 MHz, CD<sub>3</sub>OD) δ: 8.38 (1H, dd, *J* = 4.8, 1.8 Hz, H-5A), 7.99 (1H, dd, *J* = 7.7, 1.8 Hz, H-6B), 7.86 (2H, s, H-3A, H-4B), 7.41 (1H, dd, *J* = 7.7, 4.8 Hz, H-5B), 1.27 (9H, s, Piv). <sup>13</sup>C NMR (75.5 MHz, CD<sub>3</sub>OD) δ: 178.7 (C(O)), 147.4 (C-2B), 145.8 (C-4B), 138.2 (C-5B, C-6B), 126.9 (C-3B), 122.5 (C-3A, C-5A), 116.6 (C-4A), 38.2 (C-(CH<sub>3</sub>)<sub>3</sub>), 25.7 (3C, (CH<sub>3</sub>)<sub>3</sub>).

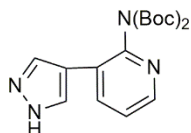

**4-(2-(bis(tert-Butyloxycarbonyl)amino)pyridin-3-yl)-1H-pyrazole.** Was synthesized starting from 3-bromo-2-di-tert-butylloxycarbonylamino pyridine (860 mg, 2.3 mmol) and 4-(4,4,5,5-tetramethyl-1,3,2-dioxoboran-2-yl)-1H-pyrazole **1** (446 mg; 2.3 mmol). After purification on a silica gel column using chloroform: methanol (95:5) system for elution, the yield of compound as white powder was 56% (460mg). <sup>1</sup>H NMR (300.1 MHz, CDCl<sub>3</sub>) δ: 8.45 (1H, dd, *J* = 4.7, 1.8 Hz, H-5A), 7.9 (1H, dd, *J* = 7.7, 1.9 Hz, H-6B), 7.82 (2H, s, H-3A, H-4B), 7.33 (1H, ddd, *J* = 7.7, 4.7, 0.7 Hz, H-5B), 1.29 (18H, s, Boc<sub>2</sub>). <sup>13</sup>C NMR (75.5 MHz, CDCl<sub>3</sub>) δ: 150.8 (2×C(O)), 148.8 (C-2B), 146.9 (C-4B), 137.0 (C-6B), 132.6 (C-5B), 126.9 (C-3B), 123.5 (C-3A, C-5A), 117.0 (C-4A), 83.1 (2×C, C(CH<sub>3</sub>)<sub>3</sub>), 27.7 (6C, 2×(CH<sub>3</sub>)<sub>3</sub>).

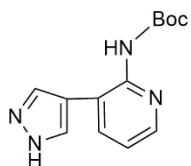

**4-(2-tert-Butyloxycarbonylamino)pyridine-3-yl)-1H-pyrazole.** The title compound was obtained together with compound **6** and the same purification procedure gave the product as white powder with 27% (160 mg) yield. <sup>1</sup>H NMR (300.1 MHz, CDCl<sub>3</sub>) δ: 8.47 (1H, dd, *J* = 4.7, 1.9 Hz, H-5A), 7.84 (2H, s, H-3A, H-4B), 7.66 (1H, dd, *J* = 7.6, 1.9 Hz, H-6B), 7.11 (1H, dd, *J* = 7.6, 4.9 Hz, H-5B), 1.47 (s, 9H, Boc). <sup>13</sup>C NMR (75.5 MHz, CDCl<sub>3</sub>) δ: 152.0 (C(O)), 148.5 (C-2B), 146.7 (C-4B, C-6B), 132.9 (C-5B), 120.2 (C-3B), 119.8 (C-3A, C-5A), 116.7 (C-4A), 81.2 (C-(CH<sub>3</sub>)<sub>3</sub>), 28.2 (3C, (CH<sub>3</sub>)<sub>3</sub>).

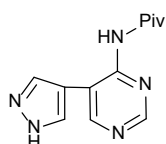

**4-(4-Pivaloylamino)pyrimidin-5-yl)-1H-pyrazole (7).** Was synthesized starting from 4-pivaloylamino-5-bromopyrimidine **4** (550 mg, 2.8 mmol) and 4-(4,4,5,5-tetramethyl-1,3,2-dioxoboran-2-yl)-1H-pyrazole **1** (722 mg; 2.8 mmol). Was purified on a silica gel column using chloroform: methanol (98:2) to (95:5) system for elution and obtained as white powder with 74% (515mg) yield. <sup>1</sup>H NMR (300.1 MHz, DMSO-*d*<sub>6</sub>) δ: 13.09 (1H, s, NH-A), 9.79 (1H, s, NH-B), 8.94 (1H, s, H-2B), 8.90 (1H, s, H-6B), 8.09 (1H, s, H-5A), 7.82 (1H, s, H-3A), 1.20 (9H, s, Piv). <sup>13</sup>C NMR (75.5 MHz, DMSO-*d*<sub>6</sub>) δ: 176.9 (C(O)), 157.4 (C-2B), 156.1 (C-6B), 155.5 (C-4B), 137.9 (C-3A), 127.8 (C-5A), 123.7 (C-5B), 114.2(C-4A), 40.9 (C-(CH<sub>3</sub>)<sub>3</sub>), 27.31 (3C, (CH<sub>3</sub>)<sub>3</sub>).

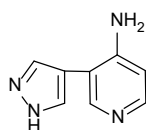

**4-(4-Aminopyridin-3-yl)-1H-pyrazol (8).** Was obtained from **5** (500 mg, 2 mmol) by reflux in methanol with K<sub>2</sub>CO<sub>3</sub> (360 mg, 2.6 mmol) during 12 h. Purification on a silica gel column using chloroform: methanol (8:2) system for elution gave the product **8** as white powder with 84% (275 mg) yield. <sup>1</sup>H NMR (300.1 MHz, DMSO-*d*<sub>6</sub>) δ: 8.14 (1H, s, H-2B), 7.94 (1H, d, *J* = 5.6 Hz, H-6B), 7.89

(2H, s, H-3A, H-5A), 6.68 (1H, d,  $J = 5.7$  Hz, H-5B), 5.93 (2H, s, NH<sub>2</sub>). <sup>13</sup>C NMR (75.5 MHz, DMSO-*d*<sub>6</sub>)  $\delta$ : 151.9 (C-4B), 148.4 (C-2B), 147.0 (C-6B), 132.6 (C-3A, C-5A), 115.1 (C-3B), 114.0 (C-4A), 109.88 (C-5B). HRMS  $m/z$ : calculated for C<sub>8</sub>H<sub>8</sub>N<sub>4</sub> [M+H]<sup>+</sup> 161.0822; found [M+H]<sup>+</sup> 161.0822; UV:  $\lambda_{\max}$  285 ( $\epsilon$  6700).

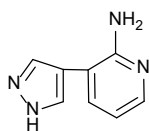

**4-(2-Aminopyridin-3-yl)-1H-pyrazole (9).** Was obtained from **6** (350 mg, 1.4 mmol) by reflux in methanol with K<sub>2</sub>CO<sub>3</sub> (250 mg, 1.8 mmol) during 15 h. The solvent was removed *in vacuo* and the residue was purified on a silica gel column using chloroform: methanol (8:2) system for elution to give the product **9** as pale-yellow powder with 71% (160 mg) yield. <sup>1</sup>H NMR (300.1 MHz, DMSO-*d*<sub>6</sub>)  $\delta$  13.01 (1H, s, NH), 8.01 (1H, br s, H-5A), 7.88 (1H, dd,  $J = 4.9, 1.8$  Hz, H-6B), 7.80 (1H, br s, H-3A), 7.50 (1H, dd,  $J = 7.4, 1.8$  Hz, H-4B), 6.62 (1H, dd,  $J = 7.4, 4.9$  Hz, H-5B), 5.56 (2H, s, NH<sub>2</sub>). <sup>13</sup>C NMR (75.5 MHz, DMSO-*d*<sub>6</sub>)  $\delta$ : 156.8 (C-6B), 146.21 (C-2B), 138.0 (C-3A), 136.5 (C-4B), 127.0 (C-5A), 117.5 (C-3B), 113.6 (C-5B), 113.1 (C-4A). HRMS  $m/z$ : calculated for C<sub>8</sub>H<sub>8</sub>N<sub>4</sub> [M+H]<sup>+</sup> 161.0822; found [M+H]<sup>+</sup> 161.0833.  $\lambda_{\max}$  310 ( $\epsilon$  4800).

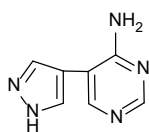

**4-(4-Aminopyrimidin-5-yl)-1H-pyrazole (10).** Was synthesized starting from **7** (275mg, 1.1mmol) by reflux in methanol with K<sub>2</sub>CO<sub>3</sub> (193 mg, 1.4 mmol) during 12 h. Purification on a silica gel column using chloroform: methanol (9:1) to (8:2) system for elution gave product **10** as white powder with 69% (120 mg) yield. <sup>1</sup>H NMR (300 MHz, DMSO-*d*<sub>6</sub>)  $\delta$ : 13.11 (1H, s, NH), 8.30 (1H, s, H-2B), 8.18 (1H, s, H-5A), 8.07 (1H, s, H-6B), 7.80 (1H, s, H-3A), 6.58 (2H, s, NH<sub>2</sub>). <sup>13</sup>C NMR (75.5 MHz, DMSO-*d*<sub>6</sub>)  $\delta$ : 160.8 (C-4B), 156.7 (C-2B), 153.7 (C-6B), 137.9 (C-3A), 127.4 (C-5A), 113.7 (C-5B), 110.6 (C-4A). HRMS  $m/z$ : calculated for C<sub>7</sub>H<sub>7</sub>N<sub>5</sub> [M+H]<sup>+</sup> 162.0774 found [M+H]<sup>+</sup> 162.0774; UV:  $\lambda_{\max}$  289 ( $\epsilon$  8000).

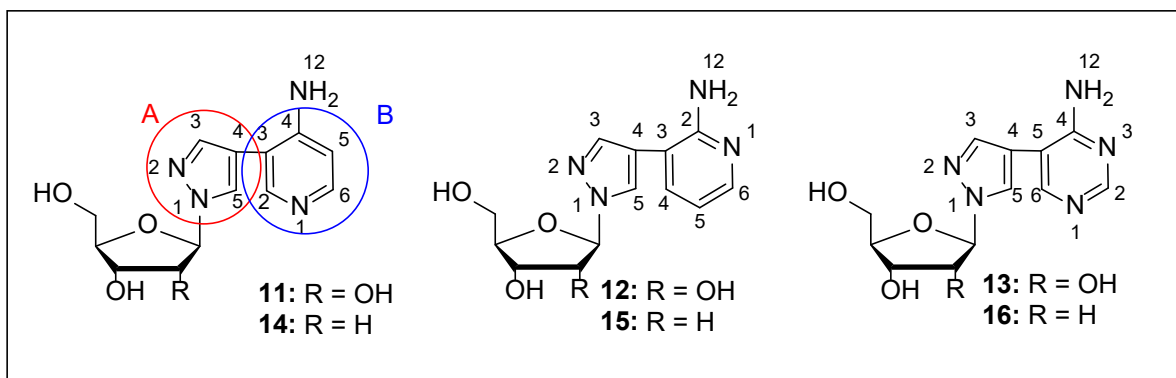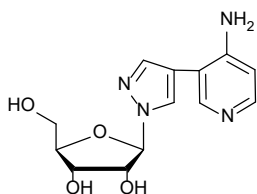

**1-( $\beta$ -D-Ribofuranosyl)-4-(4-aminopyridin-3-yl)pyrazole (11).**

The reaction mixture (31.2 mL in total) contained 60 mM uridine (457 mg), 20 mM **8** (100 mg), 30 mM potassium phosphate buffer pH 7.0, 50  $\mu$ g of *E. coli* cells overexpressing recombinant UP (dry weight, 54 units of activity), 65 mg of *E. coli* cells overexpressing recombinant PNP (dry weight, 15730 units of activity). The reaction mixture was stirred 24 h at 57 °C until the

yield of the product in reaction mixture reached 90% according to RP HPLC, buffer for the elution contained 1% acetonitrile. The reaction mixture was applied on 45 mL of Dowex-1x8 resin (HO<sup>-</sup>). The resin was thoroughly washed with water (400 mL). Fleximer **11** was eluted with 60% ethanol. The eluent was evaporated to dryness *in vacuo* to give 80 mg of 95% pure (RP HPLC) **11**. The residue was dissolved in water (100 mL) and applied onto the column (2.7 x 180 mm) of reverse phase Chromatorex C18 (100Å, 20-45 µm; Fuji Silysia Chemical Ltd). The reverse phase was washed with 10% acetonitrile (250 mL) and the target product was eluted with 20% acetonitrile. The solution was evaporated to dryness *in vacuo* and the residue was thoroughly dried in high *vacuo* to give 51 mg (28%) of **11** as white powder.

<sup>1</sup>H NMR (600.2 MHz, D<sub>2</sub>O, TSP) δ: 8.21, (1 H, s, H-5A), 8.06 (1 H, s, H-2B), 8.00 (1 H, d, *J* = 7.0, H-6B), 7.89 (1 H, s, H-3A), 6.97 (1 H, d, *J* = 7.0, H-5B), 5.91 (1 H, d, *J* = 5.2, H-1'), 4.68 (1 H, t, *J* = 5.2, H-2'), 4.39 (1 H, t, *J* = 4.8, H-3'), 4.23-4.18 (1 H, m, H-4'), 3.85 (1 H, dd, *J* = 12.6, 3.4, Ha-5'), 3.75 (1 H, dd, *J* = 12.6, 5.2, Hb-5'). <sup>13</sup>C NMR (150.9 MHz, D<sub>2</sub>O, TSP) δ: 159.3 (C-4B), 141.7 (C-2B), 139.7 (C-6B), 139.2 (C-3A), 131.7 (C-5A), 114.5 (C-3B), 114.1 (C-4A), 110.3 (C-5B), 93.5 (C-1'), 85.8 (C-4'), 75.0 (C-2'), 71.1 (C-3'), 62.3 (C-5'). <sup>15</sup>N NMR (71 MHz, DMSO-*d*<sub>6</sub>) δ: 303.97 (N2), 279.58 (N1), 222.72 (N1), 67.79 (6-NH<sub>2</sub>). λ<sub>max</sub> 273 (ε 5500). HRMS *m/z*: calculated for C<sub>13</sub>H<sub>16</sub>O<sub>4</sub>N<sub>4</sub> [M+H]<sup>+</sup> 293.1244; found [M+H]<sup>+</sup> 293.1197.

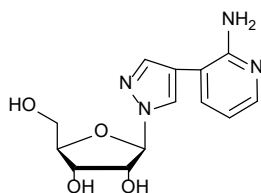

#### 1-(β-D-Ribofuranosyl)-4-(2-aminopyridin-3-yl)pyrazole (**12**).

The reaction mixture (13.5 mL in total) contained 60 mM Uridine (198 mg), 20 mM **9** (43.3 mg), 30 mM potassium phosphate buffer pH 7.0, 13.5 µg of *E. coli* cells overexpressing recombinant UP (dry weight, 14.7 units of activity), 13.5 mg of *E. coli* cells overexpressing recombinant PNP (dry weight, 3267 units of activity). The reaction mixture was stirred 7 h at 57 °C until the yield of the product in reaction mixture reached 95.4% according to RP HPLC, buffer for the elution contained 10% acetonitrile. The reaction mixture was applied on 25 mL of Dowex-1x8 resin (HO<sup>-</sup>). The resin was thoroughly washed with water (300 mL). Fleximer **12** was eluted with 60% ethanol. The eluent was evaporated to dryness *in vacuo* and the residue was thoroughly dried in high *vacuo* to give 36 mg (45.6%) of **12** as white powder.

<sup>1</sup>H NMR (600.2 MHz, D<sub>2</sub>O, TSP) δ: 8.13, (1 H, s, H-5A), 7.95 (1 H, dd, *J* = 5.1, 1.5, H-6B), 7.89 (1 H, s, H-3A), 7.60 (1 H, dd, *J* = 7.4, 1.7, 1H, H-4B), 6.89 (1 H, dd, *J* = 7.4, 5.2, H-5B), 5.90 (1 H, d, *J* = 5.2, H-1'), 4.67 (1 H, t, *J* = 5.2, H-2'), 4.41 (1 H, dd, *J* = 4.8, 5.0, H-3'), 4.24-4.18 (1 H, m, H-4'), 3.87 (1 H, dd, *J* = 12.6, 3.5, Ha-5'), 3.77 (1 H, dd, *J* = 12.6, 5.2, Hb-5'). <sup>13</sup>C NMR (150.9 MHz, D<sub>2</sub>O, TSP) δ: 156.7 (C-6B), 146.7 (C-2B), 141.4 (C-3A), 139.7 (C-4B), 130.4 (C-5A), 119.2 (C-3B), 116.1 (C-5B), 114.6 (C-4A), 93.4 (C-1'), 85.6 (C-4'), 74.9 (C-2'), 71.1 (C-3'), 62.3 (C-5'). <sup>15</sup>N NMR (71 MHz, DMSO-*d*<sub>6</sub>) δ 303.54 (N2), 270.63 (N1), 222.20 (N1), 76.22 (6-NH<sub>2</sub>). λ<sub>max</sub> 305 (ε 5800). HRMS *m/z*: calculated for C<sub>13</sub>H<sub>16</sub>O<sub>4</sub>N<sub>4</sub> [M+H]<sup>+</sup> 293.1244; found [M+H]<sup>+</sup> 293.1241.

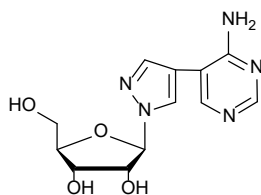

#### 1-β-D-Ribofuranosyl-4-(4-aminopyrimidin-5-yl)pyrazole (**13**).

The reaction mixture (60 mL in total) contained 60 mM Uridine (908 mg), 20 mM **10** (210 mg), 30 mM potassium phosphate buffer pH 7.0, 60 µg of *E. coli* cells overexpressing recombinant UP (dry weight, 65.4 units of activity), 62 mg of *E. coli* cells

overexpressing recombinant PNP (dry weight, 14520 units of activity). The reaction mixture was stirred 10 h at 57 °C until the yield of the product in reaction mixture reached 98% according to RP HPLC, buffer for the elution contained 5% acetonitrile. The reaction mixture was applied on 80 mL of Dowex-1x8 resin (HO<sup>-</sup>). The resin was thoroughly washed with water (1200 mL). Fleximer **13** was eluted with 60% ethanol. The eluent was evaporated *in vacuo* to dryness and the residue was thoroughly dried in high *vacuo* to give 205 mg (53.8%) of **13** as white powder.

<sup>1</sup>H NMR (600.2 MHz, D<sub>2</sub>O, TSP) δ: 8.35, (1 H, s, H-2B), 8.17 (1 H, s, H-5A), 8.13 (1 H, s, H-6B), 7.89 (1 H, s, H-3A), 5.91 (1 H, d, *J* = 5.2, H-1'), 4.68 (1 H, t, *J* = 5.2, H-2'), 4.41 (1 H, dd, *J* = 4.8, 5.0, H-3'), 4.24-4.19 (1 H, m, H-4'), 3.87 (1 H, dd, *J* = 12.6, 3.5, Ha-5'), 3.77 (1 H, dd, *J* = 12.6, 5.2, Hb-5'). <sup>13</sup>C NMR (150.9 MHz, D<sub>2</sub>O, TSP) δ: 162.1 (C-4B), 157.1 (C-2B), 154.2 (C-6B), 141.3 (C-3A), 130.9 (C-5A), 115.5 (C-5B), 111.3 (C-4A), 93.4 (C-1'), 85.7 (C-4'), 74.9 (C-2'), 71.1 (C-3'), 62.3 (C-5'). <sup>15</sup>N NMR (71 MHz, DMSO-*d*<sub>6</sub>) δ: 304.05 (N2), 261.38 (N3), 249.97 (N1), 223.24 (N1), 83.27 (6-NH<sub>2</sub>). λ<sub>max</sub> 285 (ε 5200). HRMS *m/z*: calculated for C<sub>12</sub>H<sub>15</sub>O<sub>4</sub>N<sub>5</sub> [M+H]<sup>+</sup> 294.1197; found [M+H]<sup>+</sup> 294.1198.

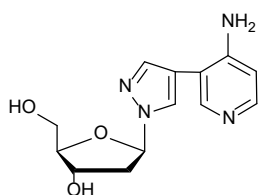

#### 1-(β-D-2'-Deoxyribofuranosyl)-4-(4-aminopyridin-3-yl)pyrazole (**14**).

The reaction mixture (28.1 mL in total) contained 60 mM Thymidine (408 mg), 20 mM **8** (90 mg), 30 mM potassium phosphate buffer pH 7.0, 77 μg of *E. coli* cells overexpressing recombinant TP (dry weight, 152 units of activity), 56 mg of *E. coli* cells overexpressing recombinant PNP (dry weight, 13552 units of activity). The reaction mixture was stirred 60 h at 47 °C until the yield of the product in reaction mixture reached 93% according to RP HPLC, buffer for the elution contained 3% acetonitrile. The reaction mixture was applied on 70 mL of Dowex-1x8 resin (HO<sup>-</sup>). The resin was thoroughly washed with water (600 mL). Fleximer **14** was eluted with 60% ethanol. The eluent was evaporated to dryness *in vacuo* and the residue was thoroughly dried in high *vacuo* to give 73 mg (45.3%) of **14** as light-yellow viscous oil.

<sup>1</sup>H NMR (600.2 MHz, D<sub>2</sub>O, TSP) δ: 8.12, (1 H, s, H-5A), 8.10 (1 H, s, H-2B), 8.05 (1 H, d, *J* = 5.4, H-6B), 7.85 (1 H, s, H-3A), 6.83 (1 H, d, *J* = 5.7, H-5B), 6.31 (1 H, t, *J* = 6.5, H-1'), 4.63-4.59 (1 H, m, H-3'), 4.14-4.09 (1 H, m, H-4'), 3.79 (1 H, dd, *J* = 12.3, 4.0, Ha-5'), 3.69 (1 H, dd, *J* = 12.3, 5.9, Hb-5'), 2.88-2.81 (1 H, m, Ha-2'), 2.57-2.50 (1 H, m, Hb-2'). <sup>13</sup>C NMR (150.9 MHz, D<sub>2</sub>O, TSP) δ: 153.6 (C-4B), 148.7 (C-2B), 147.8 (C-6B), 141.1 (C-3A), 130.3 (C-5A), 116.7 (C-3B), 114.8 (C-4A), 111.1 (C-5B), 90.1 (C-1'), 87.8 (C-4'), 72.0 (C-3'), 62.6 (C-5'), 39.5 (C-2'). <sup>15</sup>N NMR (71 MHz, DMSO-*d*<sub>6</sub>) δ: 302.52 (N2), 273.49 (N1), 226.21 (N1), 68.88 (6-NH<sub>2</sub>). λ<sub>max</sub> 272 (ε 7000). HRMS *m/z*: calculated for C<sub>13</sub>H<sub>16</sub>O<sub>3</sub>N<sub>4</sub> [M+H]<sup>+</sup> 277.1295; found [M+H]<sup>+</sup> 277.1294.

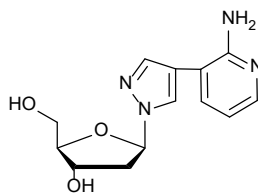

#### 1-(β-D-2'-Deoxyribofuranosyl)-4-(2-aminopyridin-3-yl)pyrazole (**15**).

The reaction mixture (19 mL in total) contained 60 mM Thymidine (276 mg), 20 mM **9** (59 mg), 30 mM potassium phosphate buffer pH 7.0, 31.3 μg of *E. coli* cells overexpressing recombinant TP (dry weight, 61.9 units of activity), 19 mg of *E. coli* cells overexpressing recombinant PNP (dry weight, 4598 units of activity). The reaction mixture was stirred 8 h at 47 °C until the yield of the product in reaction mixture reached 93% according to RP HPLC, buffer for the elution contained 10 % acetonitrile. The



reaction mixture was applied on 25 mL of Dowex-1x8 resin (HO<sup>-</sup>). The resin was thoroughly washed with water (300 mL). Fleximer **15** was eluted with 60% ethanol. The eluent was evaporated to dryness *in vacuo* and the residue was thoroughly dried in high *vacuo* to give 43 mg (45.3%) of **15** as light-yellow viscous oil.

<sup>1</sup>H NMR (600.2 MHz, D<sub>2</sub>O, TSP) δ: 8.12, (1 H, s, H-5A), 7.96 (1 H, dd, *J* = 5.2, 1.6, H-6B), 7.88 (1 H, s, H-3A), 7.62 (1 H, dd, *J* = 7.5, 1.7, H-4B), 6.89 (1 H, dd, *J* = 7.4, 5.2, H-5B), 6.30 (1 H, t, *J* = 6.5, H-1'), 4.63-4.59 (1 H, m, H-3'), 4.13-4.10 (1 H, m, H-4'), 3.79 (1 H, dd, *J* = 12.3, 4.0, Ha-5'), 3.69 (1 H, dd, *J* = 12.3, 5.8, Hb-5'), 2.87-2.81 (1 H, m, Ha-2'), 2.56-2.50 (1 H, m, Hb-2'). <sup>13</sup>C NMR (150.9 MHz, D<sub>2</sub>O, TSP) δ: 156.7 (C-2B), 146.8 (C-6B), 140.9 (C-3A), 139.6 (C-4B), 130.0 (C-5A), 119.1 (C-3B), 116.2 (C-5B), 114.7 (C-4A), 90.1 (C-1'), 87.8 (C-4'), 71.9 (C-3'), 62.6 (C-5'), 39.5 (C-2'). <sup>15</sup>N NMR (71 MHz, DMSO-*d*<sub>6</sub>) δ: 302.96 (N2), 271.19 (N1), 225.96 (N1), 73.253 (6-NH<sub>2</sub>). λ<sub>max</sub> 309 (ε 5000). HRMS *m/z*: calculated for C<sub>13</sub>H<sub>16</sub>O<sub>3</sub>N<sub>4</sub> [M+H]<sup>+</sup> 277.1295; found [M+H]<sup>+</sup> 277.1287.

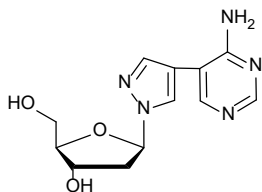

#### 1-(β-D-2'-Deoxyribofuranosyl)-4-(4-aminopyrimidin-5-yl)pyrazole (**16**).

The reaction mixture (15.2 mL in total) contained 60 mM Thymidine (220.7 mg), 20 mM **10** (48.6 mg), 30 mM potassium phosphate buffer pH 7.0, 25 μg of *E. coli* cells overexpressing recombinant TP (dry weight, 49.5 units of activity), 15.2 mg of PNP-MC (dry weight, 3678 units of activity). The reaction mixture was stirred 12 h at 47 °C until the yield of the product in reaction mixture reached 94% according to RP HPLC, buffer for the elution contained 5 % acetonitrile. The reaction mixture was applied on 25 mL of Dowex-1x8 resin (HO<sup>-</sup>). The resin was thoroughly washed with water (300 mL). Fleximer **16** was eluted with 60% ethanol. The eluent was evaporated to dryness *in vacuo* and the residue was thoroughly dried in high *vacuo* to give 43 mg (51.4%) of **16** as light-yellow viscous oil.

<sup>1</sup>H NMR (600.2 MHz, D<sub>2</sub>O, TSP) δ: 8.35 (1 H, s, H-2B), 8.14 (2 H, s, H-5A, H-6B), 7.87 (1 H, s, H-3A), 6.30 (1 H, t, *J* = 6.5, H-1'), 4.63-4.59 (1 H, m, 1H, H-3'), 4.14-4.09 (1 H, m, H-4'), 3.79 (1 H, dd, *J* = 12.3, 4.0, Ha-5'), 3.69 (1 H, dd, *J* = 12.3, 5.9, Hb-5'), 2.87-2.81 (1 H, m, 1H, Ha-2'), 2.57-2.51 (1 H, m, Hb-2'). <sup>13</sup>C NMR (150.9 MHz, D<sub>2</sub>O, TSP) δ: 162.0 (C-4B), 157.0 (C-2B), 154.1 (C-6B), 140.9 (C-3A), 130.4 (C-5A), 115.4 (C-5B), 111.4 (C-4A), 90.2 (C-1'), 87.8 (C-4'), 71.9 (C-3'), 62.6 (C-5'), 39.5 (C-2'). <sup>15</sup>N NMR (71 MHz, DMSO-*d*<sub>6</sub>) δ: 303.33 (N2), 261.31 (N3), 249.45 (N1), 226.82 (N1), 82.53 (6-NH<sub>2</sub>). λ<sub>max</sub> 285 (ε 5300). HRMS *m/z*: calculated for C<sub>12</sub>H<sub>15</sub>O<sub>3</sub>N<sub>5</sub> [M+H]<sup>+</sup> 278.1248; found [M+H]<sup>+</sup> 278.1247.

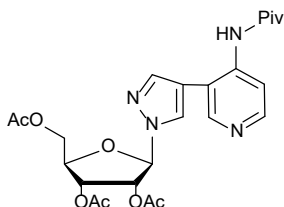

#### 1-(β-D-(2',3',5'-Triacetylribofuranosyl))-4-(4-pivaloylaminopyridin-3-yl)pyrazole (**17**).

Was synthesized starting from 4-(4-pivaloylaminopyridin-3-yl)-1*H*-pyrazole **5**. After purification on a silica gel column using 5% of methanol in chloroform for elution and additional purification by PLC in ethyl acetate the yield of compound **17** as white powder was 51 % (125 mg). <sup>1</sup>H NMR (300.1 MHz, CDCl<sub>3</sub>) δ: 8.46, (1H, d, *J* = 5.9 Hz, H-6B), 8.42-8.34 (2H, m, H-2B, H-5B), 7.79 (1H, s, NH), 7.74 (1H, s, H-3A), 7.71 (1H, s, H-5A), 5.95 (1H, d, *J* = 3.1 Hz, H-1'), 5.80 (1H, dd, *J* = 5.2, 3.1 Hz, H-2'), 5.66 (1H, t, *J* = 5.7 Hz, H-3'), 4.48-4.37 (2H, m, H-5'), 4.26-4.17 (1H, m, H-4'), 2.12 (3H, s, Ac), 2.11 (3H, s, Ac), 2.06 (3H, s, Ac), 1.19 (9H, s, Piv). <sup>13</sup>C NMR (75.5

MHz, CDCl<sub>3</sub>),  $\delta$ : 177.2 (C(O)Piv), 170.5 (C(O)Ac), 169.6 (C(O)Ac), 169.5 (C(O)Ac), 149.8 (C-2B), 149.7 (C-6B), 143.4 (C-4B), 140.5 (C-3A), 129.0 (C-5A), 117.2 (C-3B), 115.4 (C-4A), 113.9 (C-5B), 91.7 (C-1'), 80.3 (C-4'), 74.5 (C-2'), 71.1 (C-3'), 63.5 (C-5'), 29.8 (C-(CH<sub>3</sub>)<sub>3</sub>), 27.4 ((CH<sub>3</sub>)<sub>3</sub>), 20.8 (C-Ac), 20.6 (2C, 2xAc).

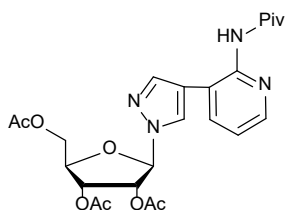

**1-( $\beta$ -D-(2',3',5'-Triacetylribofuranosyl))-4-(2-pivaloylaminopyridin-3-yl)pyrazole (18).**

Was synthesized starting from 4-(2-pivaloylaminopyridin-3-yl)-1H-pyrazole **6**. After purification on a silica gel column using 5% of methanol in chloroform for elution and additional purification by PLC in ethyl acetate the yield of compound **18** as white powder was 57 % (144 mg). <sup>1</sup>H NMR (300.1 MHz, CDCl<sub>3</sub>),  $\delta$ : 8.39 (1H, dd,  $J$  = 4.7, 1.5 Hz, H-6B), 7.94 (1H, br s, NH), 7.75 (1H, s, H-5A), 7.71 (1H, s, H-3A), 7.68 (1H, dd,  $J$  = 7.6, 1.8 Hz, H-4B), 7.19 (1H, dd,  $J$  = 7.6, 4.8 Hz, H-5B), 5.90 (1H, d,  $J$  = 3.2 Hz, H-1'), 5.81 (1H, dd,  $J$  = 5.2, 3.2 Hz, H-2'), 5.69 (1H, t,  $J$  = 5.4 Hz, H-3'), 4.47-4.37 (2H, m, H-5'), 4.20 (1H, dd,  $J$  = 6.3, 6.3 Hz, H-4'), 2.12 (3H, s, Ac), 2.11 (3H, s, Ac), 2.07 (3H, s, Ac), 1.23 (9H, s, Piv). <sup>13</sup>C NMR (176 MHz, CDCl<sub>3</sub>)  $\delta$ : 176.2 (C(O)Piv), 170.0 (C(O)Ac), 169.0 (C(O)Ac), 168.8 (C(O)Ac), 147.9 (C-6B), 146.5 (C-2B), 139.6 (C-3A), 138.2 (C-4B), 127.8 (C-5A), 122.9 (C-3B), 120.9 (C-5B), 118.5 (C-4A), 90.9 (C-1'), 79.6 (C-4'), 73.8 (C-2'), 70.6 (C-3'), 63.0 (C-5'), 29.1 (C-(CH<sub>3</sub>)<sub>3</sub>), 26.8 (3C, (CH<sub>3</sub>)<sub>3</sub>), 20.2 (C-Ac), 20.0 (C-Ac), 19.9 (C-Ac).

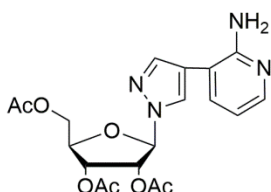

**1-( $\beta$ -D-(2',3',5'-Triacetylribofuranosyl))-4-(2-aminopyrimidin-5-yl)pyrazole.** Was synthesized starting from 4-(2-(bis(*tert*-butyloxycarbonyl)amino)pyridin-3-yl)-1H-pyrazole. After purification on a silica gel column using 5% of methanol in chloroform for elution and additional purification by PLC in ethyl acetate the yield of compound **18** as white powder was 27 % (56 mg). <sup>1</sup>H NMR (300.1 MHz, CDCl<sub>3</sub>),  $\delta$ : 7.85 (1H, s, H-5A), 7.81 (1H, dd,  $J$  = 5.7, 1.7 Hz, H-6B), 7.64 (1H, s, H-3A), 7.53 (1H, dd,  $J$  = 7.4, 1.7 Hz, H-4B), 6.76 (1H, dd,  $J$  = 7.4, 5.8 Hz, H-5B), 6.34 – 6.26 (1H, m, H-1'), 6.15 (2H, brs, NH<sub>2</sub>), 5.60 (1H, t,  $J$  = 5.6 Hz, H-2'), 5.36 (1H, dd,  $J$  = 5.9, 5.2 Hz, H-3'), 4.67-4.63 (1H, m, H-4'), 4.37-4.32 (1H, m, Hb-5'), 4.20-4.15 (1H, m, Ha-5'), 2.08 (3H, s, Ac), 2.03 (3H, s, Ac), 1.85 (3H, s, Ac). <sup>13</sup>C NMR (75.5 MHz, CDCl<sub>3</sub>)  $\delta$ : 173.5 (C(O)Ac), 173.2 (C(O)Ac), 172.9 (C(O)Ac), 154.1 (C-6B), 146.6 (C-2B), 139.6 (C-3A), 138.3 (C-4B), 127.2 (C-5A), 113.2 (C-3B), 95.6 (C-5B), 93.7 (C-4A), 98.0 (C-1'), 79.8 (C-4'), 70.3 (C-2'), 70.2 (C-3'), 62.6 (C-5'), 20.3 (C-Ac), 20.0 (C-Ac), 19.7 (C-Ac).

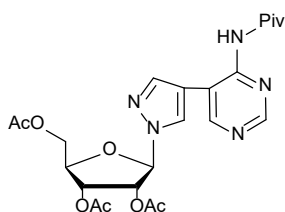

**1-( $\beta$ -D-(2',3',5'-Triacetylribofuranosyl))-4-(4-pivaloylaminopyrimidin-5-yl)pyrazole (19).** Was synthesized starting from 4-(4-pivaloylaminopyrimidin-5-yl)-1H-pyrazole **7**. After purification on a silica gel column using 5% of methanol in chloroform for elution and additional purification by PLC in ethyl acetate the yield of compound **19** as white powder was 68 % (171 mg). <sup>1</sup>H NMR (300.1 MHz, CD<sub>3</sub>OD),  $\delta$ : 8.91, (1H, s, H-2B), 8.80 (1H, s, H-5A), 8.13 (1H, s, H-6B), 7.91 (1H, s, 6-NH<sub>2</sub>Piv), 7.88 (1H, s, H-3A),

6.09 (1H, d,  $J = 3.5$  Hz, H-1'), 5.82 (1H, dd,  $J = 5.3, 3.5$  Hz, H-2'), 5.73-5.66 (1H, m, H-3'), 4.48-4.37 (2H, m, H-5'), 4.26-4.18 (1H, m, H-4'), 2.12 (3H, s, Ac), 2.13 (3H, s, Ac), 2.07 (3H, s, Ac), 1.26 (9H, s, Piv).  $^{13}\text{C}$  NMR (75.5 MHz,  $\text{CD}_3\text{OD}$ ),  $\delta$ : 179.4 (C(O)Piv), 172.3 (C(O)Ac), 171.4 (C(O)Ac), 171.1 (C(O)Ac), 158.6 (C-2B), 157.5 (C-6B), 157.3 (C-4B), 141.1 (C-3A), 130.7 (C-5A), 123.3 (C-5B), 116.8 (C-4A), 92.5 (C-1'), 81.4 (C-4'), 75.5 (C-2'), 72.5 (C-3'), 64.5 (C-5'), 40.7 ( $\underline{\text{C}}\text{-C}(\text{CH}_3)_3$ ), 27.4 ( $(\text{CH}_3)_3$ ), 20.7 (C-Ac), 20.41 (C-Ac), 20.35 (C-Ac).

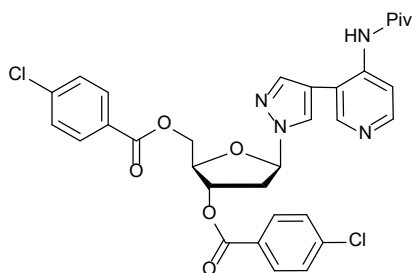

**1-( $\beta$ -D-(3',5'-di-(4-Chlorobenzoyl)-2'-deoxyribofuranosyl))-4-(4-pivaloylaminopyridin-3-yl)pyrazole (20).** Was synthesized starting from 4-(4-pivaloylaminopyridin-3-yl)-1H-pyrazole **5**. After purification on a silica gel column using 5% of methanol in chloroform for elution and additional purification by PLC in ethyl acetate the yield of  $\beta$ -**20** as inseparable anomeric mixture with 13% of  $\alpha$  anomer was 19% (60.5 mg).  $^1\text{H}$  NMR (300.1 MHz,  $\text{CDCl}_3$ ),  $\delta$ : 8.47, (1H, d,  $J = 5.7$  Hz, H-6B), 8.43-8.34 (2H, m, H-2B, H-5B), 8.00-7.88 (3H, m, 2H-Ph, H-3A), 7.82 (1H, s, NH), 7.79-7.66 (3H, m, H-5A, 2H-Ph), 7.46-7.28 (4H, m, 4H-Ph), 6.30 (1H, dd,  $J = 6.8, 2.2$  Hz, H-1'), 5.61 (1H, ddd,  $J = 7.3, 2.9, 2.7$  Hz, H-3'), 4.82-4.75 (1H, m, H-4'), 4.67-4.53 (2H, m, 2H-5'), 3.17 (1H, ddd,  $J = 14.9, 4.8, 2.4$  Hz, H-2'a), 3.06-2.93 (1H, m, H-2'b), 1.16 (9H, 2s, Piv).  $^{13}\text{C}$  NMR (75.5 MHz,  $\text{CDCl}_3$ ),  $\delta$ : 177.0 (C(O)Piv), 165.3 (C(O)), 165.1 (C(O)), 149.71 (C-2B), 149.65 (C-6B), 143.2 (C-4B), 140.5 and 140.1 (2C, 2xC4(Ph)), 139.2(C-3A), 131.2, 130.0 and 129.0x2 (8C, 2xC2, 2xC3, 2xC5 and 2xC6(Ph)), 128.9 (2C, 2xC1(Ph)), 127.4 (C-5A), 117.5 (C-3B), 115.2 (C-4A), 113.9 (C-5B), 90.7 (C-1'), 83.6 (C-4'), 74.9 (C-3'), 70.5 (C-5'), 64.2 (C-2'), 29.8 ( $\underline{\text{C}}\text{-C}(\text{CH}_3)_3$ ), 27.4 ( $(\text{CH}_3)_3$ ).

**1-( $\beta$ -D-(3',5'-Di-(4-chlorobenzoyl)-2'-deoxyribofuranosyl))-4-(2-pivaloylaminopyrimidin-3-yl)pyrazole ( $\beta$ -21) and 1-( $\alpha$ -D-(3',5'-Di-(4-chlorobenzoyl)-2'-deoxyribofuranosyl))-4-(2-pivaloylaminopyrimidin-3-yl)pyrazole ( $\alpha$ -21).** Were synthesized starting from 4-(2-pivaloylaminopyrimidin-5-yl)-1H-pyrazole **6**. After purification on a silica gel column using 5% of methanol in chloroform for elution the yield of anomeric mixture  $\beta$ -**21** and  $\alpha$ -**21** (3:2) was 91 % (290 mg). Additional purification by PLC in ethyl acetate gave individual isomers.

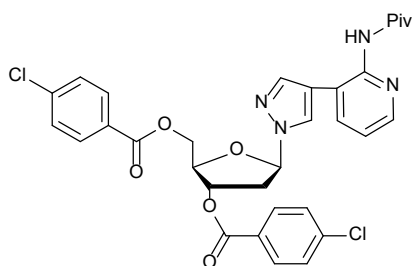

**1-( $\beta$ -D-(3',5'-Di-(4-chlorobenzoyl)-2'-deoxyribofuranosyl))-4-(2-pivaloylaminopyrimidin-5-yl)pyrazole ( $\beta$ -21).**

$^1\text{H}$  NMR (300.1 MHz,  $\text{CDCl}_3$ ),  $\delta$ : 8.37 (1H, dd,  $J = 4.8, 1.6$  Hz, H-6B), 8.11-7.95 (3H, m, NH, 2H-Ph), 7.92 (1H, s, H-5A), 7.83-7.75 (2H, m, 2H-Ph), 7.72 (1H, s, H-3A), 7.63 (1H, dd,  $J = 7.7, 1.8$  Hz, H-4B), 7.46-7.38 (2H, m, 2H-Ph), 7.33-7.26 (2H, m, 2H-Ph), 7.17 (1H, dd,  $J = 7.7, 4.8$  Hz, H-5B), 6.24 (1H, dd,  $J = 6.8, 2.3$  Hz, H-1'), 5.59 (1H, ddd,  $J = 7.4, 3.1, 2.9$  Hz, H-3'), 4.82-4.73 (1H, m, H-4'), 4.64-4.53 (2H, m, H-5'), 3.14 (1H, ddd,  $J = 14.8, 5.1, 2.6$  Hz, Hb-2'), 3.03-2.89 (1H, m, Ha-2'), 1.23 (9H, s, Piv).  $^{13}\text{C}$  NMR (75.5 MHz,  $\text{CDCl}_3$ )  $\delta$  176.8 (C(O)Piv), 165.3 (C(O)), 165.1 (C(O)), 148.3 (C-6B), 146.7 (C-2B), 140.1 (C-3A), 138.9 x2 (2xC4 (Ph)), 138.3 (C-4B),

131.2x2, 131.1x2, 129.0x2 and 128.9x2 (2xC2, 2xC3, 2xC5 and 2xC6 (Ph)), 128.0 (C-5A), 124.0 (C-3B), 121.5 (C-5B), 118.9 (C-4A), 90.3 (C-1'), 83.2 (C-4'), 74.9 (C-3'), 64.3 (C-5'), 37.8 (C-2'), 29.7 (C-C(CH<sub>3</sub>)<sub>3</sub>), 27.4 ((CH<sub>3</sub>)<sub>3</sub>).

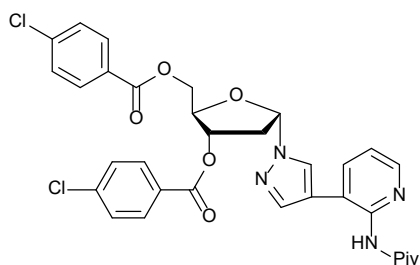

**1-( $\alpha$ -D-(3',5'-Di-(4-chlorobenzoyl))-2'-deoxyribofuranosyl)-4-(2-pivaloylaminopyrimidin-5-yl)pyrazole ( $\alpha$ -21).**

<sup>1</sup>H NMR (300.1 MHz, CDCl<sub>3</sub>),  $\delta$ : 8.49 (1H, br s, NH), 8.37 (1H, dd,  $J$  = 5.1, 1.7 Hz, H-6B), 8.02-7.93 (4H, m, 4H-Ph), 7.80 (1H, s, H-5A), 7.75 (1H, dd,  $J$  = 7.7, 1.7 Hz, H-4B), 7.68 (1H, s, H-3A), 7.47-7.43 (2H, m, 2H-Ph), 7.39-7.32 (2H, m, 2H-Ph), 7.30-7.23 (1H, m, H-5B), 6.23 (1H, t,  $J$  = 6.0 Hz, H-1'), 5.88-5.78 (1H, m, H-3'), 4.66-4.44 (3H, m, H-3' and H-5'), 3.32 (1H, ddd,  $J$  = 14.2, 6.7, 5.5 Hz, Hb-2'), 2.76-2.65 (1H, m, Ha-2'), 1.25 (9H, s, Piv). <sup>13</sup>C NMR (75.5 MHz, CDCl<sub>3</sub>)  $\delta$  177.0 (C(O)Piv), 165.5 (C(O)), 165.2 (C(O)), 148.2 (C-6B), 144.4 (C-2B), 140.4 (C-3A), 139.9 (C-4B), 139.3 x2 (2xC4 (Ph)), 131.6x2, 131.3x2, 129.1x2 and 128.9x2 (2xC2, 2xC3, 2xC5 and 2xC6 (Ph)), 128.2 (C-5A), 127.9 (2xC1 (Ph)), 125.1 (C-3B), 121.7 (C-5B), 118.7 (C-4A), 89.9 (C-1'), 82.9 (C-4'), 75.7 (C-3'), 64.6 (C-5'), 37.3 (C-2'), 29.8 (C-C(CH<sub>3</sub>)<sub>3</sub>), 27.4 ((CH<sub>3</sub>)<sub>3</sub>).

**1-( $\beta$ -D-(3',5'-Di-(4-chlorobenzoyl))-2'-deoxyribofuranosyl)-4-(4-pivaloylaminopyrimidin-5-yl)pyrazole ( $\beta$ -22) and 1-( $\alpha$ -D-(3',5'-Di-(4-chlorobenzoyl))-2'-deoxyribofuranosyl)-4-(4-pivaloylaminopyrimidin-5-yl)pyrazole ( $\alpha$ -22).** Were synthesized starting from 4-(4-pivaloylaminopyrimidin-5-yl)-1H-pyrazole **7**. After purification on a silica gel column using 5% of methanol in chloroform for elution the yield of anomeric mixture  **$\beta$ -22** and  **$\alpha$ -22** (3:1) was 63 % (201 mg). Additional purification by PLC in ethyl acetate gave individual isomers.

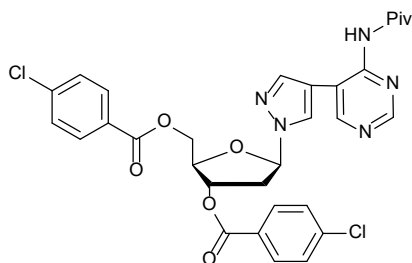

**1-( $\beta$ -D-(3',5'-Di-(4-chlorobenzoyl))-2'-deoxyribofuranosyl)-4-(4-pivaloylaminopyrimidin-5-yl)pyrazole ( $\beta$ -22).**

<sup>1</sup>H NMR (300.1 MHz, CDCl<sub>3</sub>),  $\delta$ : 8.93 (1H, s, H-2B), 8.53 (1H, s, H-5A), 8.03-7.88 (4H, m, 2H-Ph, NH, H-6B), 7.81-7.74 (2H, m, 2H-Ph), 7.71 (1H, d,  $J$  = 0.8 Hz, H-3A), 7.44-7.38 (2H, m, 4H-Ph), 7.36-7.28 (2H, m, 4H-Ph), 6.26 (1H, dd,  $J$  = 6.8, 2.3 Hz, H-1'), 5.59-5.49 (1H, ddd,  $J$  = 7.3, 2.9, 2.8 Hz, H-3'), 4.81-4.73 (1H, m, H-4'), 4.65-4.54 (2H, m, H-5'), 3.17 (1H, ddd,  $J$  = 14.9, 5.0, 2.5 Hz, Hb-2'), 3.04-2.90 (1H, m, Ha-2'), 1.19 (9H, s, Piv). <sup>13</sup>C NMR (75.5 MHz, CDCl<sub>3</sub>),  $\delta$ : 175.6 (C(O)Piv), 165.3 (C(O)), 165.2 (C(O)), 157.1 (C-2B), 155.3 (C-6B), 140.3 (C-4B), 140.1 (C-3A), 138.6x2 (2xC4 (Ph)), 131.13x2, 131.07x2, 129.02x2 and 128.97x2 (2xC2, 2xC3, 2xC5 and 2xC6 (Ph)), 127.6 (2xC1 (Ph)), 126.9 (C-5A), 117.8 (C-5B), 114.9 (C-4A), 90.5 (C-1'), 83.5 (C-4'), 74.9 (C-3'), 64.2 (C-5'), 37.8 (C-2'), 29.8 (C-C(CH<sub>3</sub>)<sub>3</sub>), 27.3 ((CH<sub>3</sub>)<sub>3</sub>).

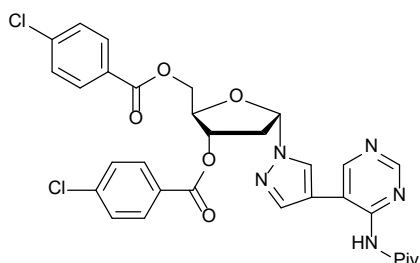

**1-( $\alpha$ -D-(3',5'-Di-(4-chlorobenzoyl))-2'-deoxyribofuranosyl)-4-(4-pivaloylamino-5-yl)pyrazole ( $\alpha$ -22)**

$^1\text{H}$  NMR (300.1 MHz,  $\text{CDCl}_3$ )  $\delta$  8.97 (1H, s, H-2B), 8.53 (1H, s, H-5A), 8.03-7.91 (4H, m, 2H-Ph), 7.80 (1H, s, H-6B), 7.69 (1H, s, H-3A), 7.49-7.42 (2H, m, 4H-Ph), 7.40-7.33 (m, 2H, 4H-Ph), 6.27 (1H, dd,  $J = 6.6, 5.2$  Hz, H-1'), 5.89-5.79 (1H, m, H-3'), 4.67-4.44 (3H, m, H-4' and 2xH-5'), 3.35 (1H, ddd,  $J = 14.2, 6.4, 5.7$  Hz, Hb-2'), 2.81-2.69 (1H, m, Ha-2'), 1.23 (s, 9H, Piv).  $^{13}\text{C}$  NMR (75.5 MHz,  $\text{CDCl}_3$ ),  $\delta$ : 165.4 (C(O)), 165.2 (C(O)), 157.1 (C(O)Piv), 156.9 (C-2B), 155.7 (C-6B), 140.4 (C-4B), 139.99 (C-3A), 139.2x2 (2xC4 (Ph)), 131.3x4, 129.1x2 and 128.4x2 (2xC2, 2xC3, 2xC5 and 2xC6 (Ph)), 128.1 (C-5A), 127.8 (2xC1, (Ph)), 117.4 (C-5B), 115.1 (C-4A), 90.1 (C-1'), 83.1 (C-4'), 75.7 (C-3'), 64.5 (C-5'), 40.5 (C-2'), 29.8 (C-C(CH<sub>3</sub>)<sub>3</sub>), 27.3 ((CH<sub>3</sub>)<sub>3</sub>).

## ***Nucleoside phosphorylase activity***

### **Uridine Phosphorylase (UP)**

The reaction mixture (1 mL in total), containing 100 mM of Uridine, 50 mM of Potassium phosphate buffer (pH 7.0) and about 0.5 µg of recombinant cells overexpressing the UP (calculated on dry cell mass) was incubated 5 min. at 60 °C the cell debris was spined down. An aliquot of 10 µl of reaction mixture was added to 400 µl of triethylammonium acetate buffer (pH7.0), heated to 100 °C. After 1 min the cell debris was spined down and the supernatant was analyzed with HPLC on the Waters Breeze system using Gemini C18, 5 µm, 150 x 4.6 mm column and isocratic elution with 5% acetonitrile in 0.1 M Triethylammonium acetate, pH 7.0, flow rate – 1 mL/min, injection volume – 5 µl. The HPLC column was calibrated with Uracil and Uridine. The UP activity was 1090 µmol/min x mg dry cells

### **Purine nucleoside phosphorylase (PNP)**

Procedure was similar to the above for UP, but the reaction mixture contained Inosine instead of Uridine and 1 µg recombinant cells, overexpressing the PNP (calculated on dry cell mass). The HPLC column was calibrated with Hypoxanthine and Inosine. HPLC analysis was as above; the PNP activity was 242 µmol/min x mg dry cells.

### **Thymidine phosphorylase (TP)**

The procedure was similar to the determination of UP, but the reaction mixture contained Thymidine, instead of Uridine and the incubation was at 50 °C. The HPLC column was calibrated with Thymine and Thymidine. HPLC analysis was as above, the PNP activity was 1978 µmol/min x mg dry cells.

## HPLC DATA

### 1-β-D-Ribofuranosyl-4-(4-aminopyridin-3-yl)pyrazole (**11**)

|                           |                        |                     |
|---------------------------|------------------------|---------------------|
| <b>Compound</b>           | Fleximer LN-98-R       | Lot # LN98R0121     |
| <b>Column</b>             | Gemini C18, 110Å       | 5μm<br>4.6 x 150 mm |
| <b>Column Temperature</b> | 30 °C                  |                     |
| <b>Solvent A</b>          | 0.1 M TEAA             |                     |
| <b>Solvent B</b>          | 80% CH <sub>3</sub> CN |                     |
| <b>Pump program</b>       | 0% - 15% B, 30 min;    | Flow = 1 ml/min     |
| <b>Detector</b>           | λ = 260 nm and         |                     |
| <b>Comments</b>           |                        |                     |

| SAMPLE INFORMATION |               |                  |                     |
|--------------------|---------------|------------------|---------------------|
| Sample Name:       | LN=98-R       | Acquired By:     | System              |
| Sample Type:       | Unknow n      | Date Acquired:   | 1/5/2021 3:24:39 PM |
| Vial:              | 1             | Acq. Method:     | Fleximers           |
| Injection #:       | 2             | Date Processed:  | 1/5/2021 4:01:10 PM |
| Injection Volume:  | 5.00 ul       | Channel Name:    | 2487Channel 1       |
| Run Time:          | 30.00 Minutes | Channel Desc.:   | 260                 |
|                    |               | Sample Set Name: |                     |

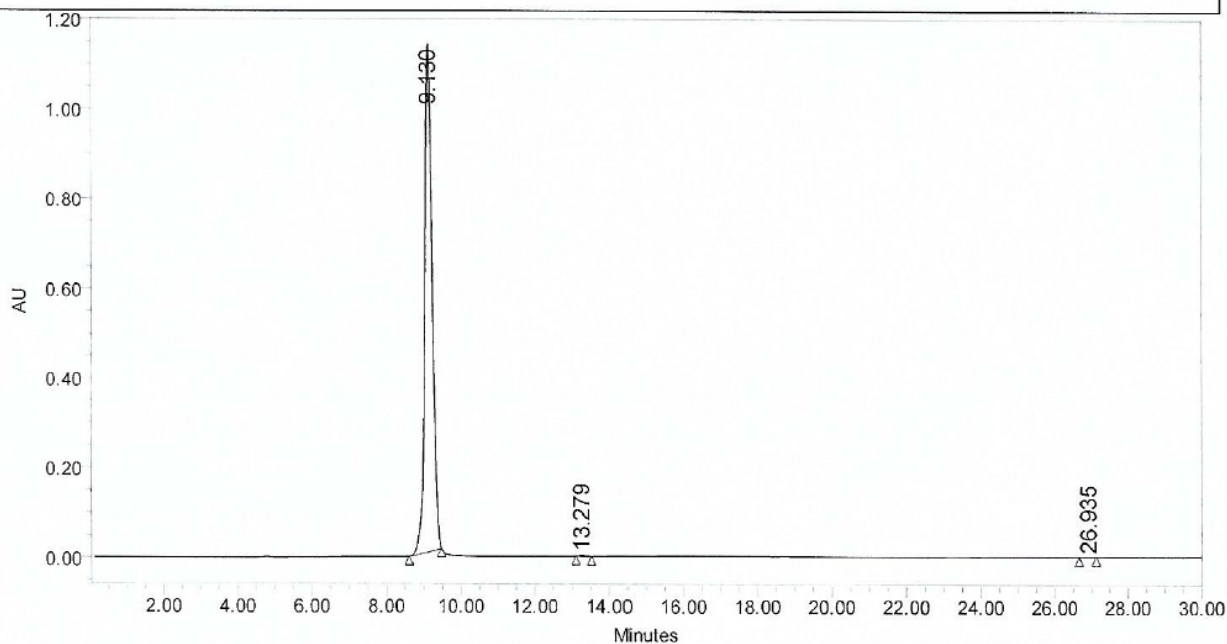

|   | RT (min) | Area (μV*sec) | % Area | Height (μV) | % Height |
|---|----------|---------------|--------|-------------|----------|
| 1 | 9.130    | 15343525      | 99.80  | 1131312     | 99.76    |
| 2 | 13.279   | 29865         | 0.19   | 2678        | 0.24     |
| 3 | 26.935   | 1622          | 0.01   | 94          | 0.01     |

1-β-D-Ribofuranosyl-4-(2-aminopyridin-3-yl)pyrazole (**12**)

|                           |                        |                 |                 |
|---------------------------|------------------------|-----------------|-----------------|
| <b>Compound</b>           | Fleximer LN-75-R       |                 | Lot # LN75R1020 |
| <b>Column</b>             | Gemini C18,110Å        | 5µm             | 4.6 x 150 mm    |
| <b>Column Temperature</b> | 30 °C                  |                 |                 |
| <b>Solvent A</b>          | 0.1 M TEAA             |                 |                 |
| <b>Solvent B</b>          | 80% CH <sub>3</sub> CN |                 |                 |
| <b>Pump program</b>       | 0% - 20% B, 30 min;    | Flow = 1 ml/min |                 |
| <b>Detector</b>           | λ = 260 nm and         |                 |                 |
| <b>Comments</b>           |                        |                 |                 |

SAMPLE INFORMATION

|                   |               |                  |                      |
|-------------------|---------------|------------------|----------------------|
| Sample Name:      | LN-75-R       | Acquired By:     | System               |
| Sample Type:      | Unknown       | Date Acquired:   | 10/7/2020 5:21:50 PM |
| Vial:             | 1             | Acq. Method:     | Fleximers2           |
| Injection #:      | 1             | Date Processed:  | 10/7/2020 6:33:57 PM |
| Injection Volume: | 5.00 ul       | Channel Name:    | 2487Channel 1        |
| Run Time:         | 30.00 Minutes | Channel Desc.:   | 260                  |
|                   |               | Sample Set Name: |                      |

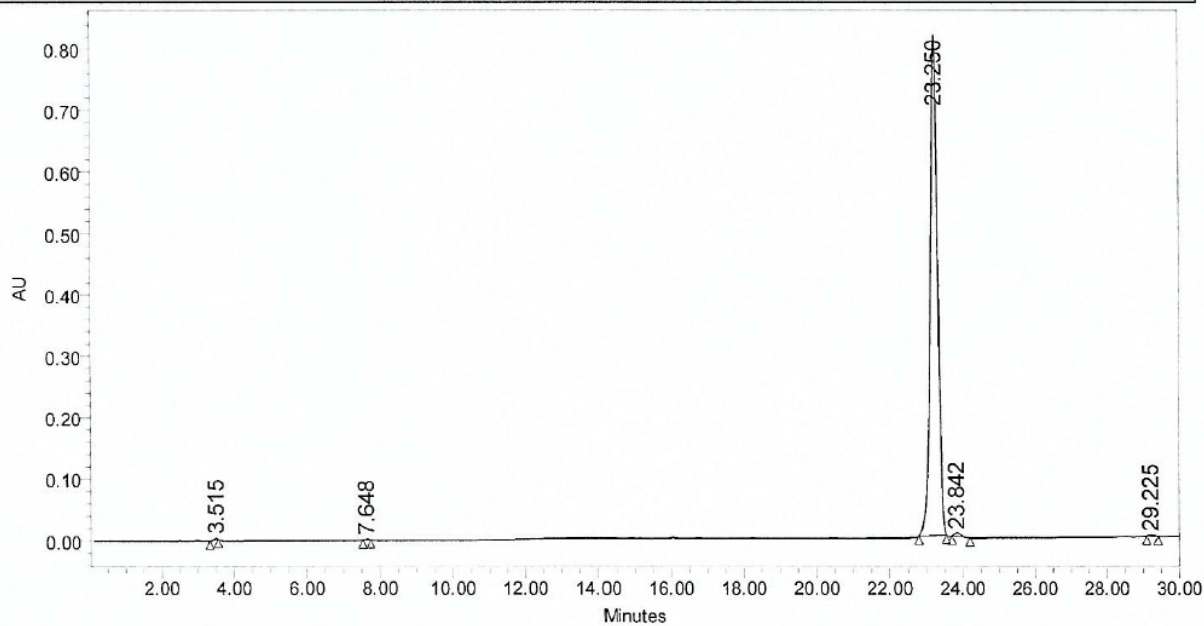

|   | RT (min) | Area (µV*sec) | % Area | Height (µV) | % Height |
|---|----------|---------------|--------|-------------|----------|
| 1 | 3.515    | 13287         | 0.12   | 2372        | 0.29     |
| 2 | 7.648    | 10843         | 0.09   | 1376        | 0.17     |
| 3 | 23.250   | 11392956      | 99.02  | 813907      | 98.62    |
| 4 | 23.842   | 67543         | 0.59   | 5707        | 0.69     |
| 5 | 29.225   | 20691         | 0.18   | 1906        | 0.23     |



1-β-D-Ribofuranosyl-4-(4-aminopyrimidin-5-yl)pyrazole (**13**)

|                           |                        |                 |                 |
|---------------------------|------------------------|-----------------|-----------------|
| <b>Compound</b>           | Fleximer LN-74-R       |                 | Lot # LN74R0820 |
| <b>Column</b>             | Gemini C18,110Å        | 5µm             | 4.6 x 150 mm    |
| <b>Column Temperature</b> | 30 °C                  |                 |                 |
| <b>Solvent A</b>          | 0.1 M TEAA             |                 |                 |
| <b>Solvent B</b>          | 80% CH <sub>3</sub> CN |                 |                 |
| <b>Pump program</b>       | 0% - 15% B, 30 min;    | Flow = 1 ml/min |                 |
| <b>Detector</b>           | λ = 260 nm and         |                 |                 |
| <b>Comments</b>           |                        |                 |                 |

SAMPLE INFORMATION

|                   |               |                  |                      |
|-------------------|---------------|------------------|----------------------|
| Sample Name:      | LN74R0820     | Acquired By:     | System               |
| Sample Type:      | Unknown       | Date Acquired:   | 8/13/2020 2:58:07 PM |
| Vial:             | 1             | Acq. Method:     | Flexomer LN74R       |
| Injection #:      | 1             | Date Processed:  | 8/13/2020 3:37:04 PM |
| Injection Volume: | 5.00 ul       | Channel Name:    | 2487Channel 1        |
| Run Time:         | 30.00 Minutes | Channel Desc.:   | 260                  |
|                   |               | Sample Set Name: |                      |

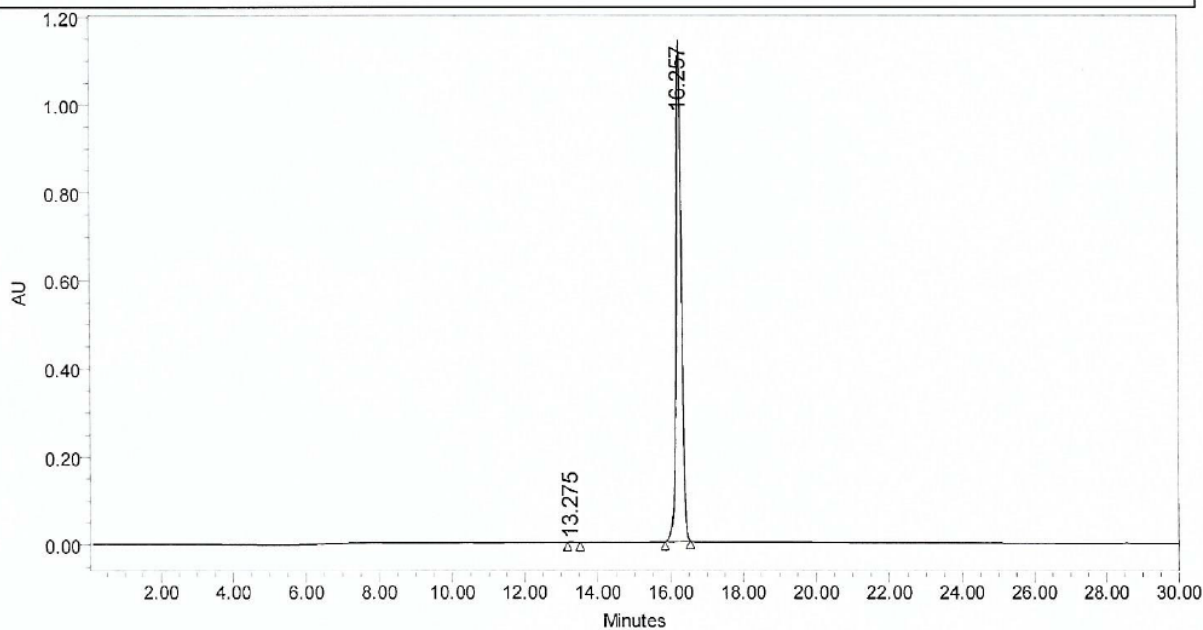

|   | RT (min) | Area (µV*sec) | % Area | Height (µV) | % Height |
|---|----------|---------------|--------|-------------|----------|
| 1 | 13.275   | 9346          | 0.08   | 1225        | 0.11     |
| 2 | 16.257   | 11653483      | 99.92  | 1145205     | 99.89    |

1-β-D-2'-Deoxyribofuranosyl-4-(4-aminopyridin-3-yl)pyrazole (**14**)

|                           |                        |                 |                 |
|---------------------------|------------------------|-----------------|-----------------|
| <b>Compound</b>           | Fleximer LN-98-D       |                 | Lot # LN98D1220 |
| <b>Column</b>             | Gemini C18,110Å        | 5μm             | 4.6 x 150 mm    |
| <b>Column Temperature</b> | 30 °C                  |                 |                 |
| <b>Solvent A</b>          | 0.1 M TEAA             |                 |                 |
| <b>Solvent B</b>          | 80% CH <sub>3</sub> CN |                 |                 |
| <b>Pump program</b>       | 0% - 15% B, 30 min;    | Flow = 1 ml/min |                 |
| <b>Detector</b>           | λ = 260 nm             |                 |                 |
| <b>Comments</b>           |                        |                 |                 |

| SAMPLE INFORMATION |               |                  |                     |
|--------------------|---------------|------------------|---------------------|
| Sample Name:       | LN(=98-D      | Acquired By:     | System              |
| Sample Type:       | Unknown       | Date Acquired:   | 1/5/2021 2:35:36 PM |
| Vial:              | 1             | Acq. Method:     | Fleximers           |
| Injection #:       | 1             | Date Processed:  | 1/5/2021 3:08:35 PM |
| Injection Volume:  | 5.00 ul       | Channel Name:    | 2487Channel 1       |
| Run Time:          | 30.00 Minutes | Channel Desc.:   | 260                 |
|                    |               | Sample Set Name: |                     |

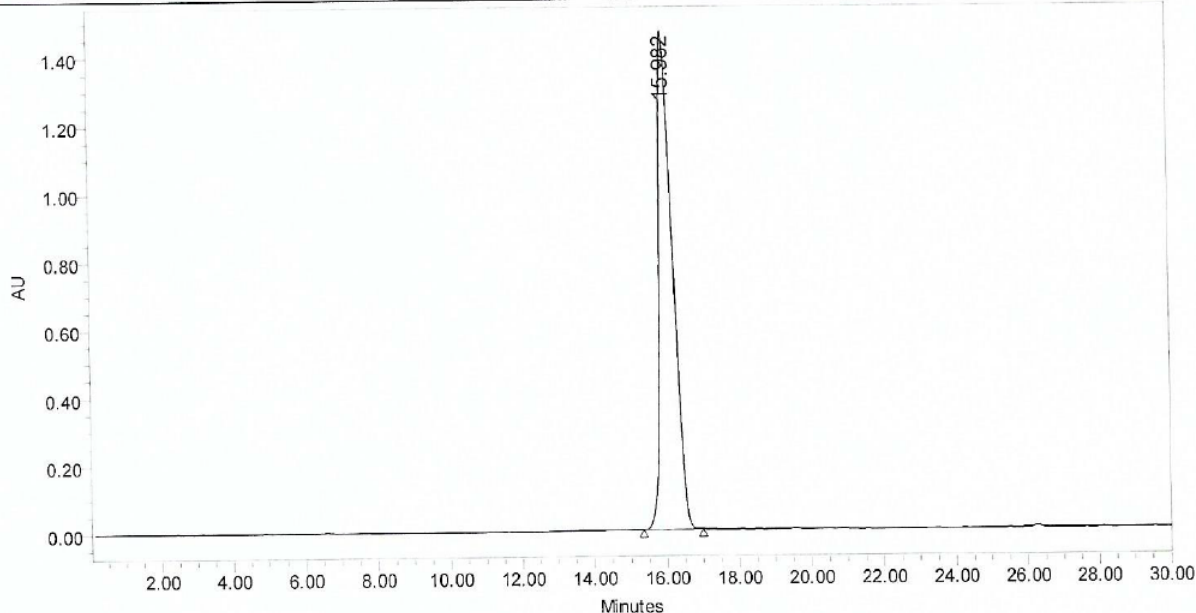

|   | RT (min) | Area (μV*sec) | % Area | Height (μV) | % Height |
|---|----------|---------------|--------|-------------|----------|
| 1 | 15.982   | 38303591      | 100.00 | 1465470     | 100.00   |

1-β-D-2'-Deoxyribofuranosyl-4-(2-aminopyridin-3-yl)pyrazole (**15**)

|                           |                        |                 |                 |
|---------------------------|------------------------|-----------------|-----------------|
| <b>Compound</b>           | Fleximer LN-75-D       |                 | Lot # LN75D1020 |
| <b>Column</b>             | Gemini C18,110Å        | 5μm             | 4.6 x 150 mm    |
| <b>Column Temperature</b> | 30 °C                  |                 |                 |
| <b>Solvent A</b>          | 0.1 M TEAA             |                 |                 |
| <b>Solvent B</b>          | 80% CH <sub>3</sub> CN |                 |                 |
| <b>Pump program</b>       | 0% - 20% B, 30 min;    | Flow = 1 ml/min |                 |
| <b>Detector</b>           | λ = 260 nm and         |                 |                 |
| <b>Comments</b>           |                        |                 |                 |

**SAMPLE INFORMATION**

|                   |               |                  |                      |
|-------------------|---------------|------------------|----------------------|
| Sample Name:      | LN-75-D       | Acquired By:     | System               |
| Sample Type:      | Unknown       | Date Acquired:   | 10/7/2020 5:59:57 PM |
| Vial:             | 1             | Acq. Method:     | Fleximers2           |
| Injection #:      | 1             | Date Processed:  | 10/7/2020 6:37:54 PM |
| Injection Volume: | 5.00 ul       | Channel Name:    | 2487Channel 1        |
| Run Time:         | 30.00 Minutes | Channel Desc.:   | 260                  |
|                   |               | Sample Set Name: |                      |

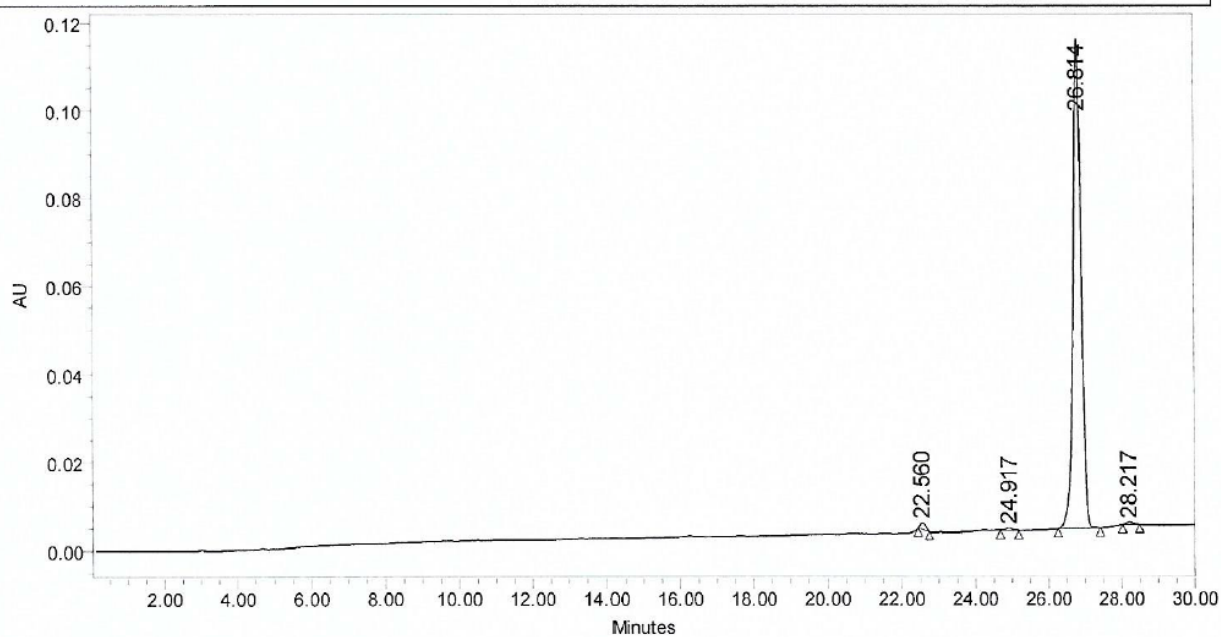

|   | RT (min) | Area (μV*sec) | % Area | Height (μV) | % Height |
|---|----------|---------------|--------|-------------|----------|
| 1 | 22.560   | 14619         | 0.85   | 1472        | 1.29     |
| 2 | 24.917   | 7112          | 0.42   | 571         | 0.50     |
| 3 | 26.814   | 1681546       | 98.26  | 111189      | 97.73    |
| 4 | 28.217   | 8031          | 0.47   | 539         | 0.47     |

1-β-D-2'-Deoxyribofuranosyl-4-(4-aminopyrimidin-5-yl)pyrazole (16)

|                    |                        |                 |                 |
|--------------------|------------------------|-----------------|-----------------|
| Compound           | Fleximer LN-74-D       |                 | Lot # LN74D0920 |
| Column             | Gemini C18,110Å        | 5μm             | 4.6 x 150 mm    |
| Column Temperature | 30 °C                  |                 |                 |
| Solvent A          | 0.1 M TEAA             |                 |                 |
| Solvent B          | 80% CH <sub>3</sub> CN |                 |                 |
| Pump program       | 0% - 15% B, 30 min;    | Flow = 1 ml/min |                 |
| Detector           | λ = 260 nm and         |                 |                 |
| Comments           |                        |                 |                 |

| SAMPLE INFORMATION |               |                  |                      |
|--------------------|---------------|------------------|----------------------|
| Sample Name:       | LN74D         | Acquired By:     | System               |
| Sample Type:       | Unknown       | Date Acquired:   | 9/24/2020 5:01:37 PM |
| Vial:              | 1             | Acq. Method:     | Fleximers            |
| Injection #:       | 1             | Date Processed:  | 9/24/2020 5:32:50 PM |
| Injection Volume:  | 5.00 ul       | Channel Name:    | 2487Channel 1        |
| Run Time:          | 30.00 Minutes | Channel Desc.:   | 260                  |
|                    |               | Sample Set Name: |                      |

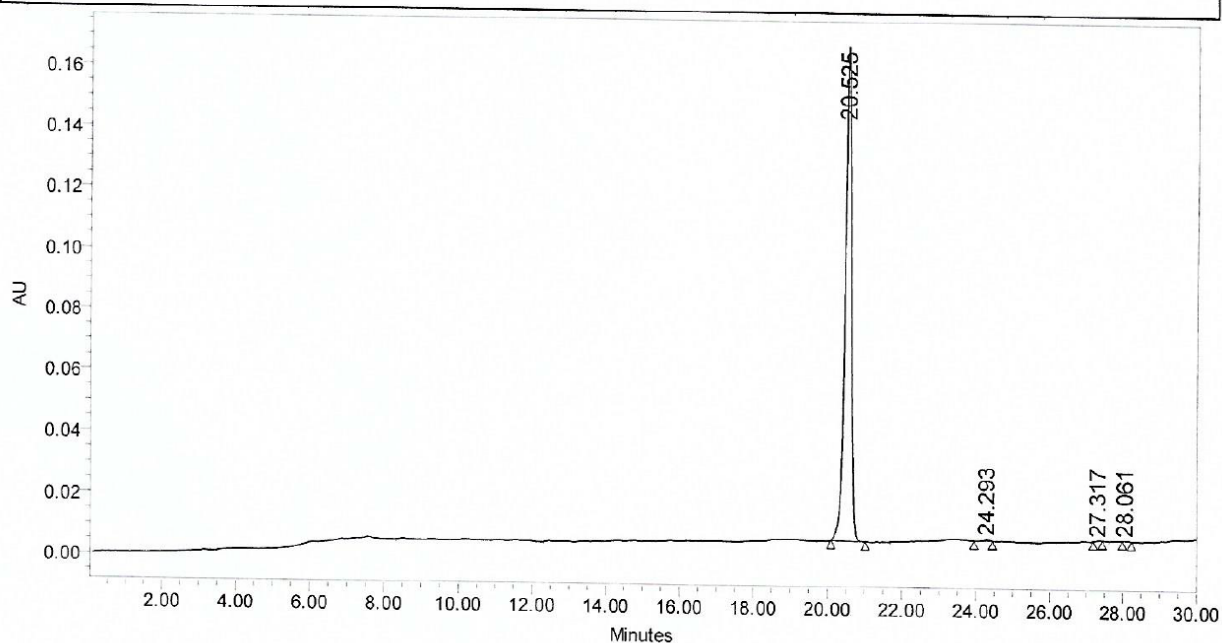

|   | RT (min) | Area (μV*sec) | % Area | Height (μV) | % Height |
|---|----------|---------------|--------|-------------|----------|
| 1 | 20.525   | 1898363       | 99.56  | 162016      | 99.50    |
| 2 | 24.293   | 6085          | 0.32   | 572         | 0.35     |
| 3 | 27.317   | 980           | 0.05   | 120         | 0.07     |
| 4 | 28.061   | 1329          | 0.07   | 119         | 0.07     |

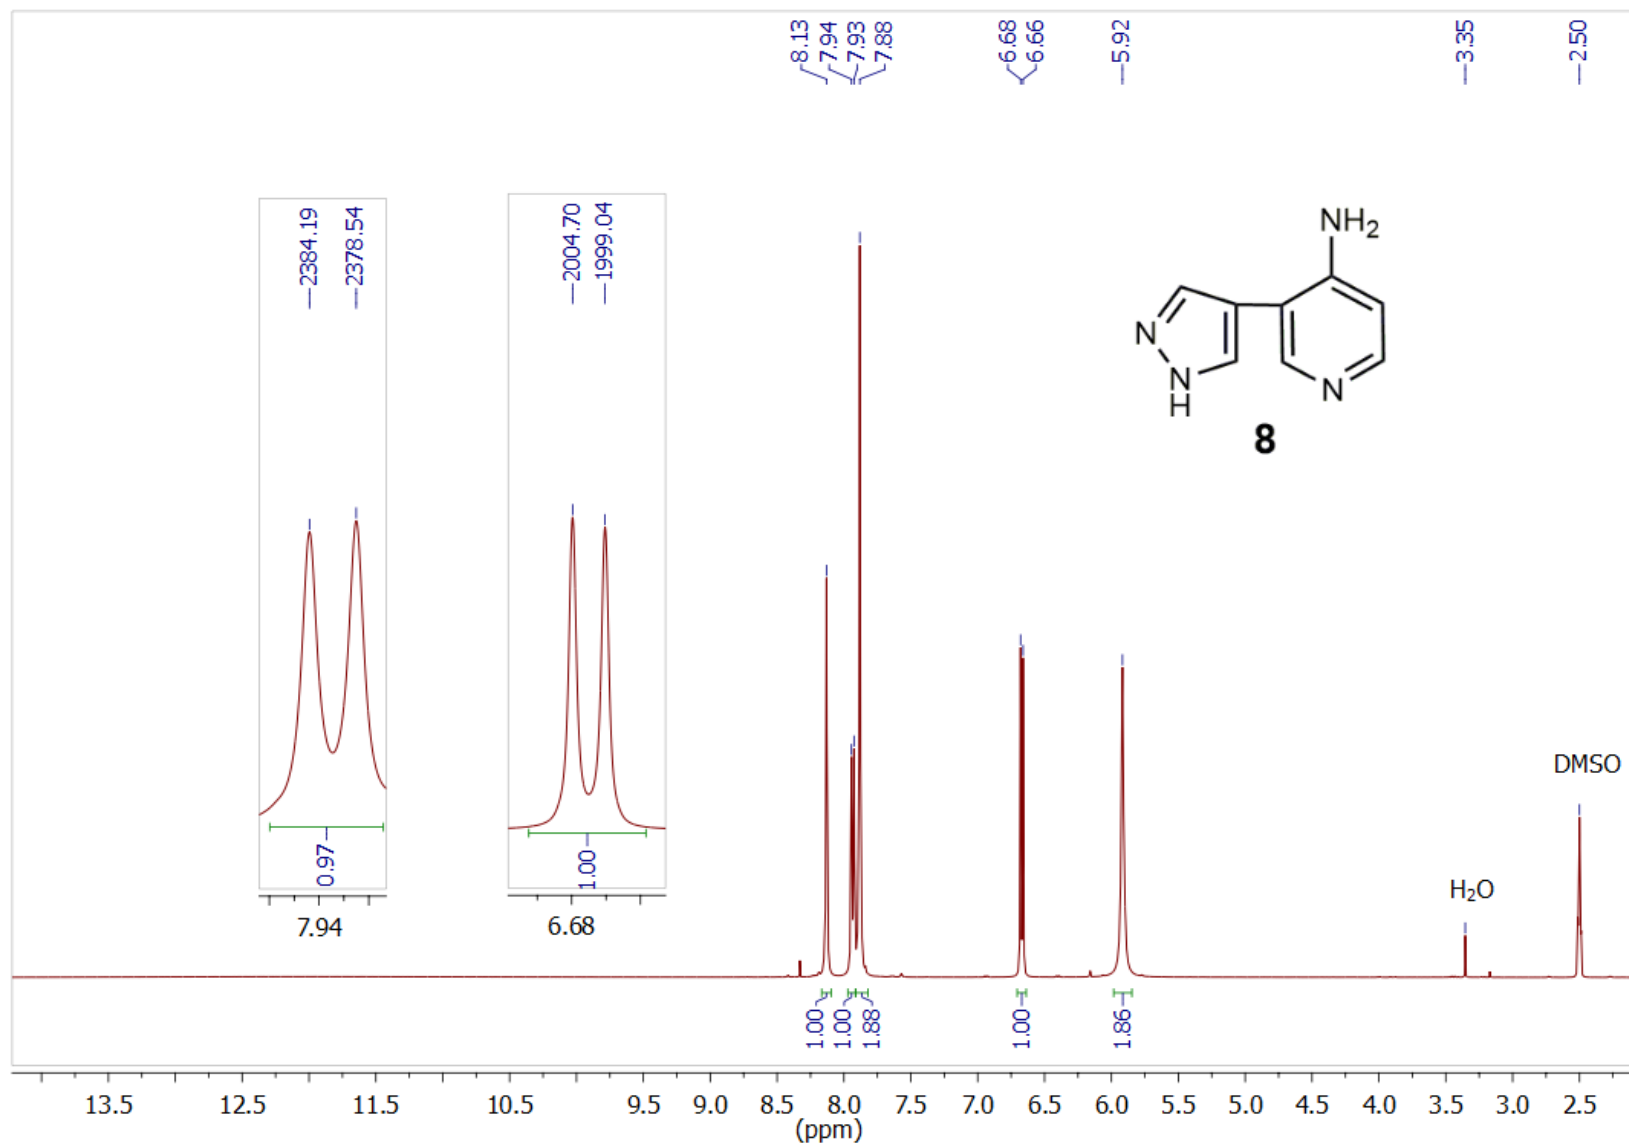

$^1\text{H}$  NMR spectrum (300.1 MHz) of **8** in  $\text{DMSO-}d^6$

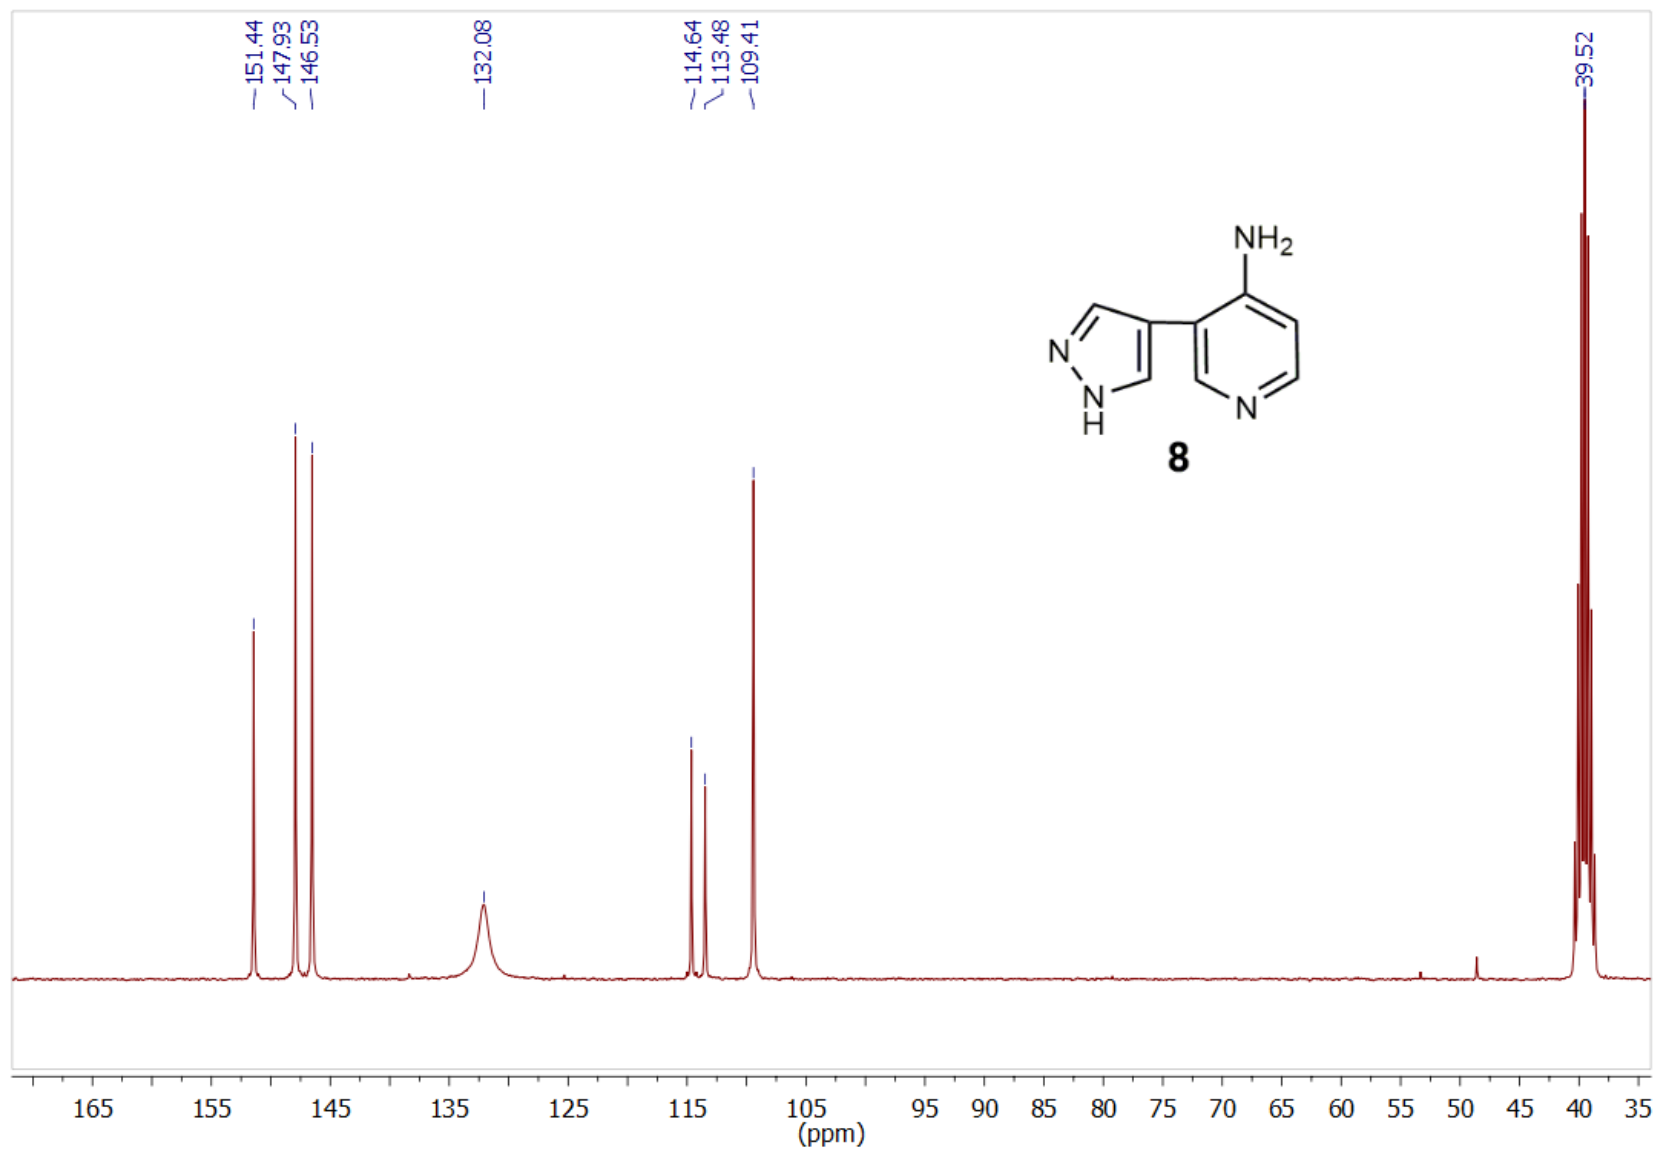

<sup>13</sup>C NMR spectrum (75.5 MHz) of **8** in DMSO-*d*<sub>6</sub>

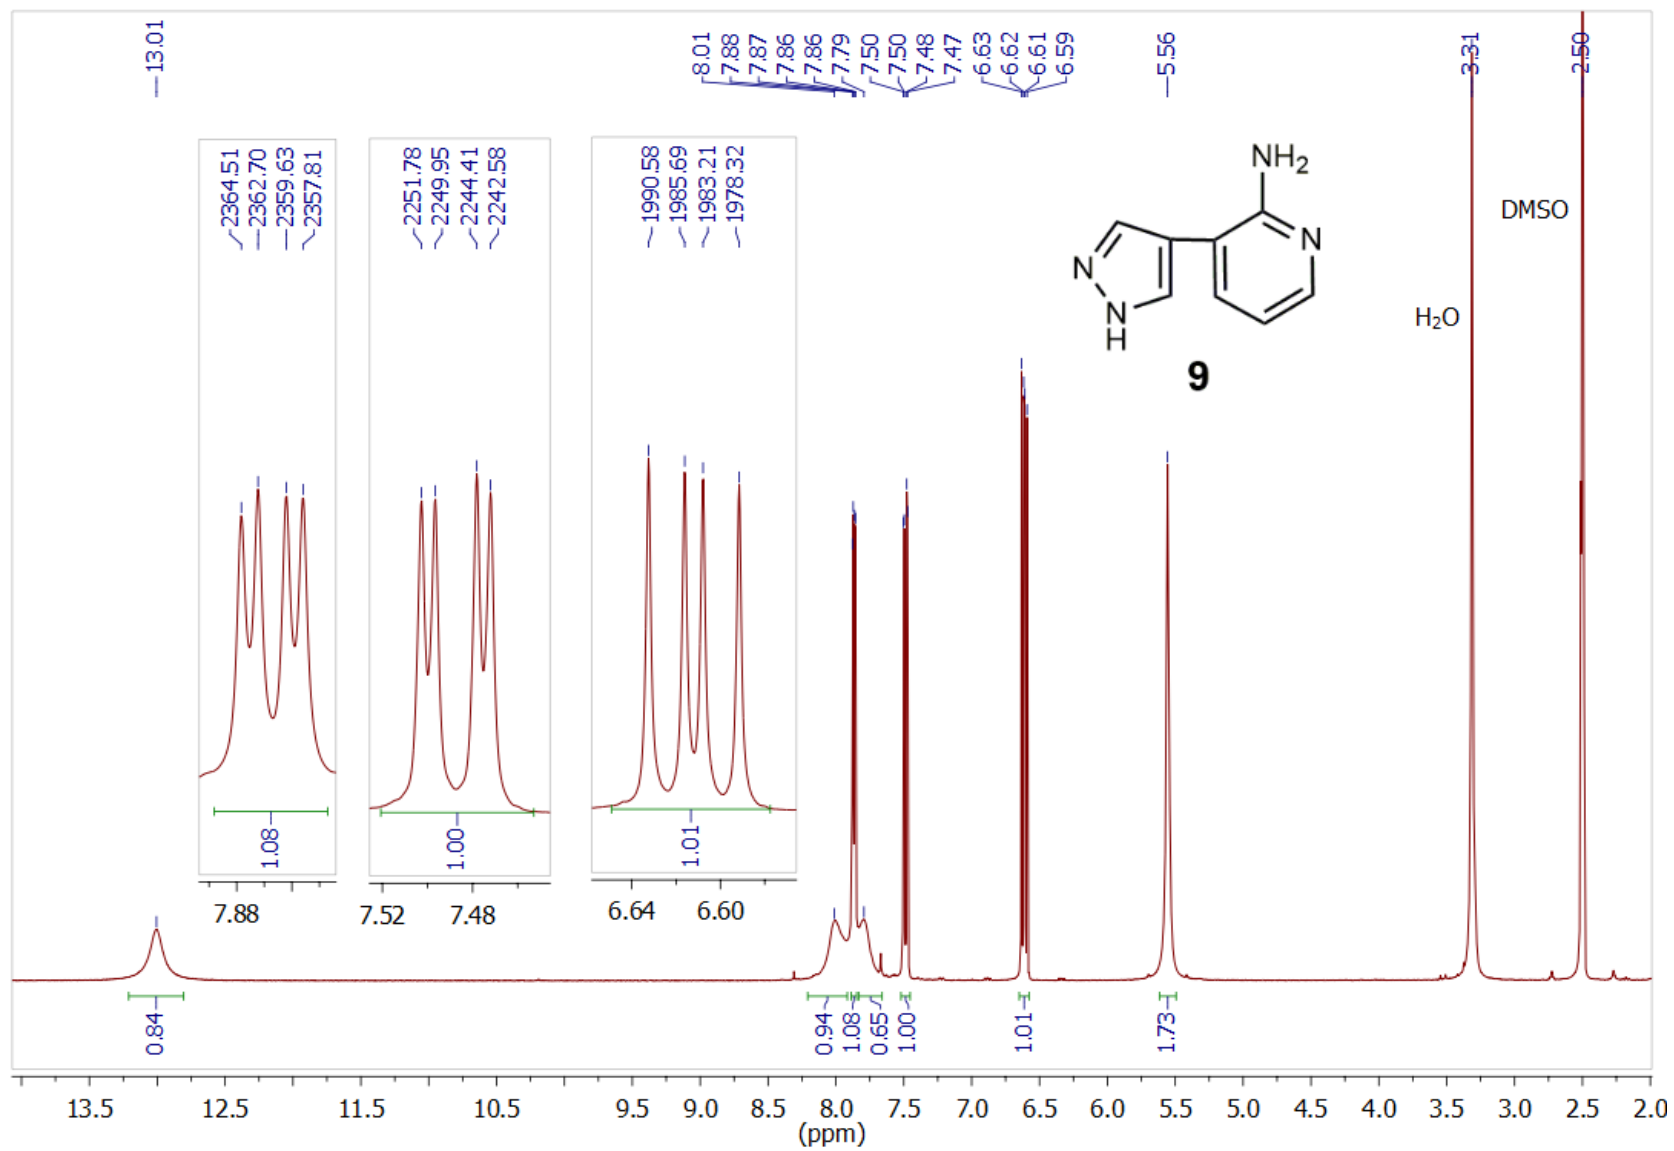

$^1\text{H}$  NMR spectrum (300.1 MHz) of **9** in  $\text{DMSO-}d^6$

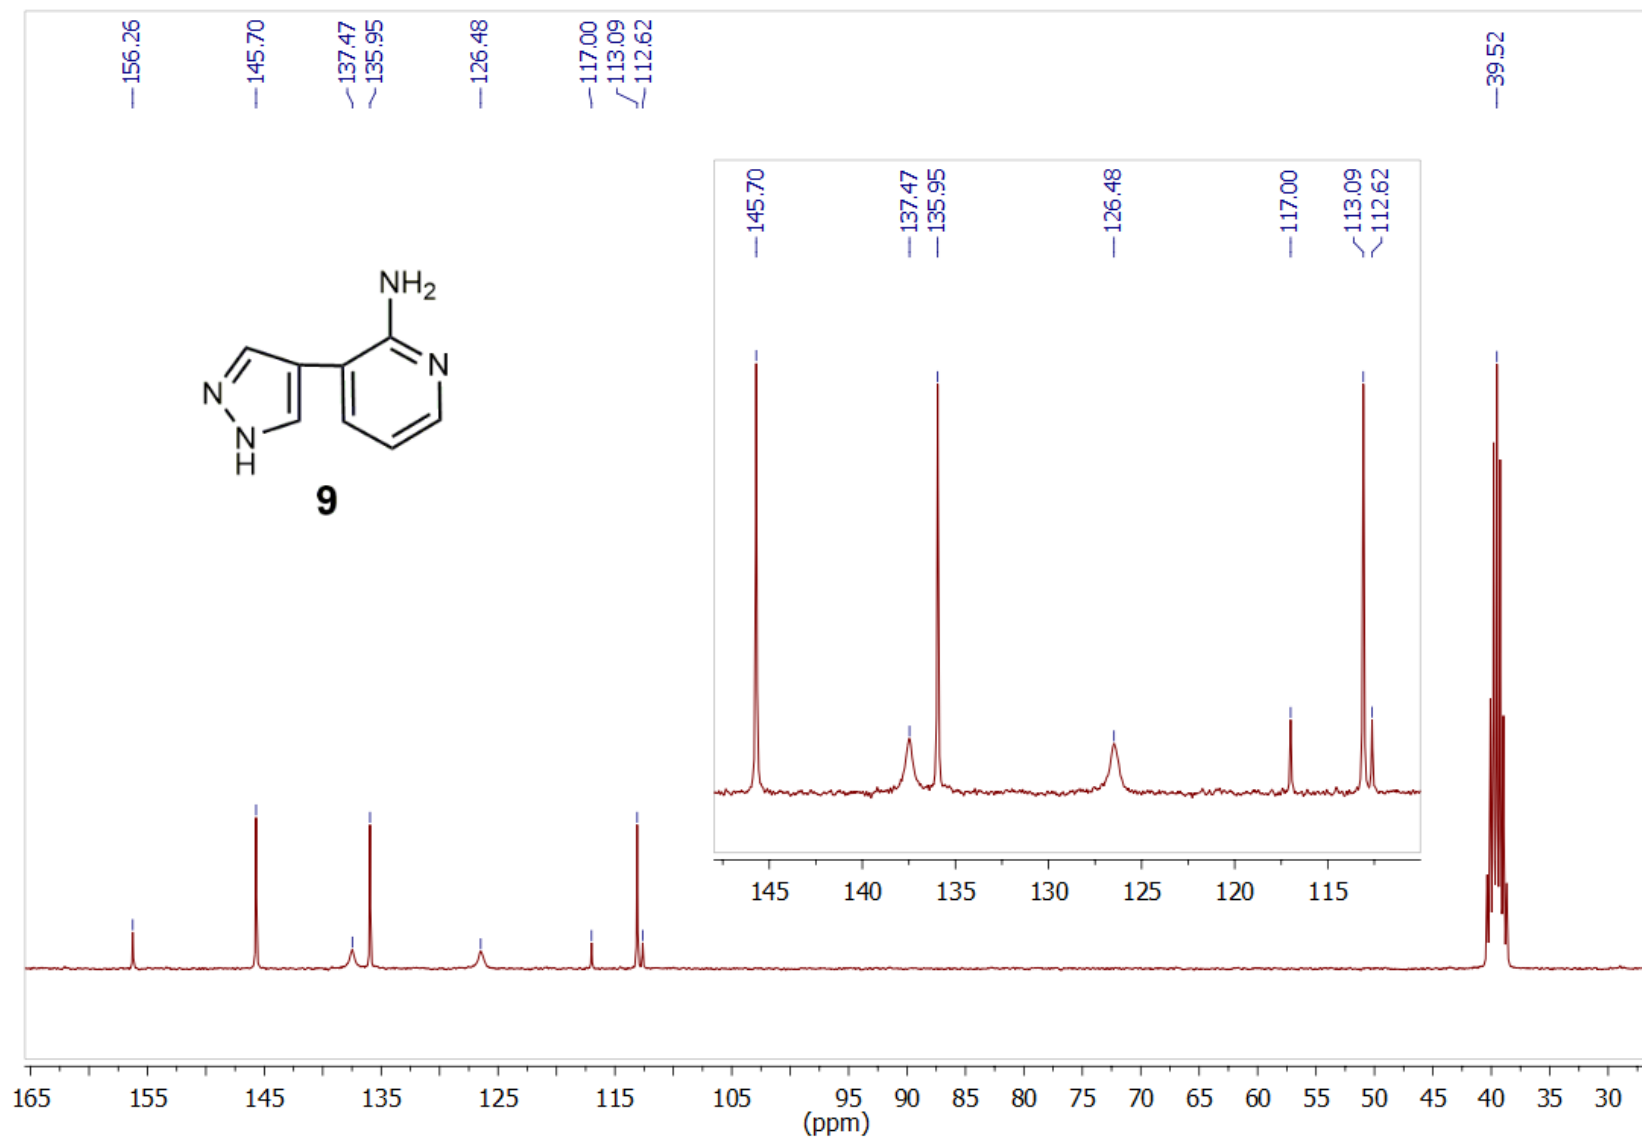

$^{13}\text{C}$  NMR spectrum (75.5 MHz) of **9** in  $\text{DMSO-}d_6$



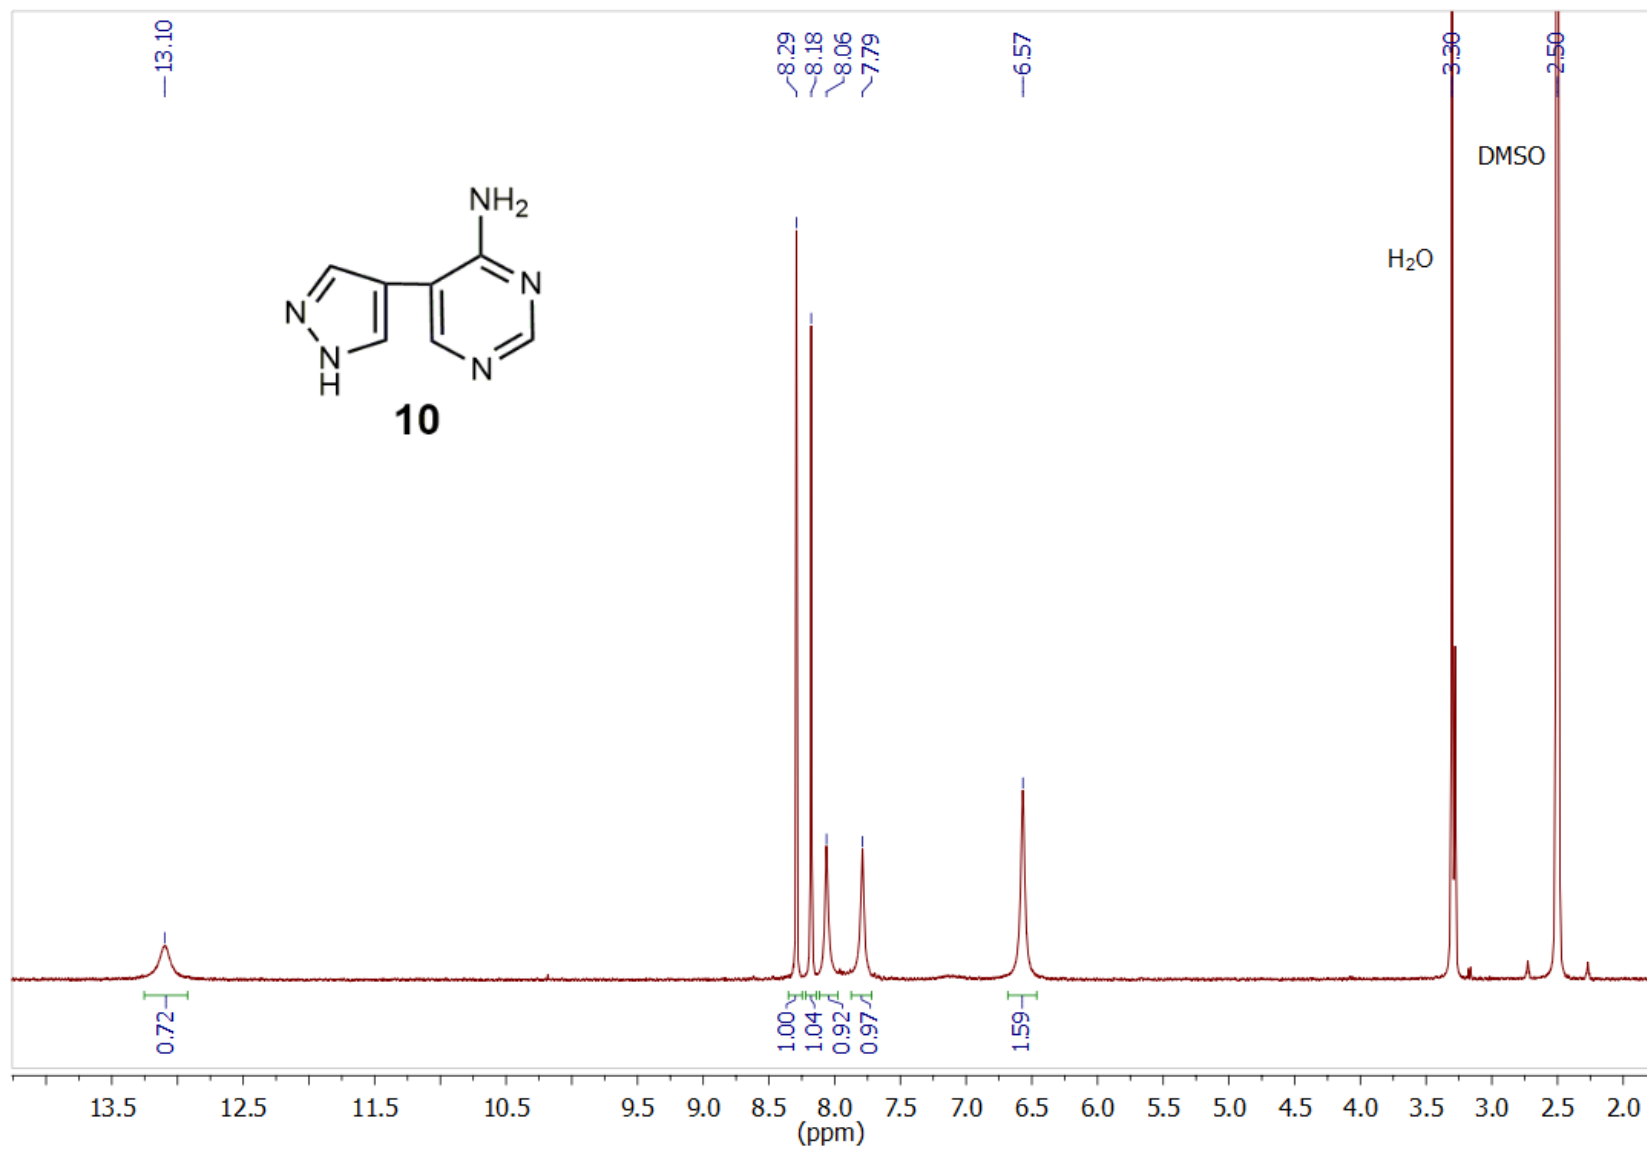

<sup>1</sup>H NMR spectrum (300.1 MHz) of **10** in DMSO-*d*<sub>6</sub>

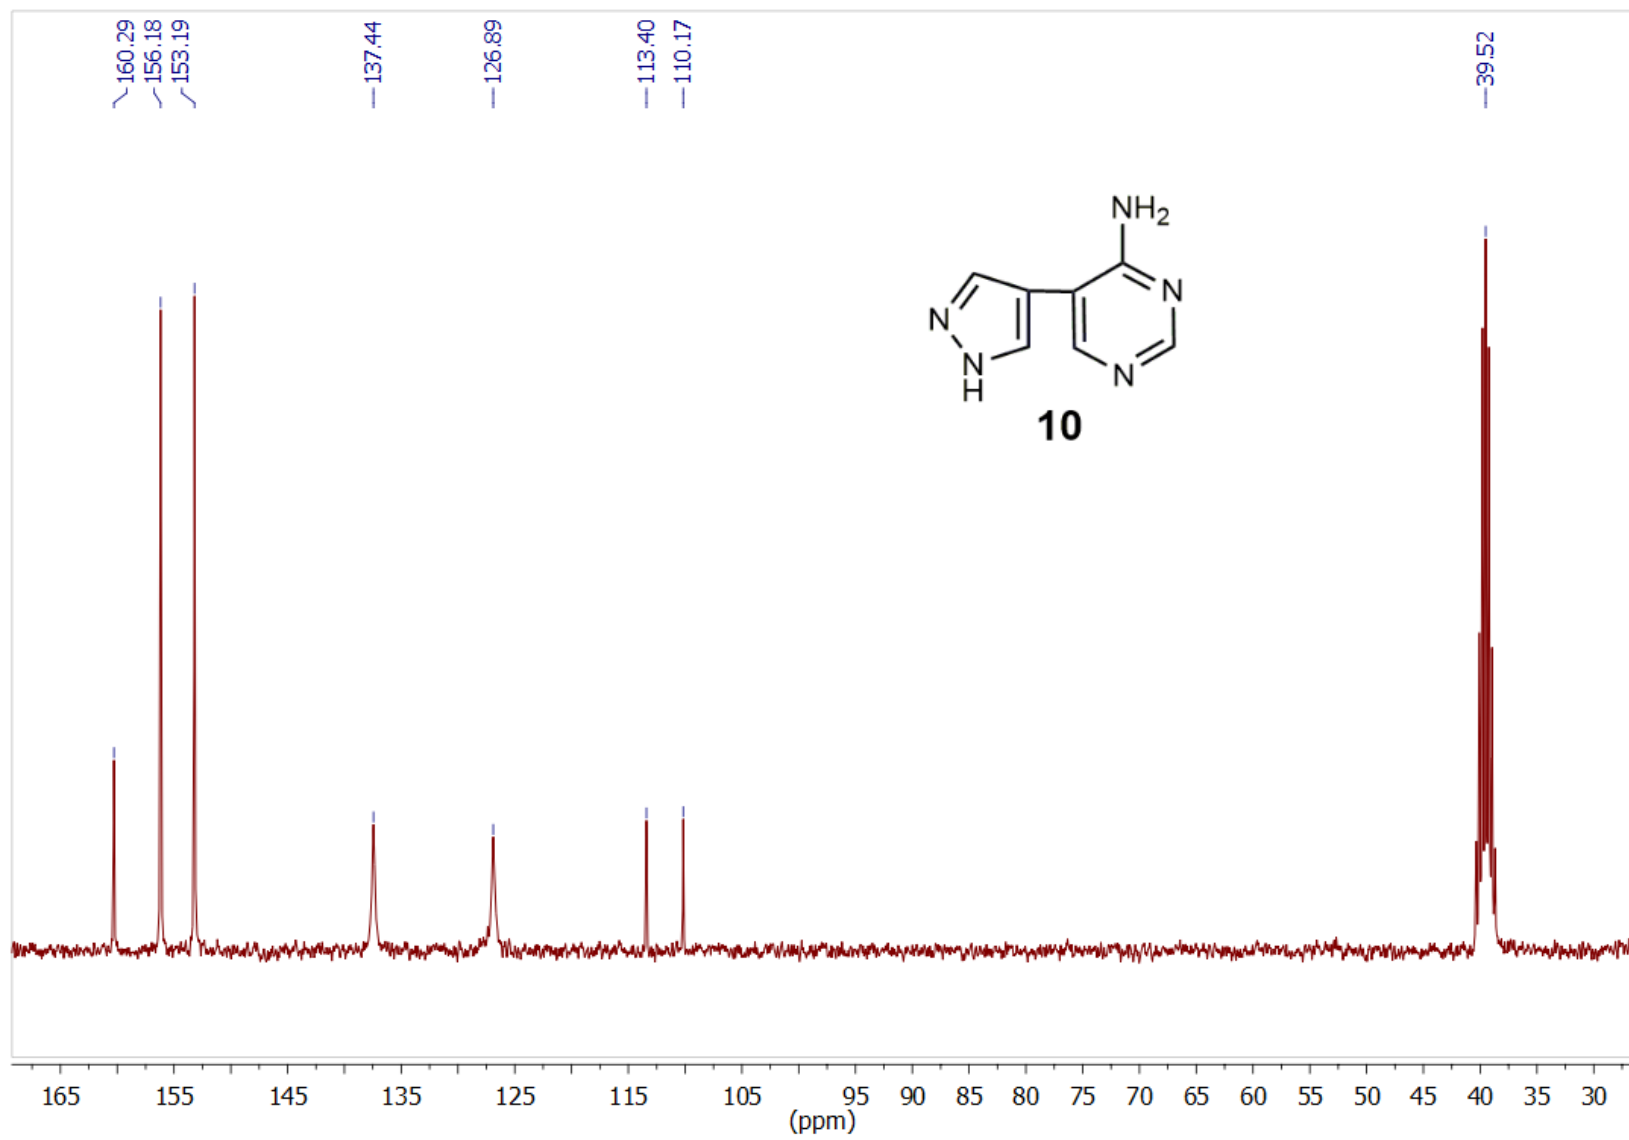

$^{13}\text{C}$  NMR spectrum (75.5 MHz) of **10** in  $\text{DMSO-}d_6$

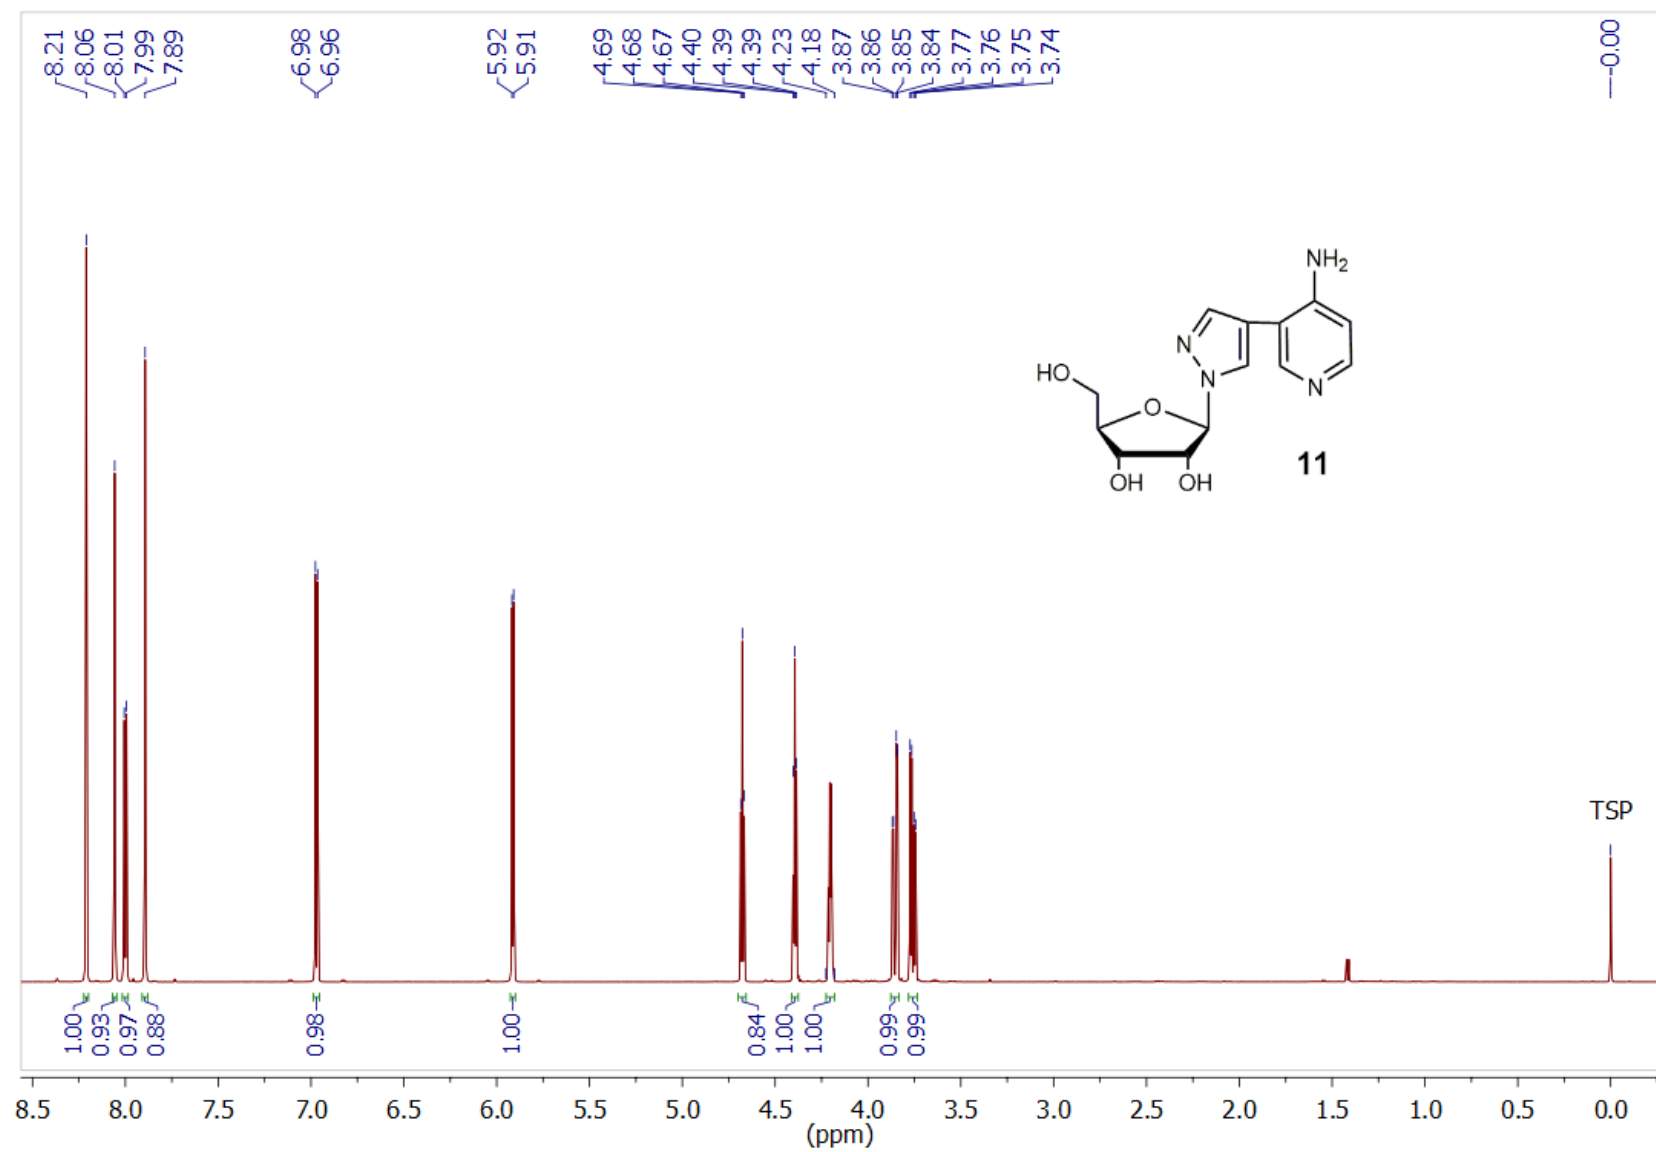

$^1\text{H}$  NMR spectrum (600.2 MHz) of **11** in  $\text{D}_2\text{O}$

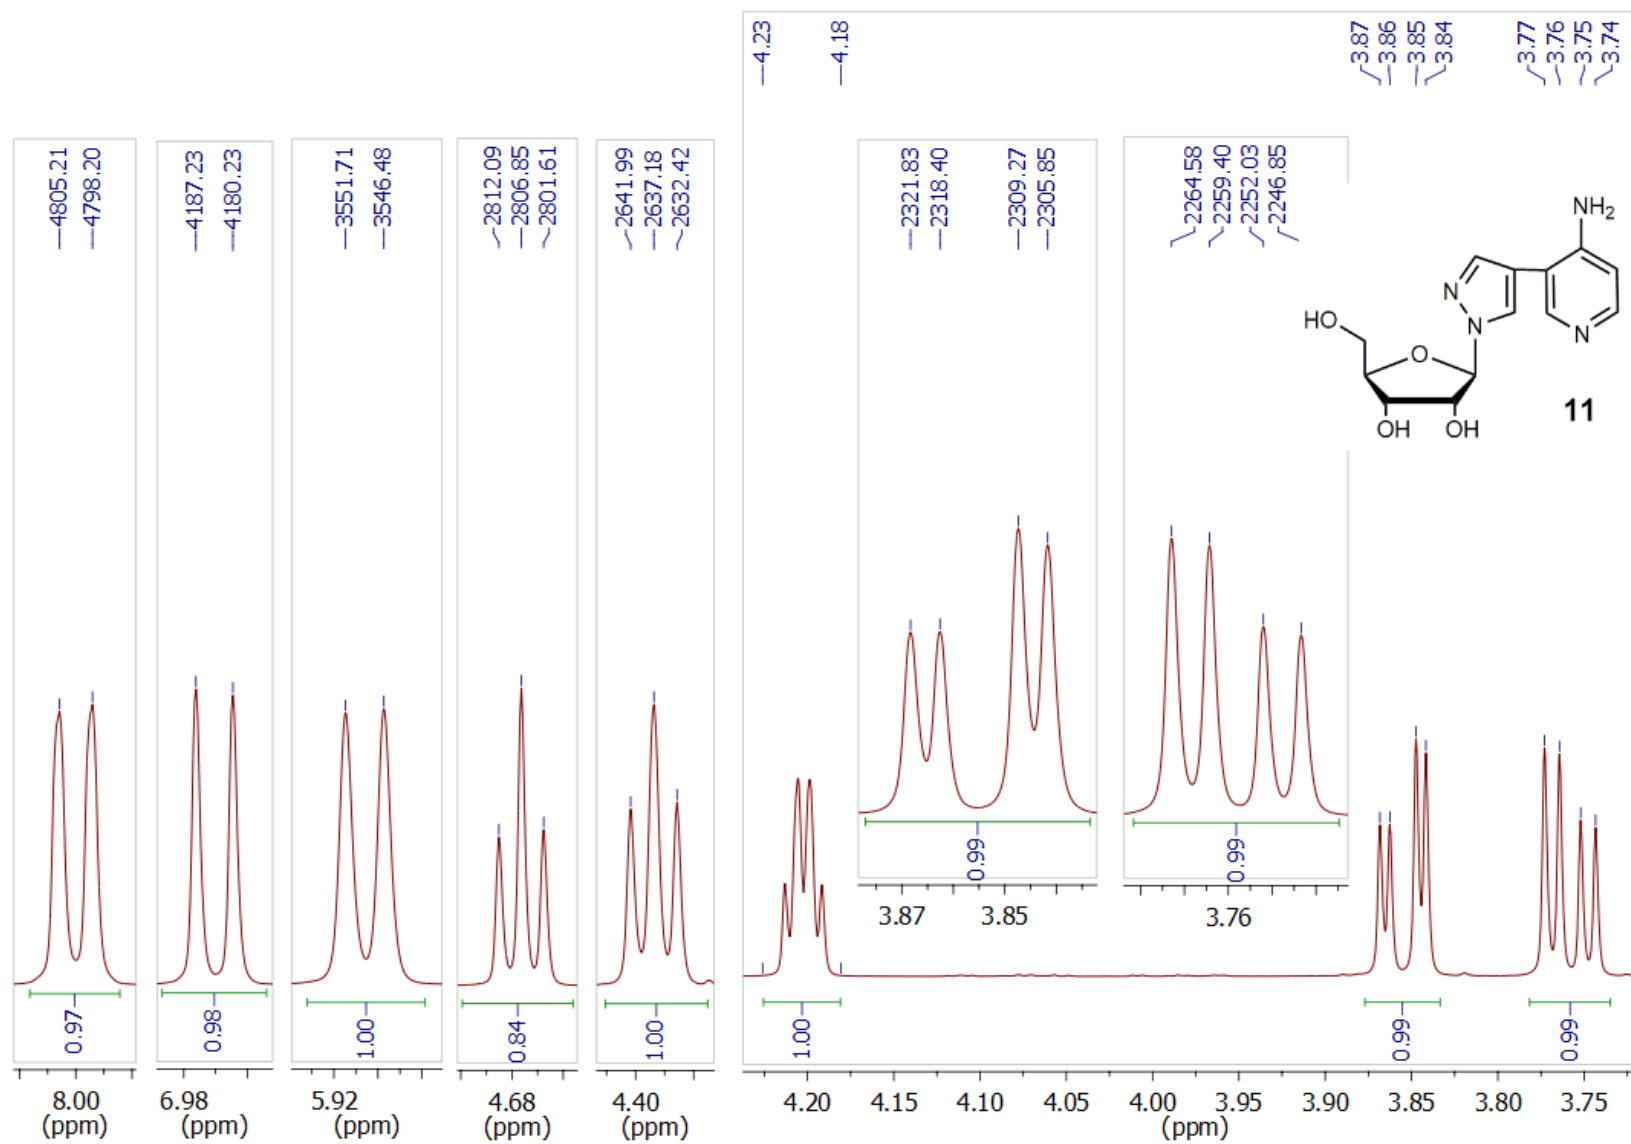

Detailed  $^1\text{H}$  NMR spectrum (600.2 MHz) of **11** in  $\text{D}_2\text{O}$

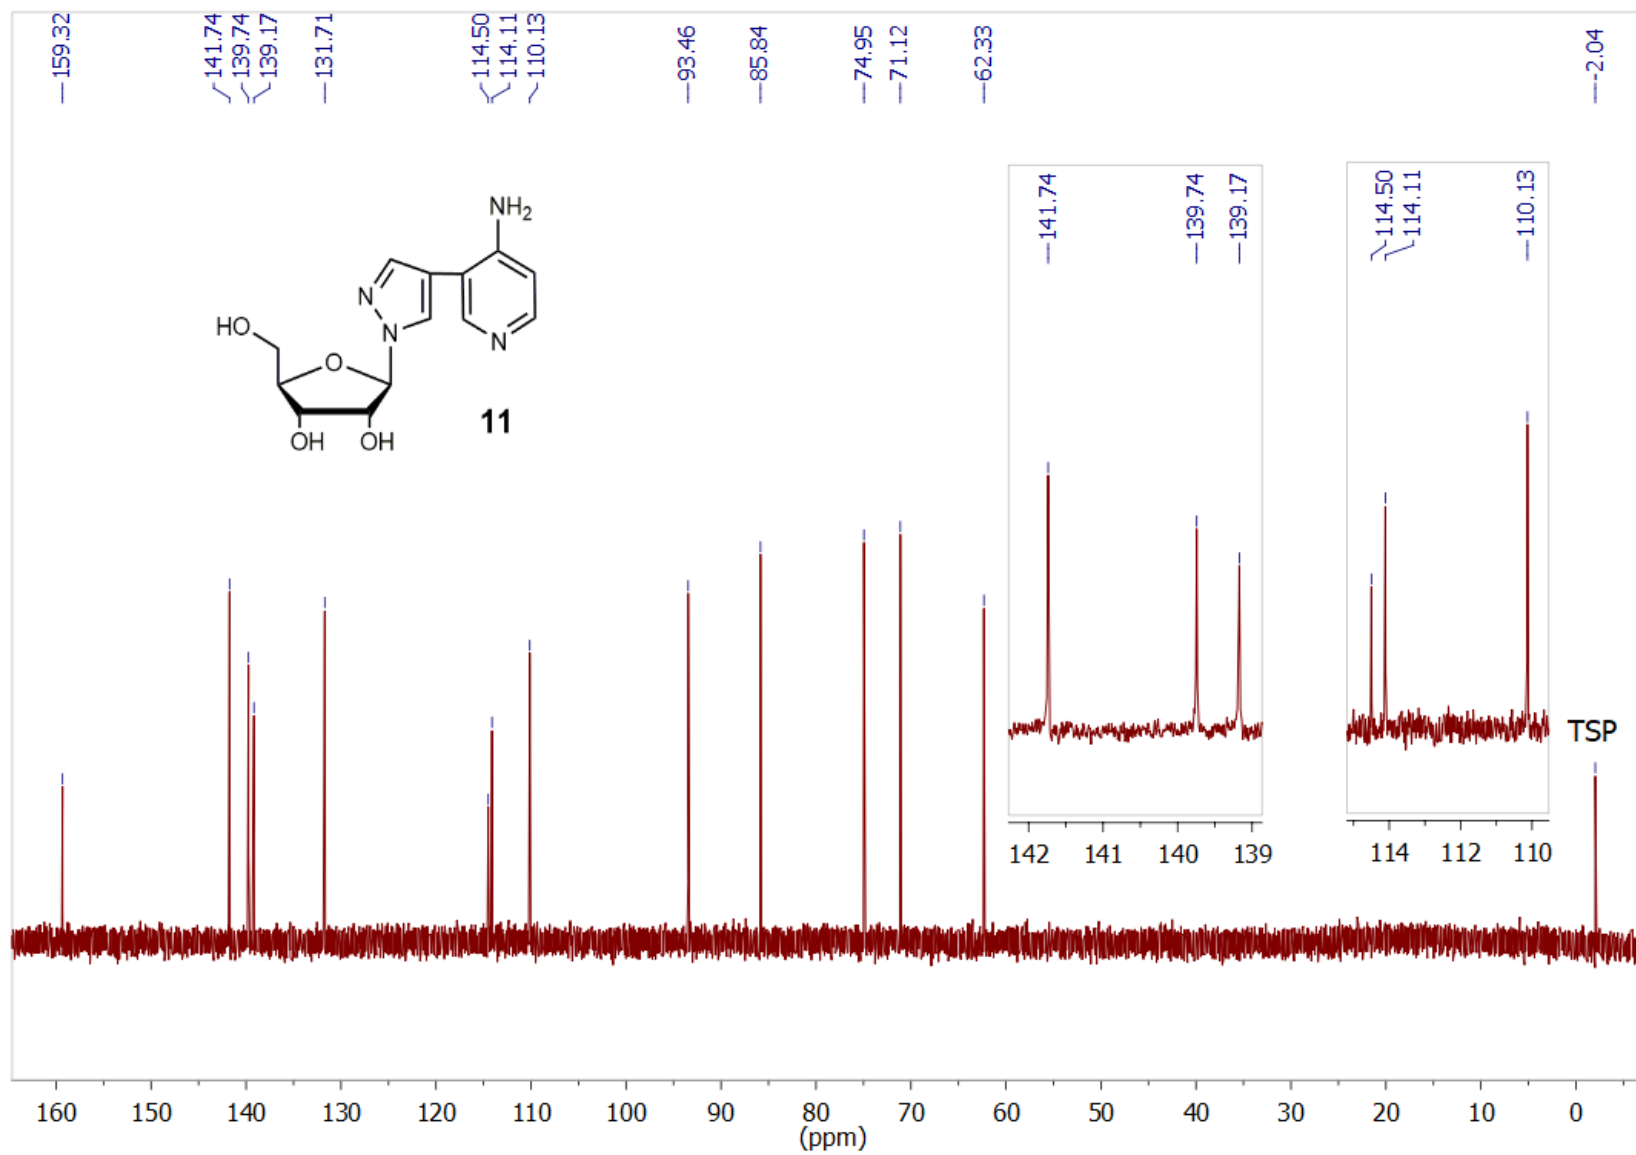

$^{13}\text{C}$  NMR spectrum (150.9 MHz) of **11** in  $\text{D}_2\text{O}$

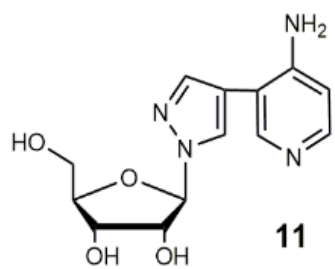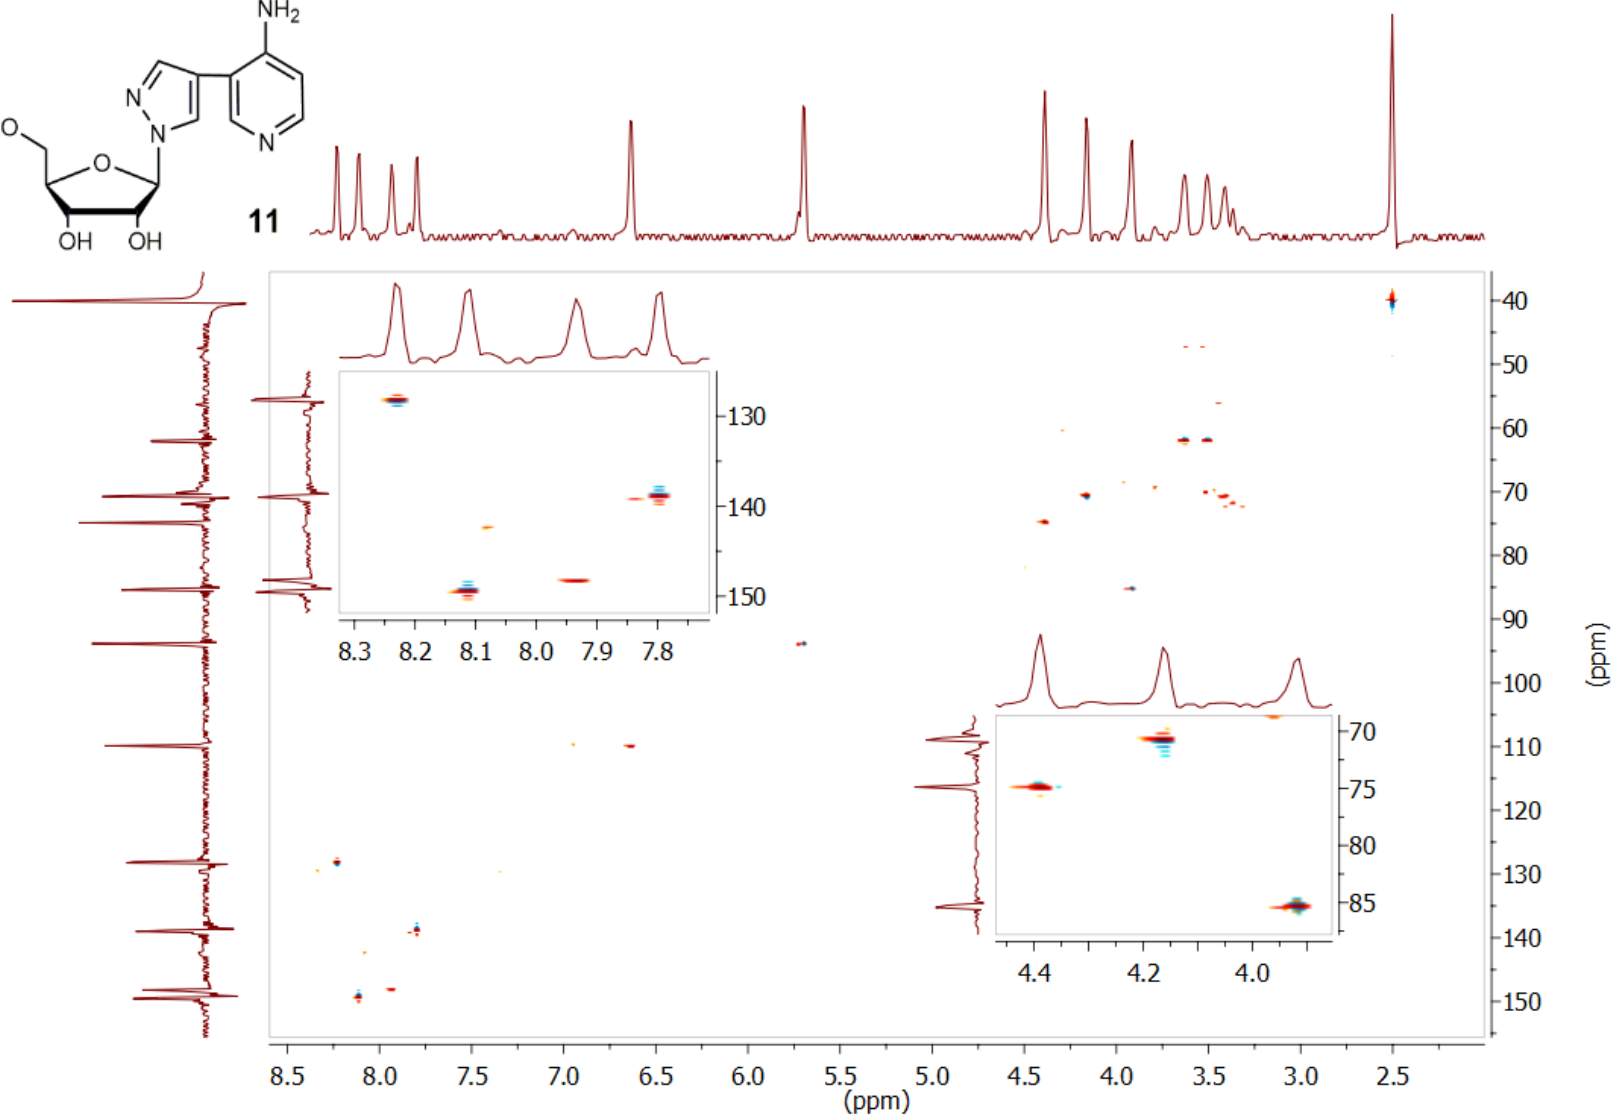

$^1\text{H}$ - $^{13}\text{C}$  HSQC (700.2 MHz) spectrum of **11** in DMSO- $d_6$

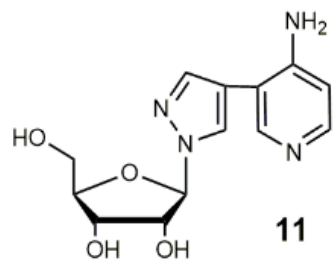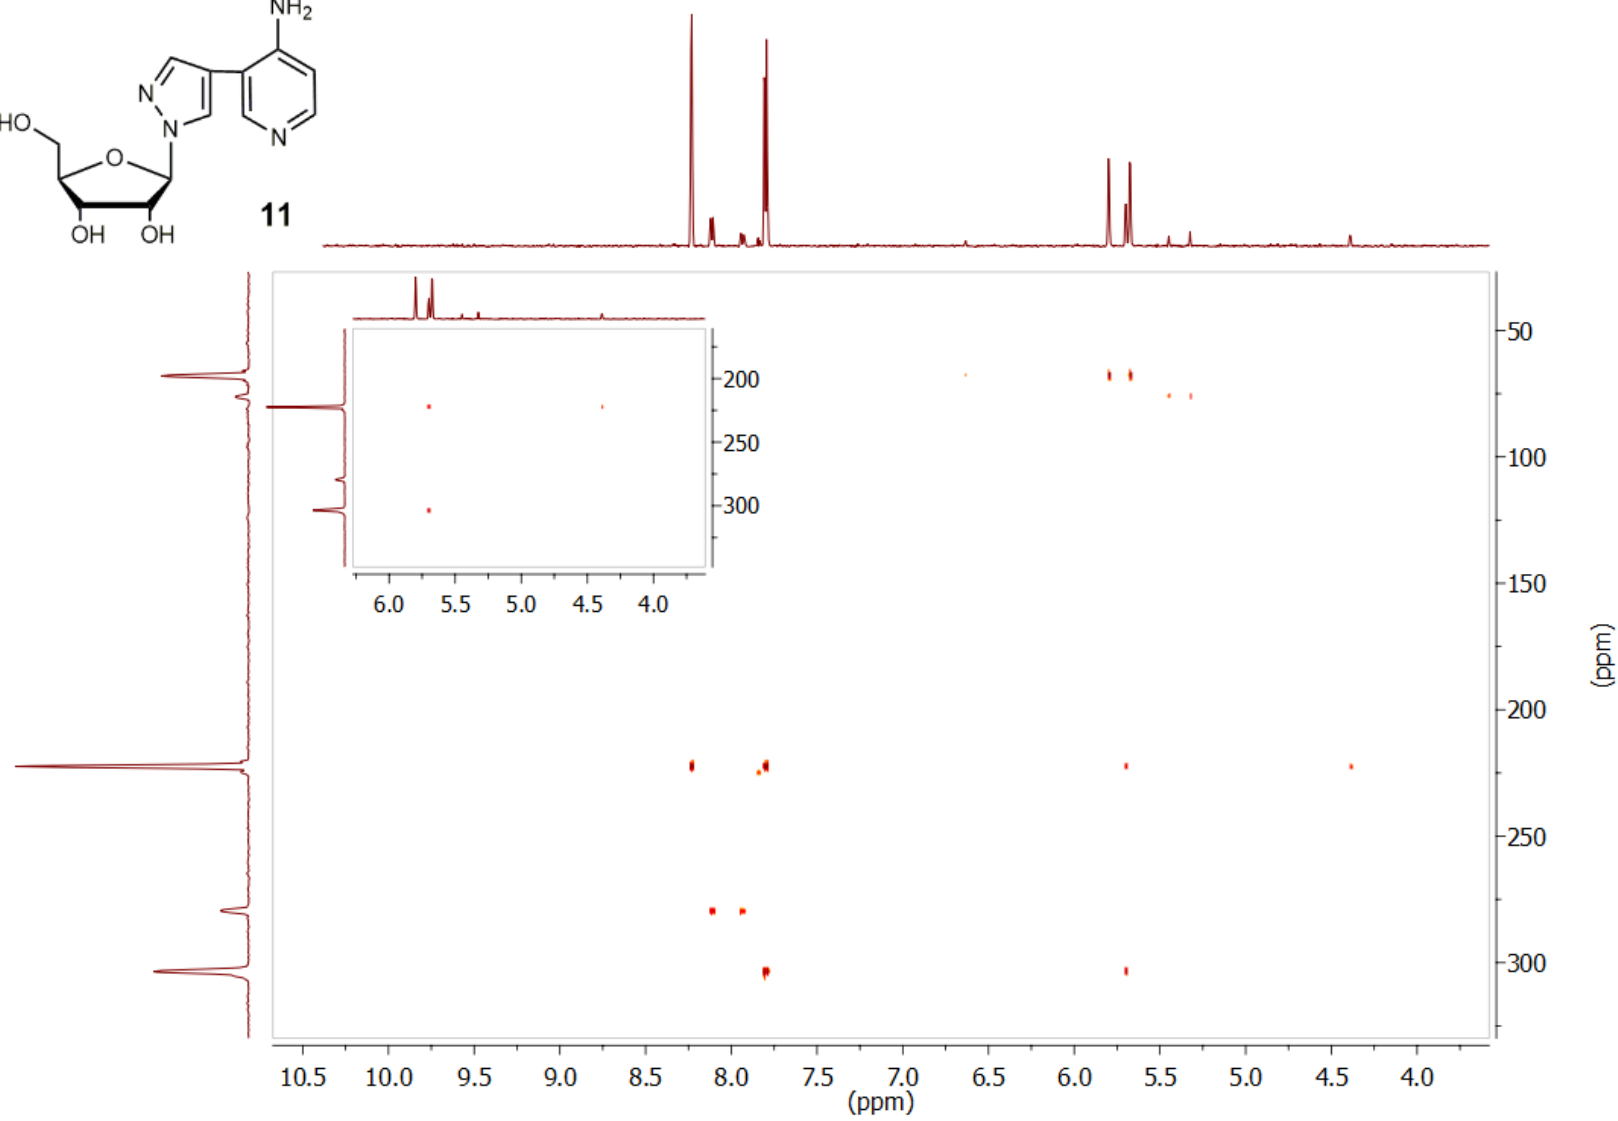

Superimposed  $^1\text{H}$ - $^{15}\text{N}$  spectra (700.2 MHz) of **11** in  $\text{DMSO-}d_6$

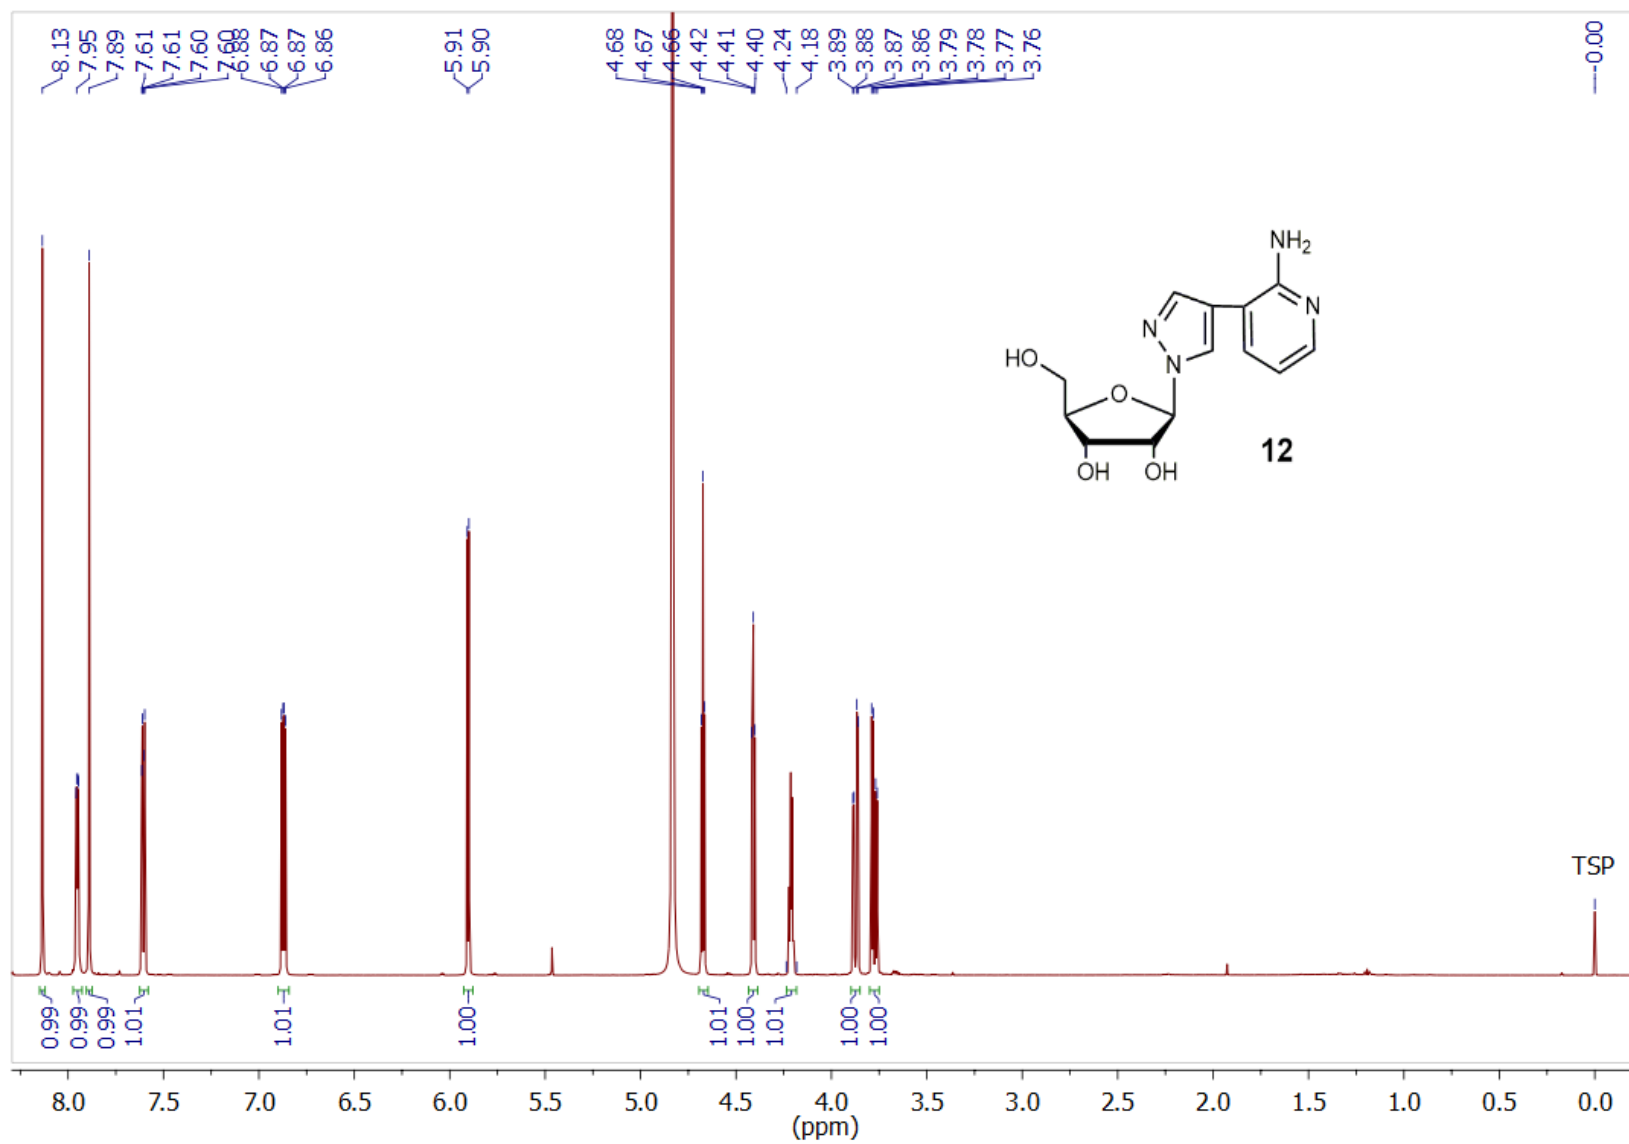

<sup>1</sup>H NMR spectrum (600.2 MHz) of **12** in D<sub>2</sub>O



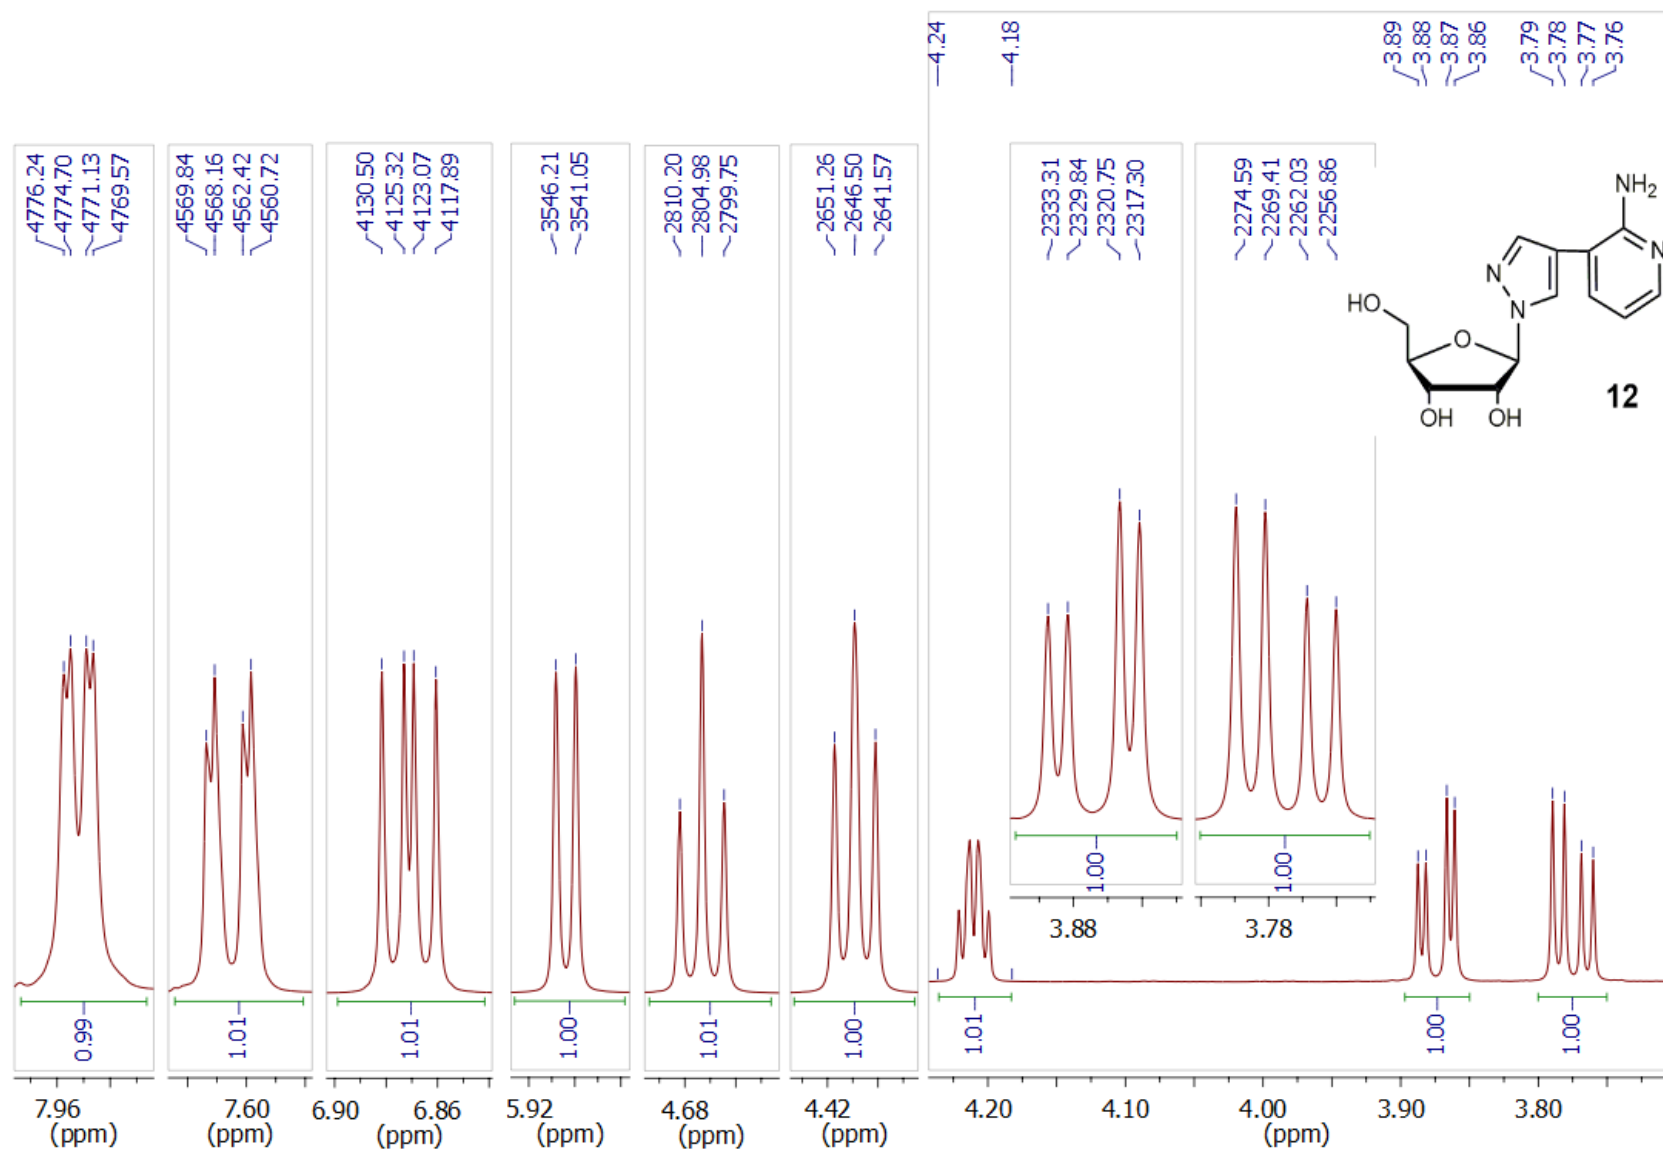

Detailed  $^1\text{H}$  NMR spectrum (600.2 MHz) of **12** in  $\text{D}_2\text{O}$

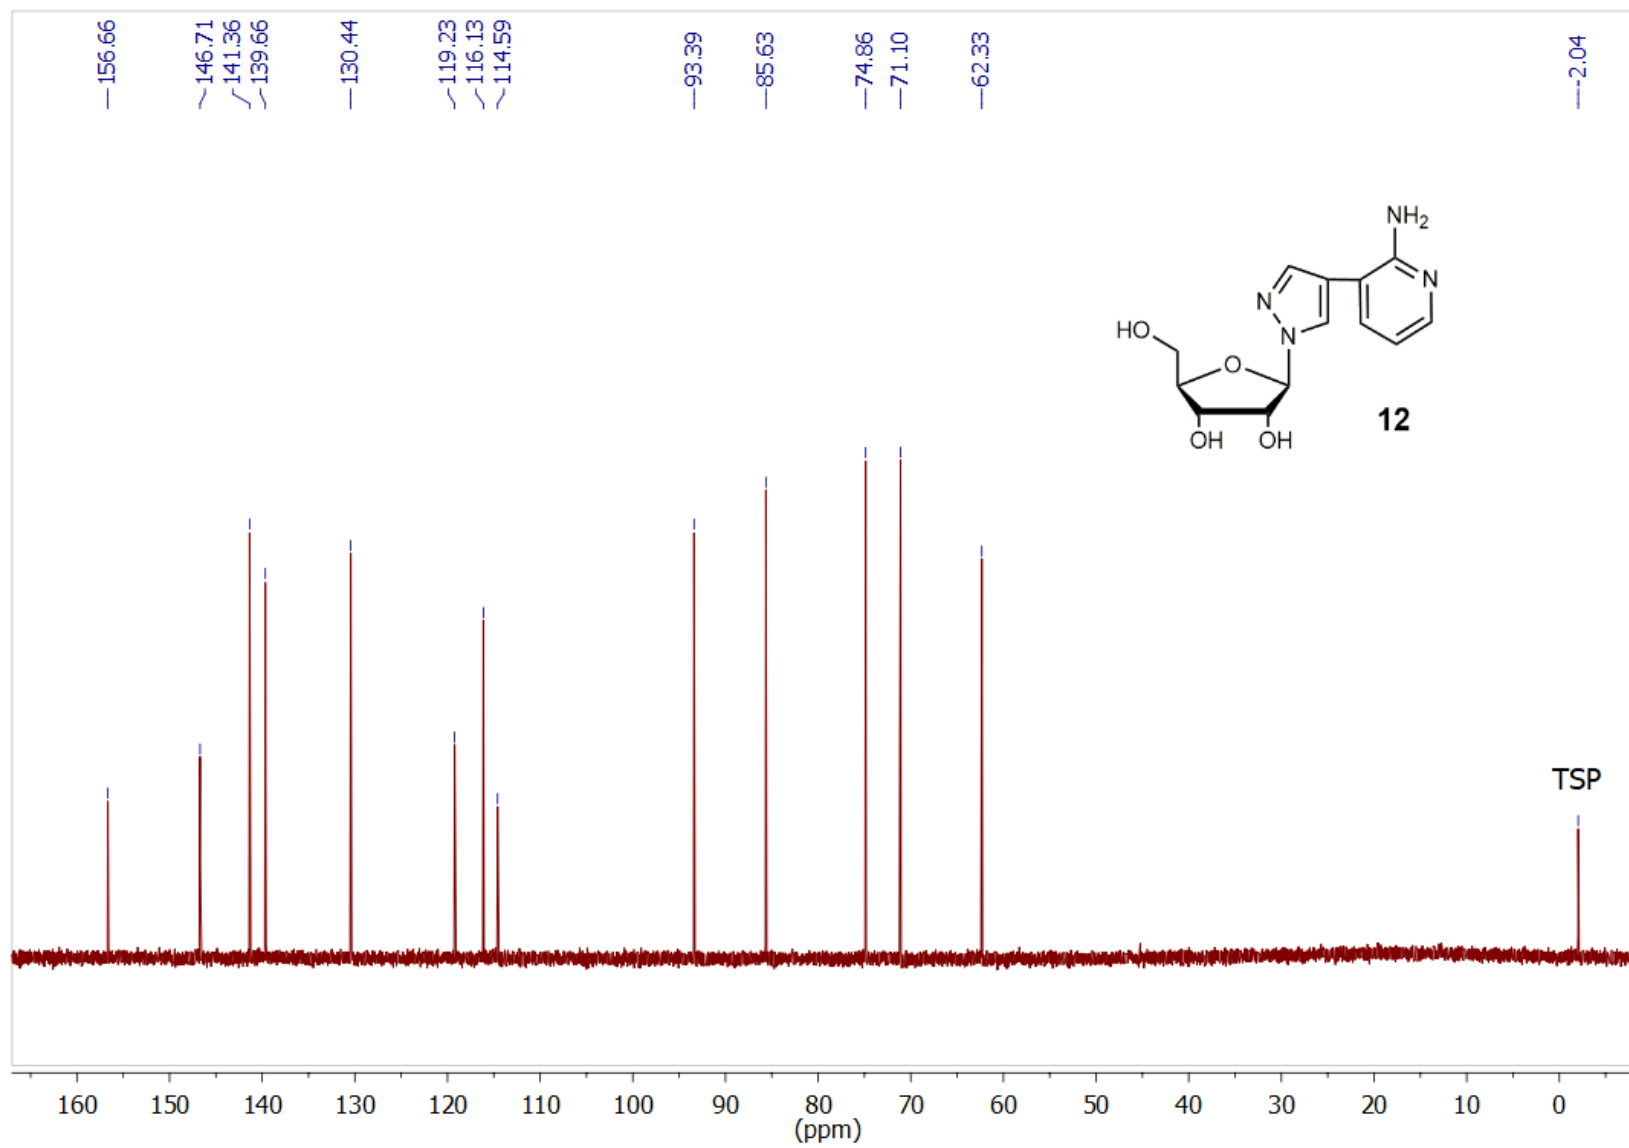

$^{13}\text{C}$  NMR spectrum (150.9 MHz) of **12** in  $\text{D}_2\text{O}$

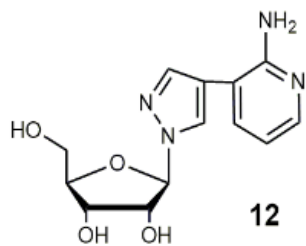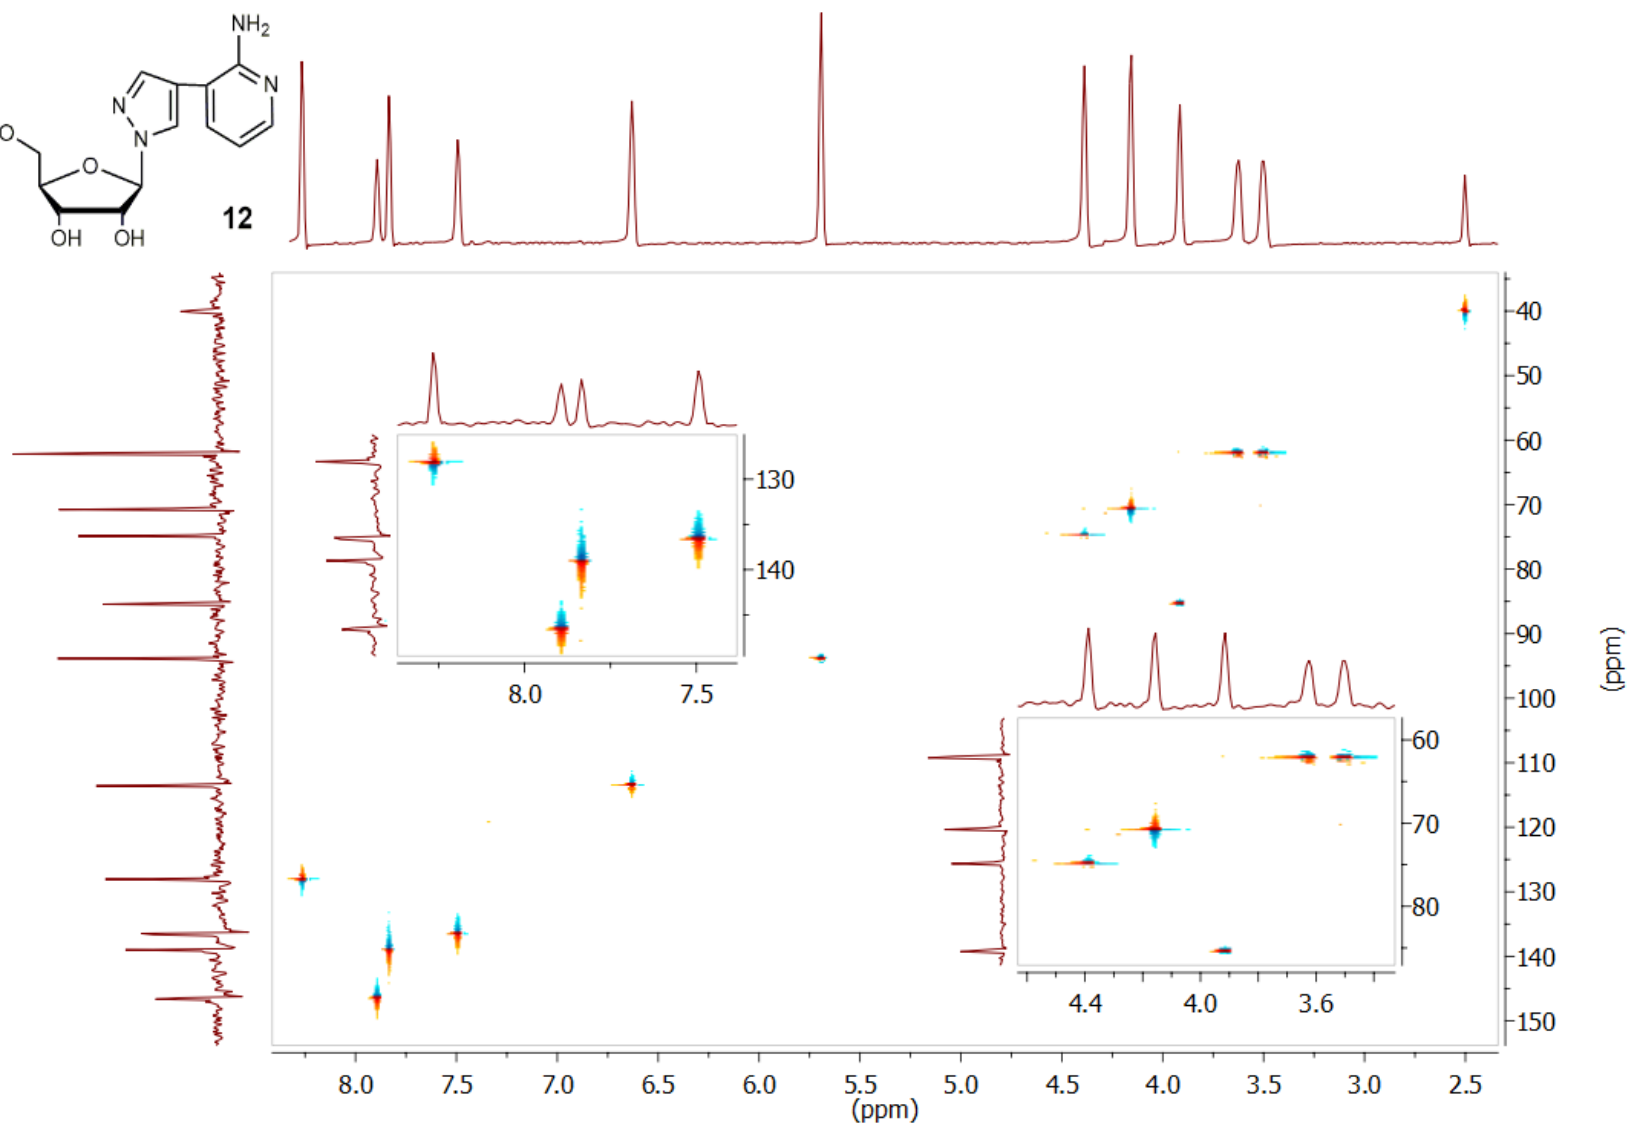

$^1\text{H}$ - $^{13}\text{C}$  HSQC spectrum (700.2 MHz) of **12** in  $\text{DMSO-}d_6$

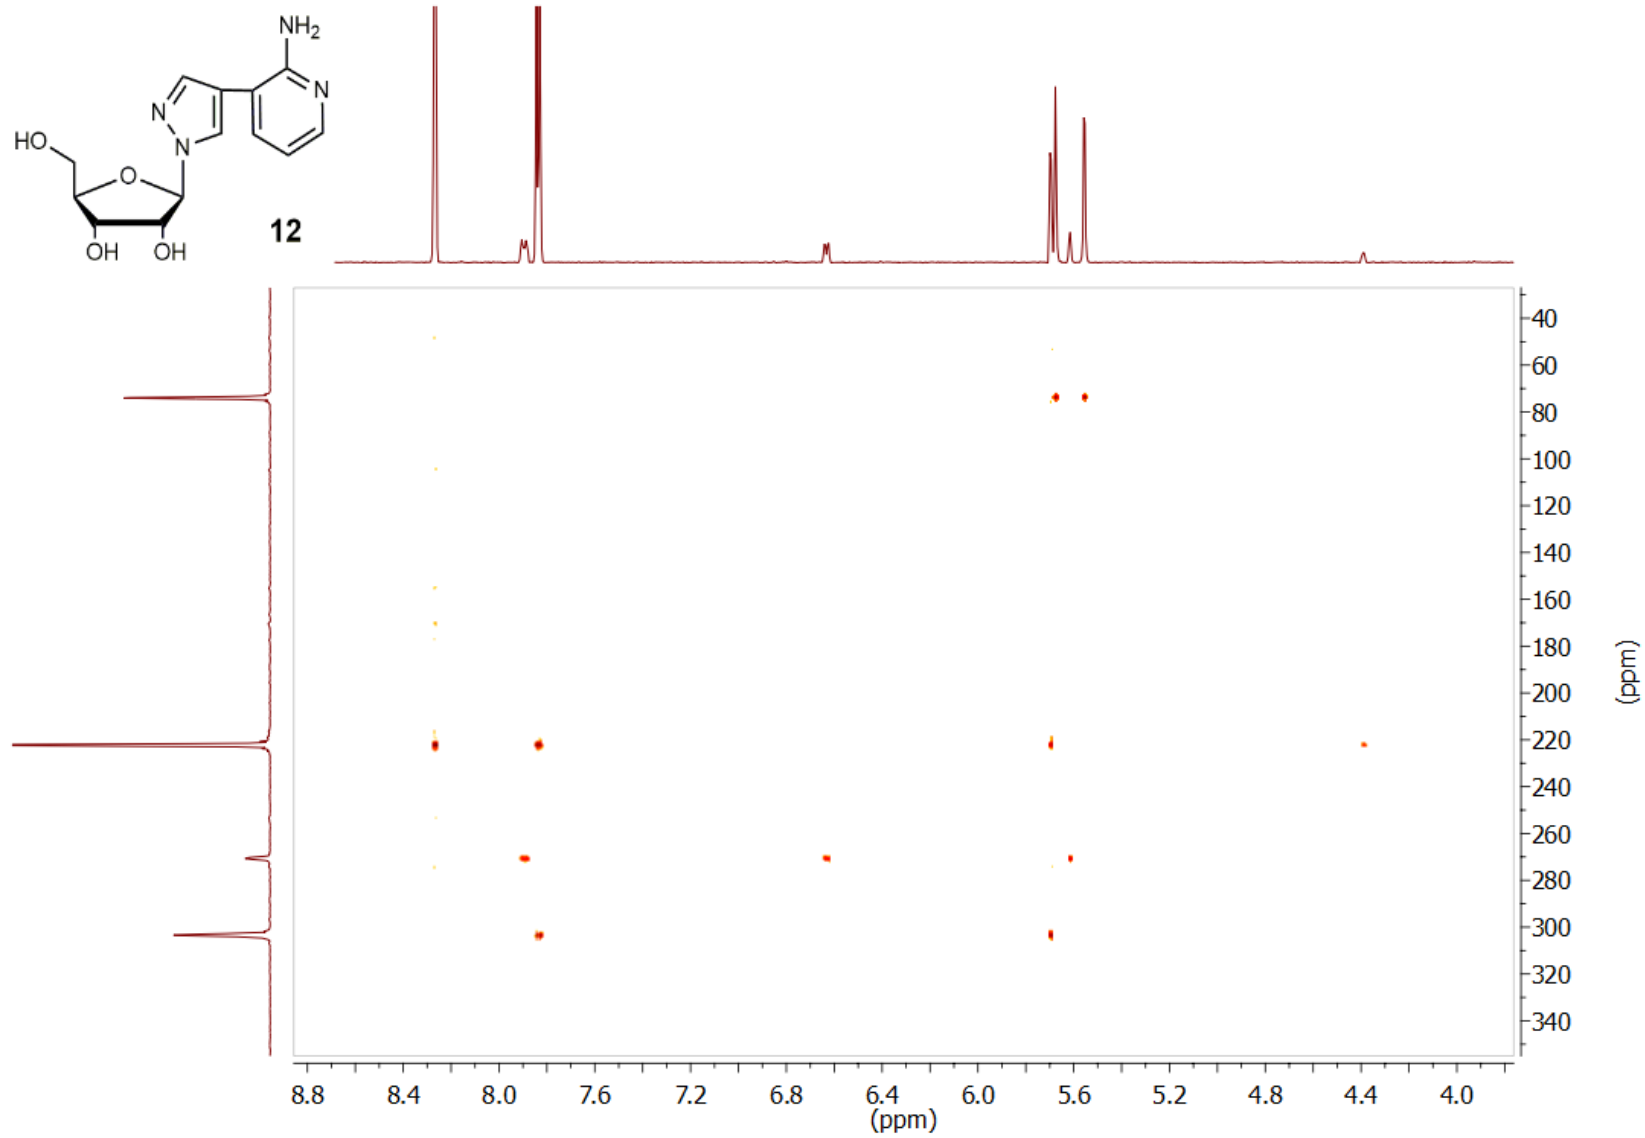

Superimposed  $^1\text{H}$ - $^{15}\text{N}$  spectra (700.2 MHz) of **12** in  $\text{DMSO-}d_6$

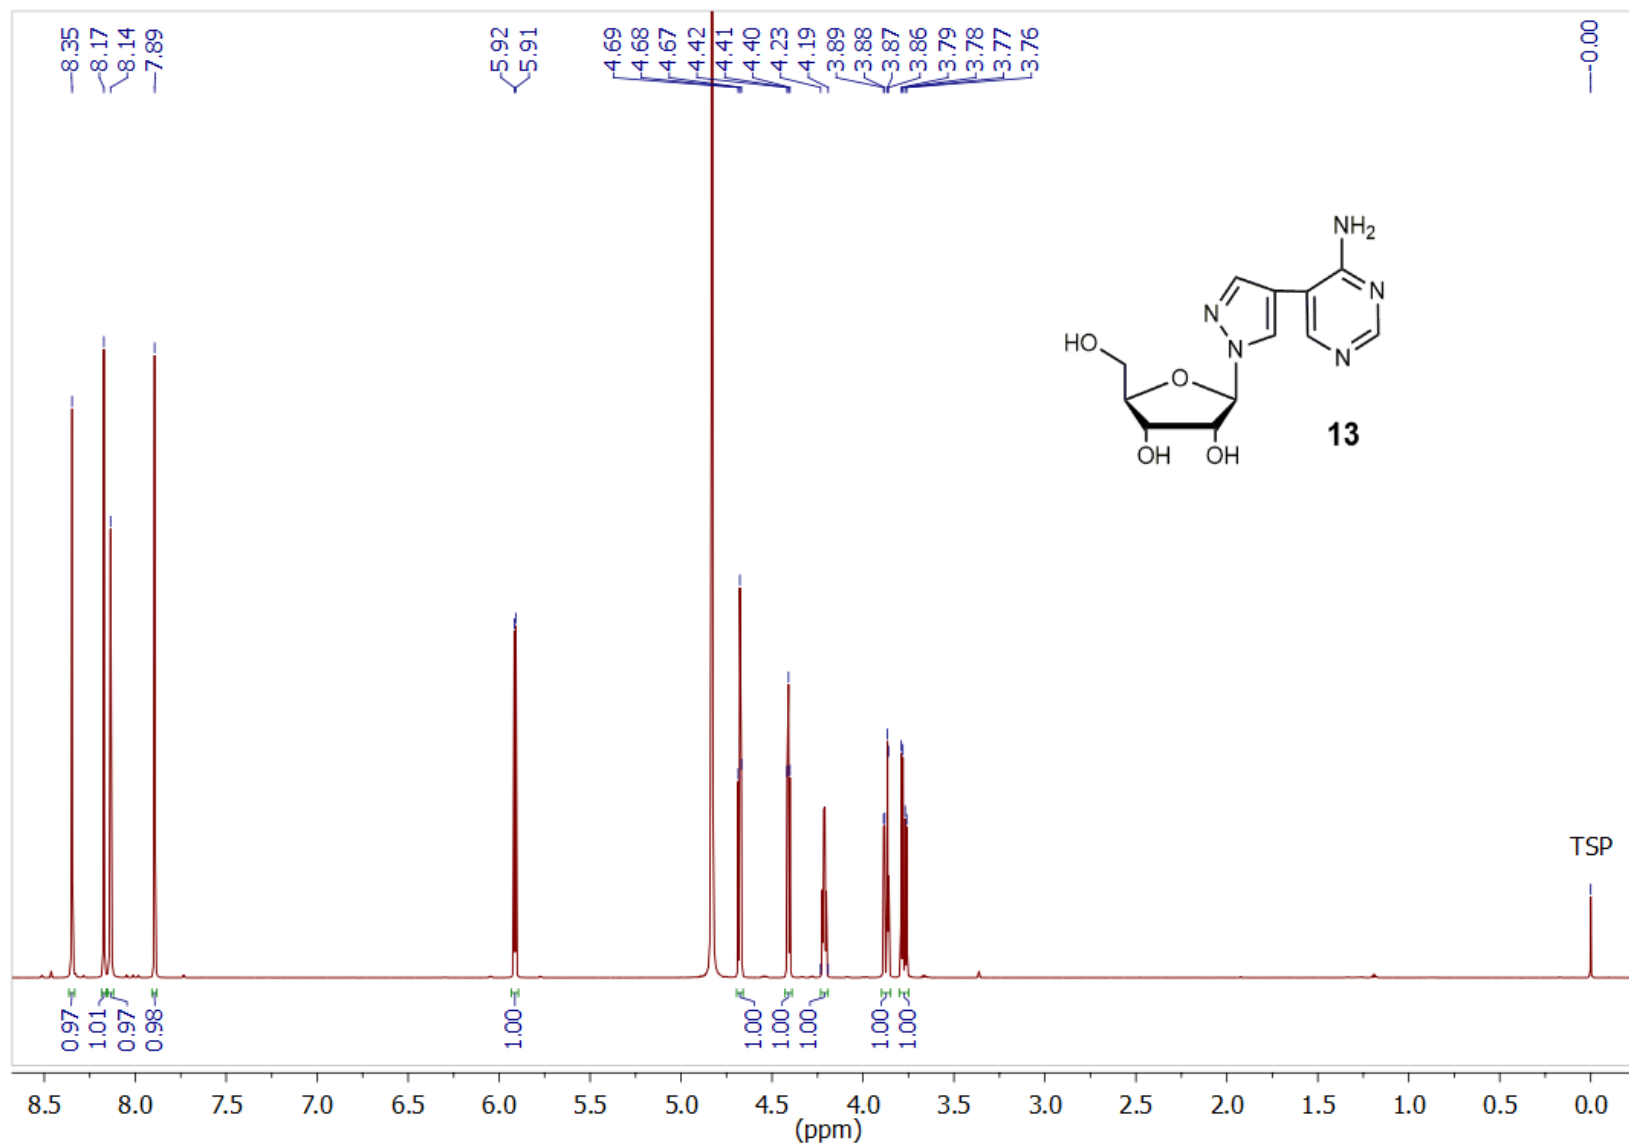

<sup>1</sup>H NMR spectrum (600.2 MHz) of **13** in D<sub>2</sub>O

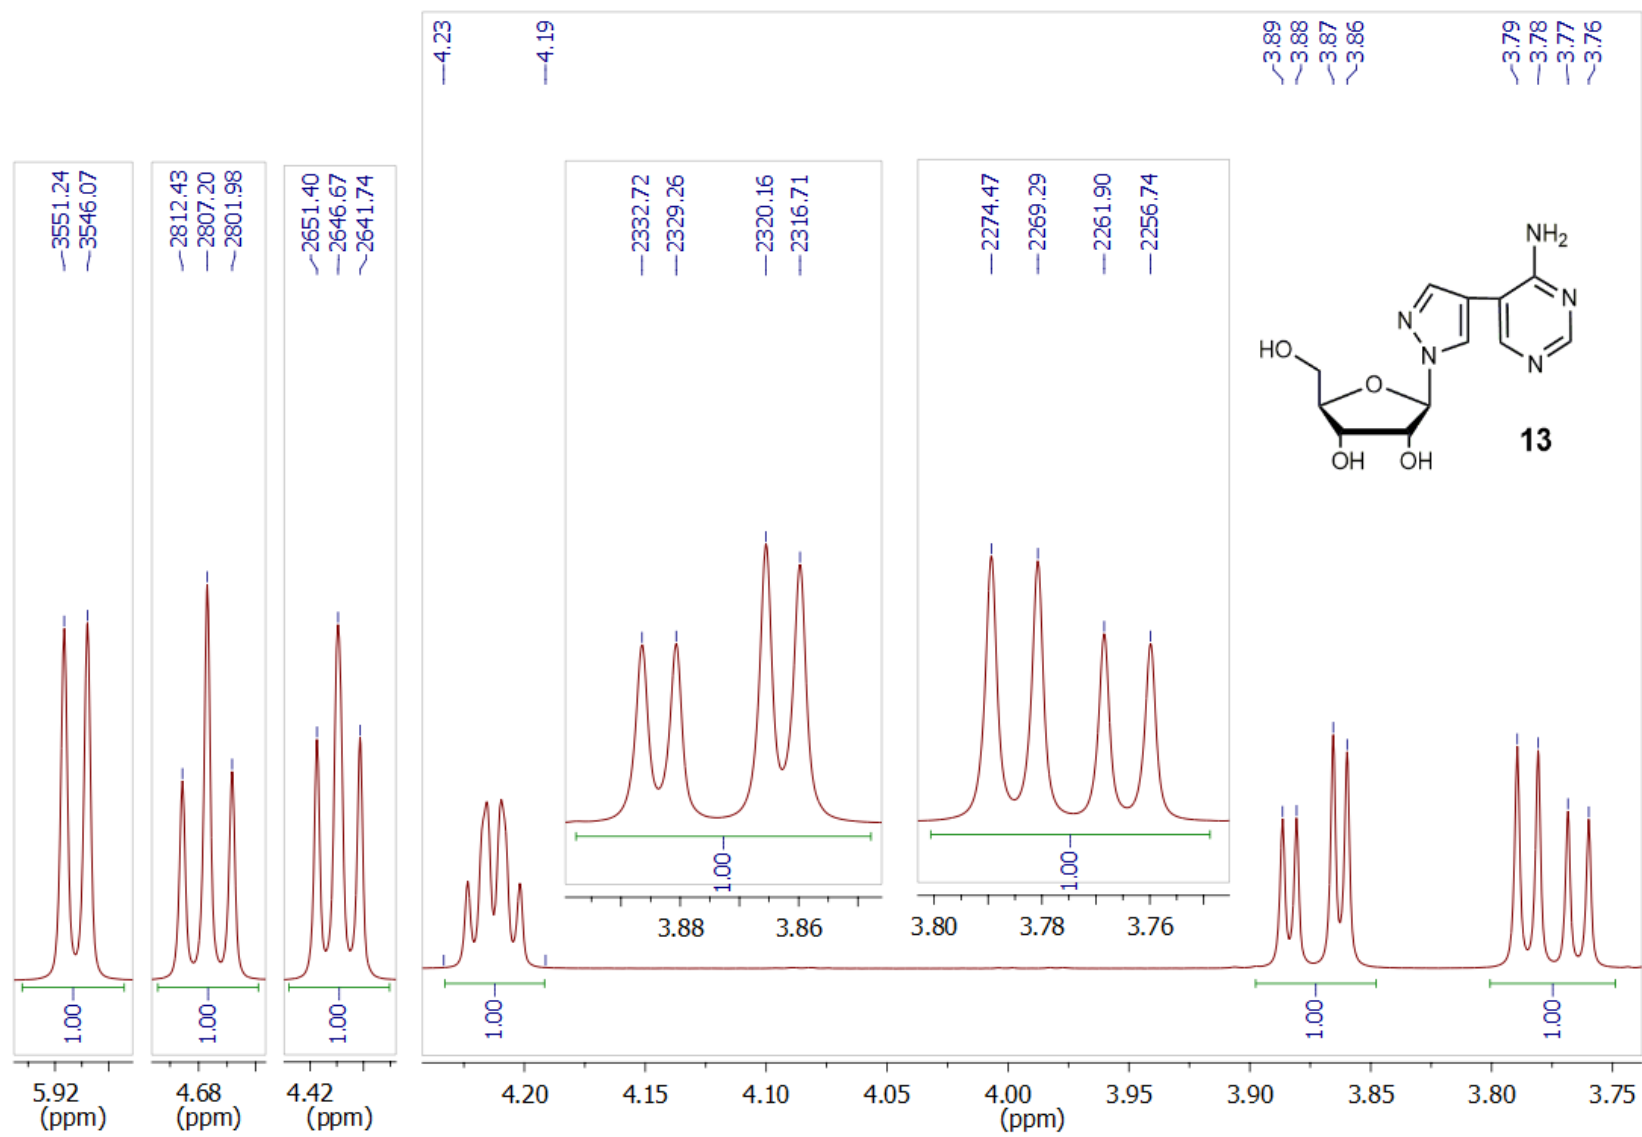

Detailed  $^1\text{H}$  NMR spectrum (600.2 MHz) of **13** in  $\text{D}_2\text{O}$

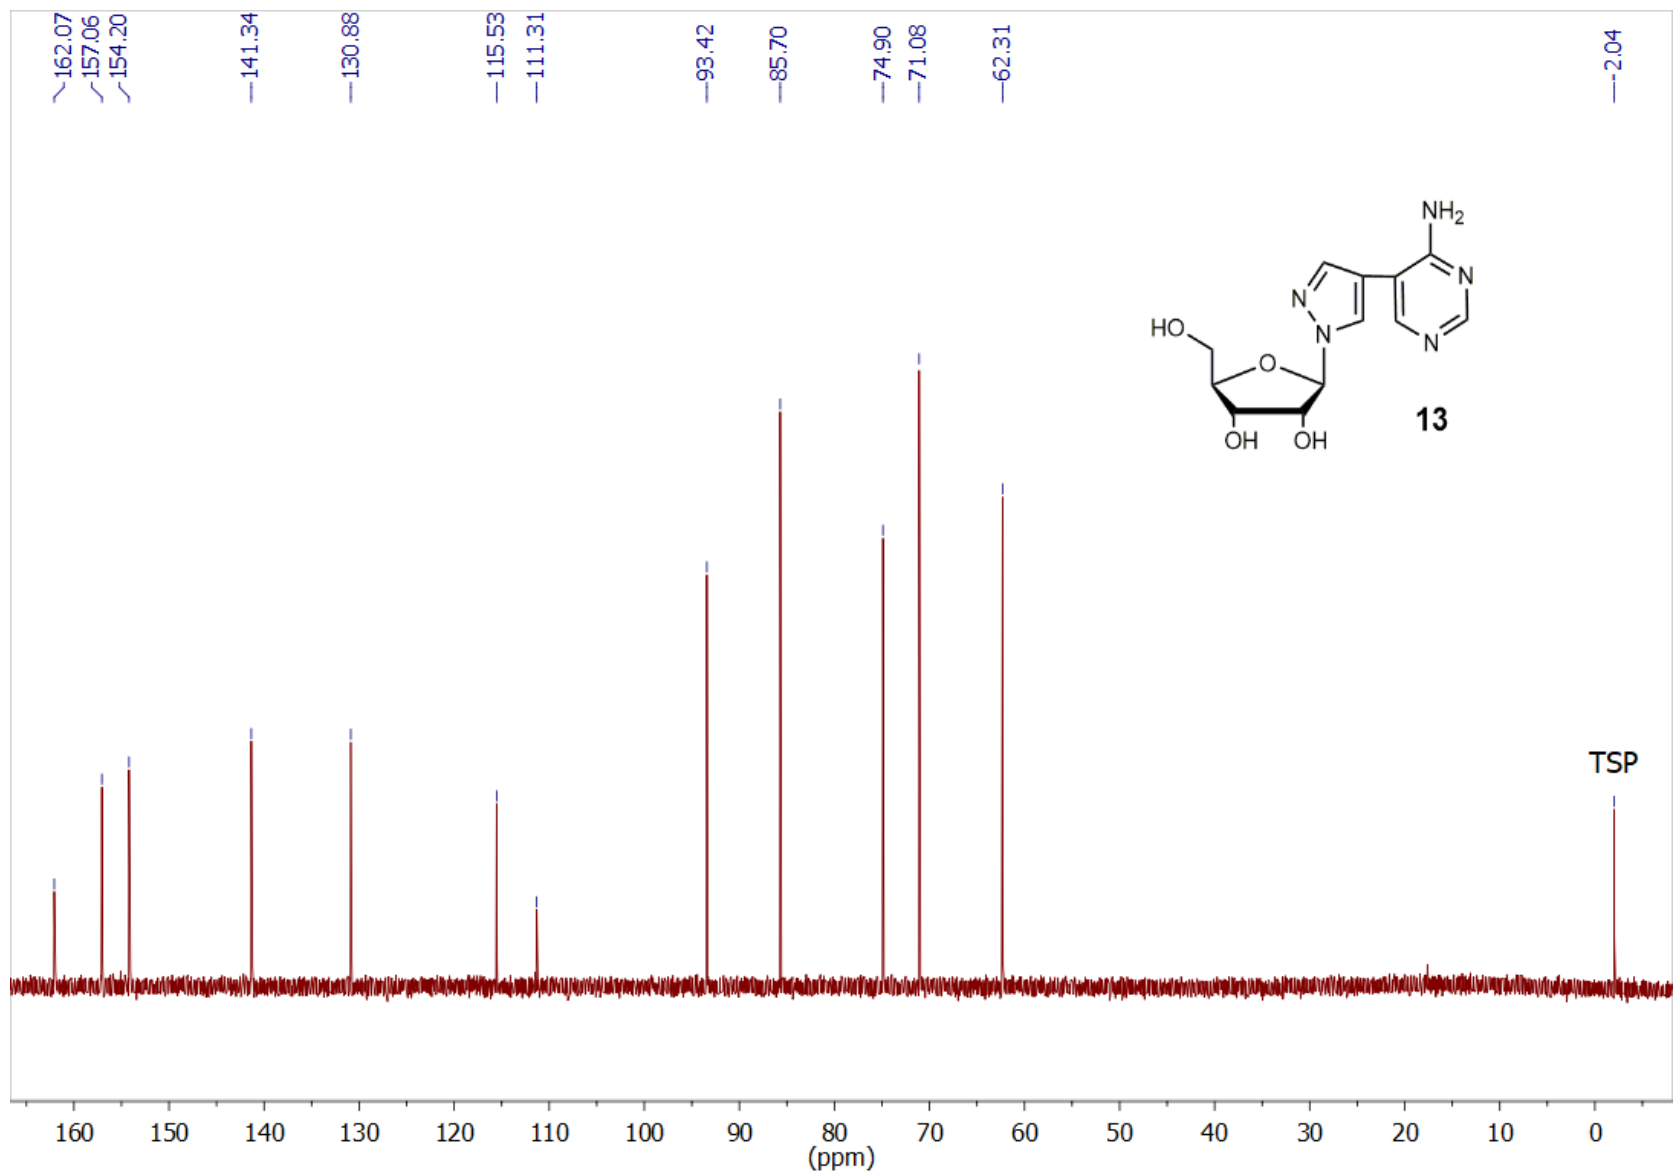

$^{13}\text{C}$  NMR spectrum (150.9 MHz) of **13** in  $\text{D}_2\text{O}$

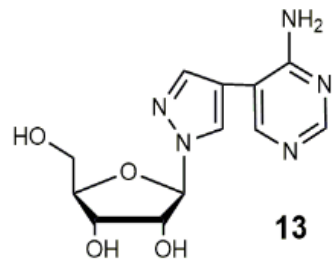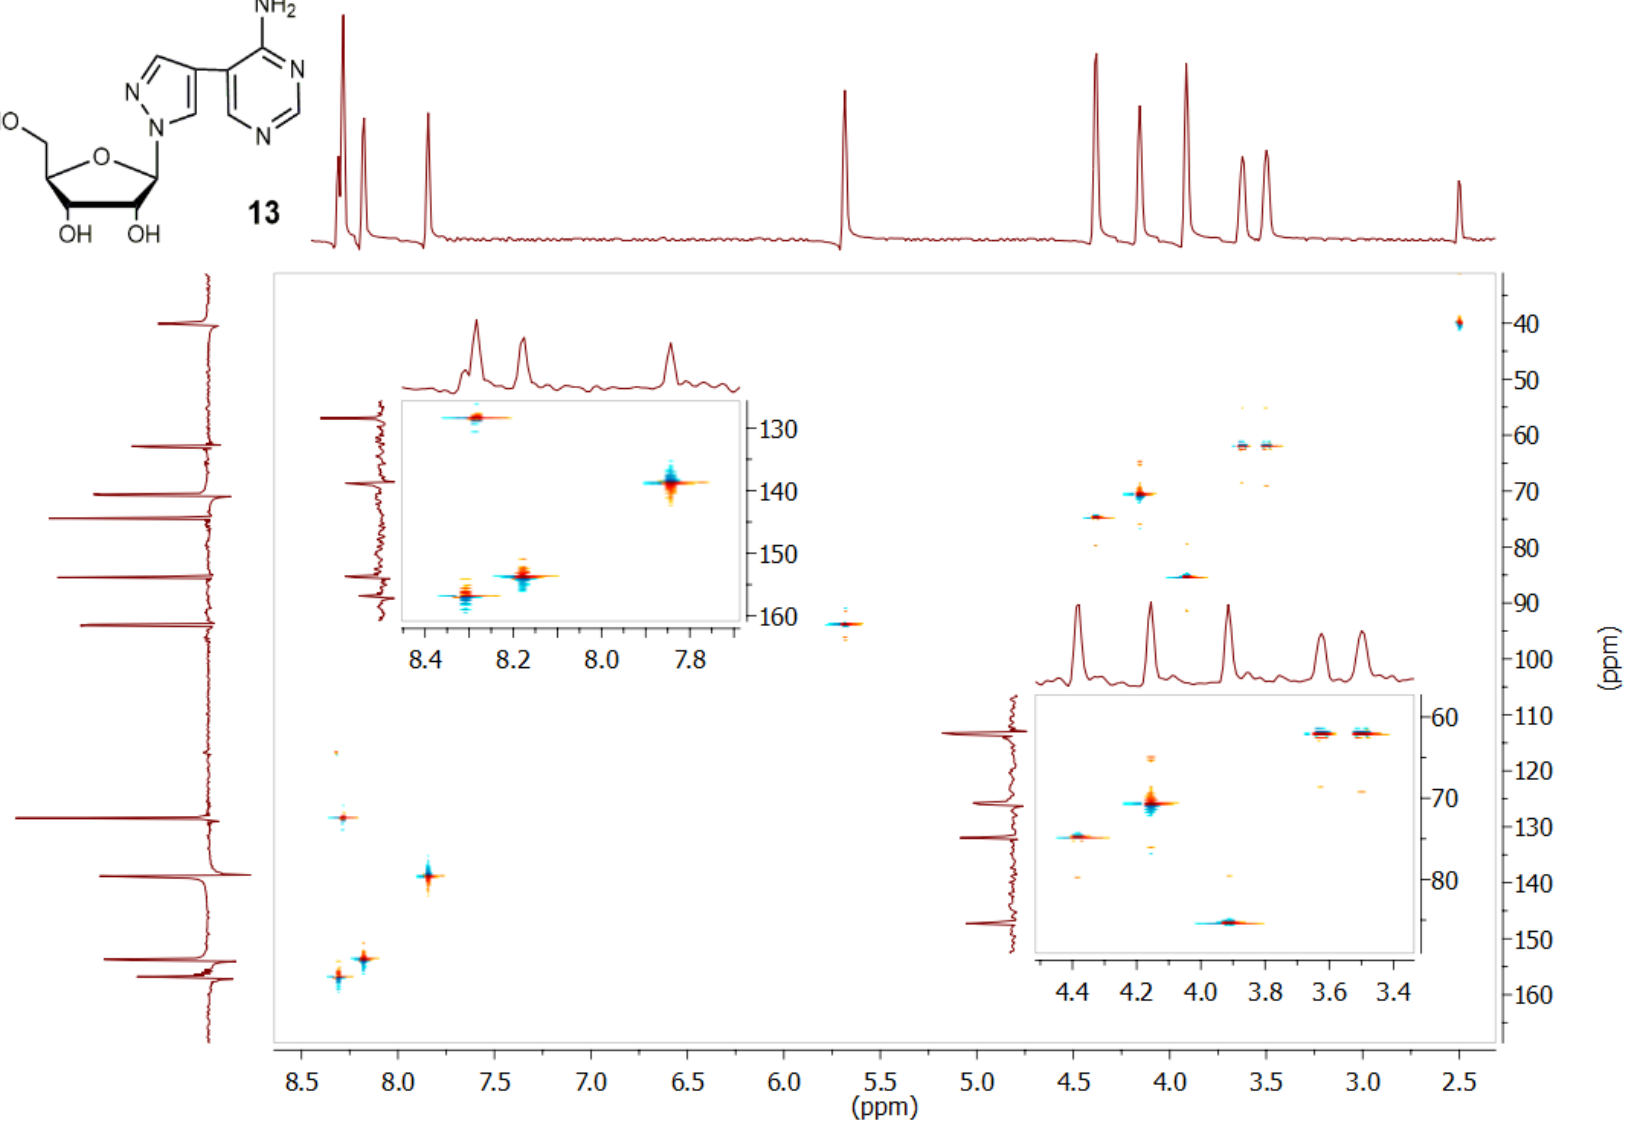

$^1\text{H}$ - $^{13}\text{C}$  HSQC spectrum (700.2 MHz) of **13** in  $\text{DMSO-}d_6$



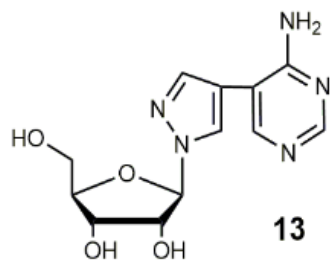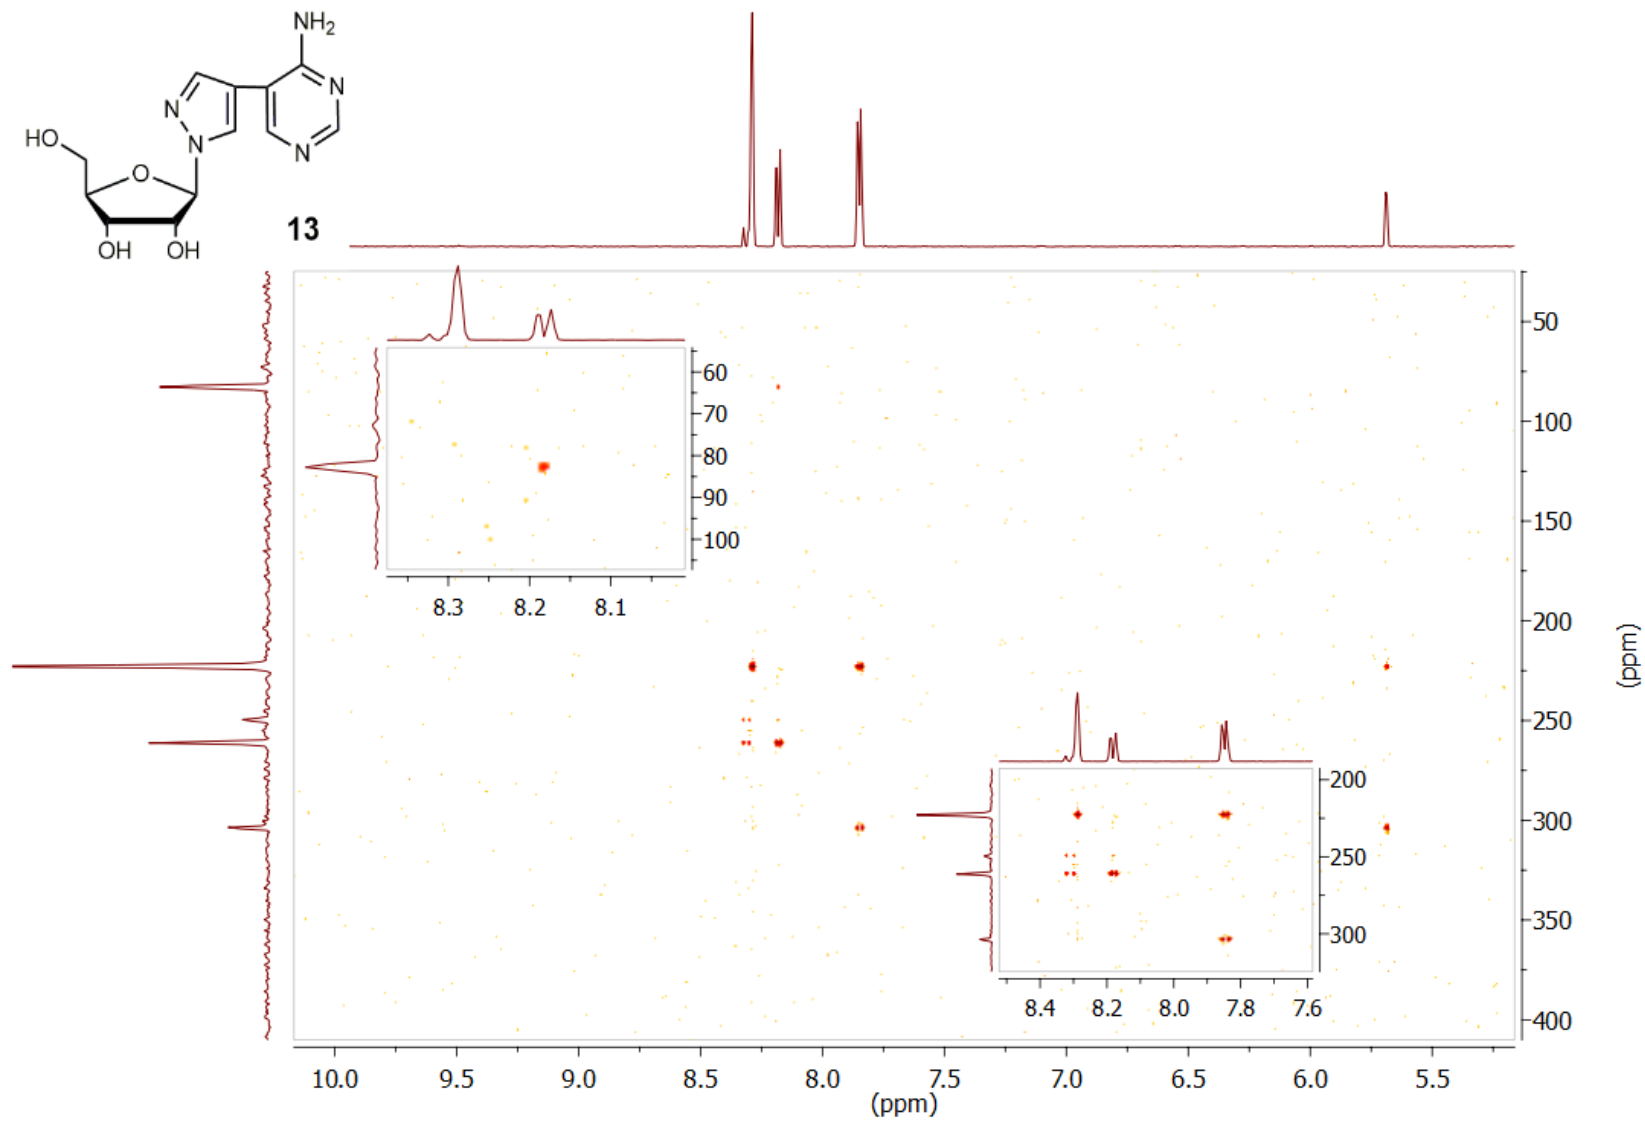

Superimposed  $^1\text{H}$ - $^{15}\text{N}$  spectra (700.2 MHz) of **13** in  $\text{DMSO-}d_6$

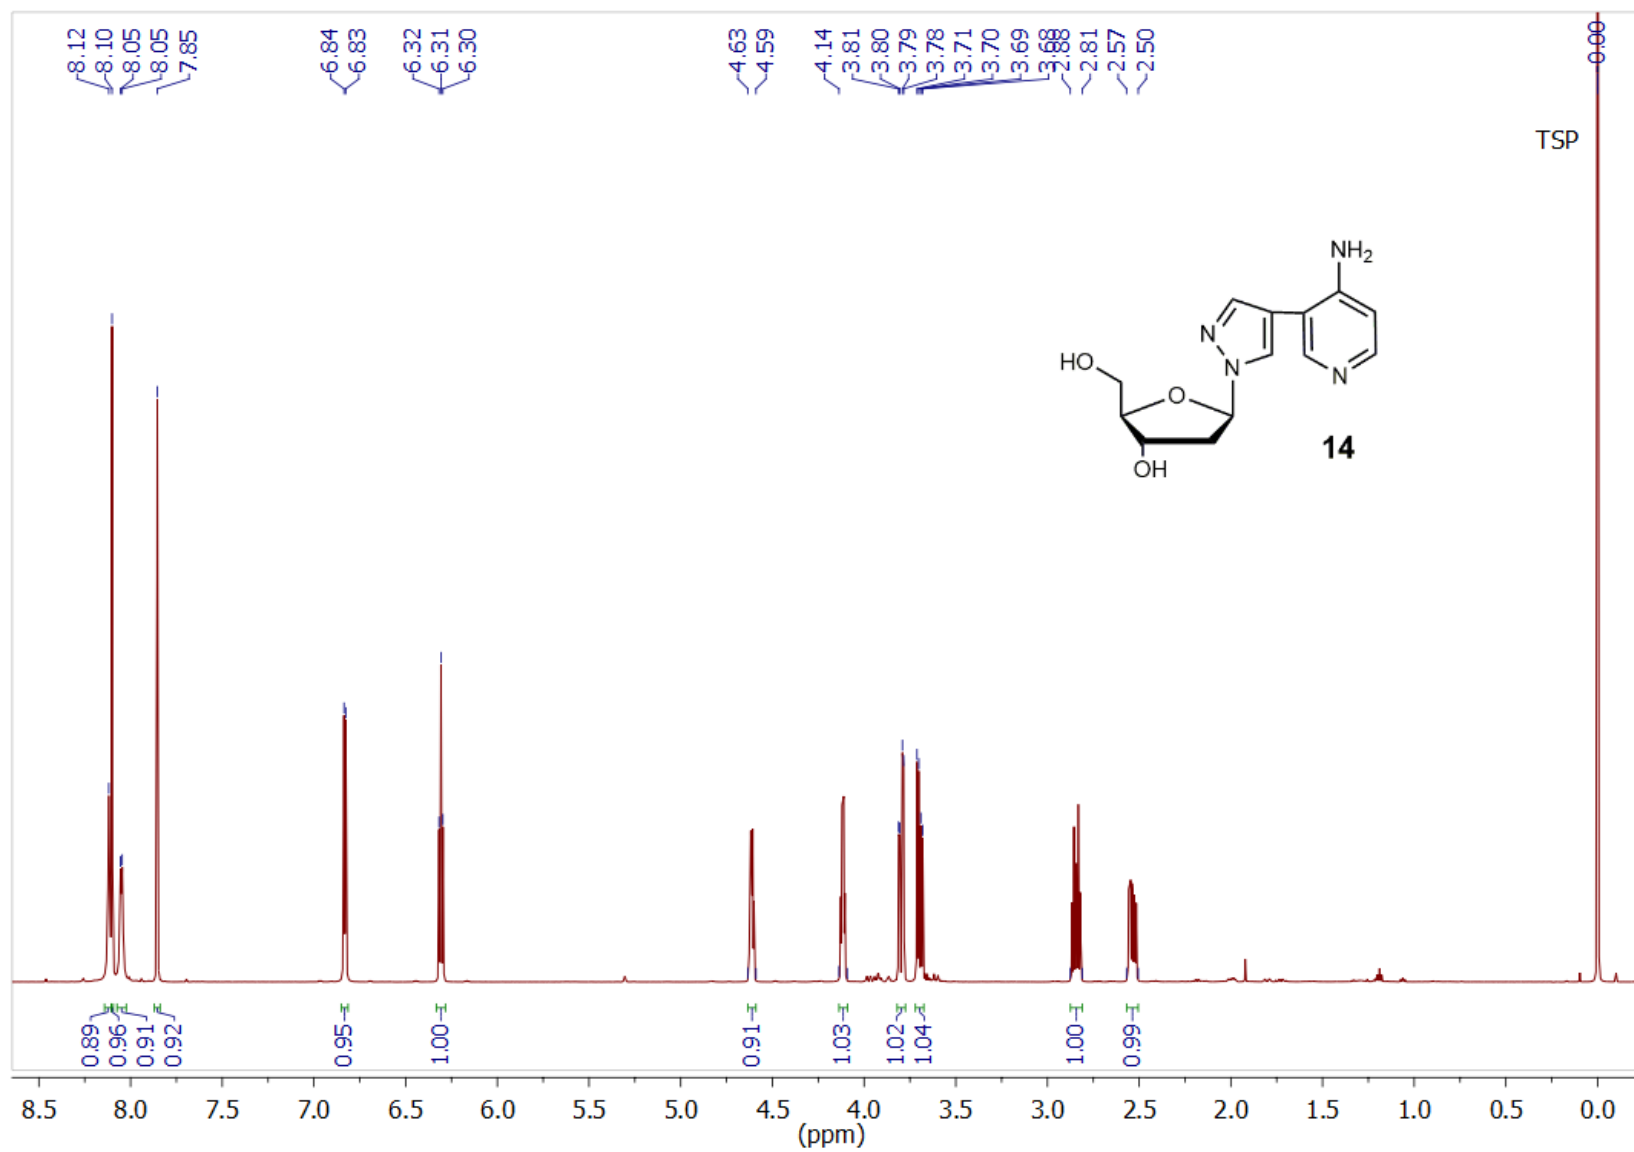

$^1\text{H}$  NMR spectrum (600.2 MHz) of **14** in  $\text{D}_2\text{O}$

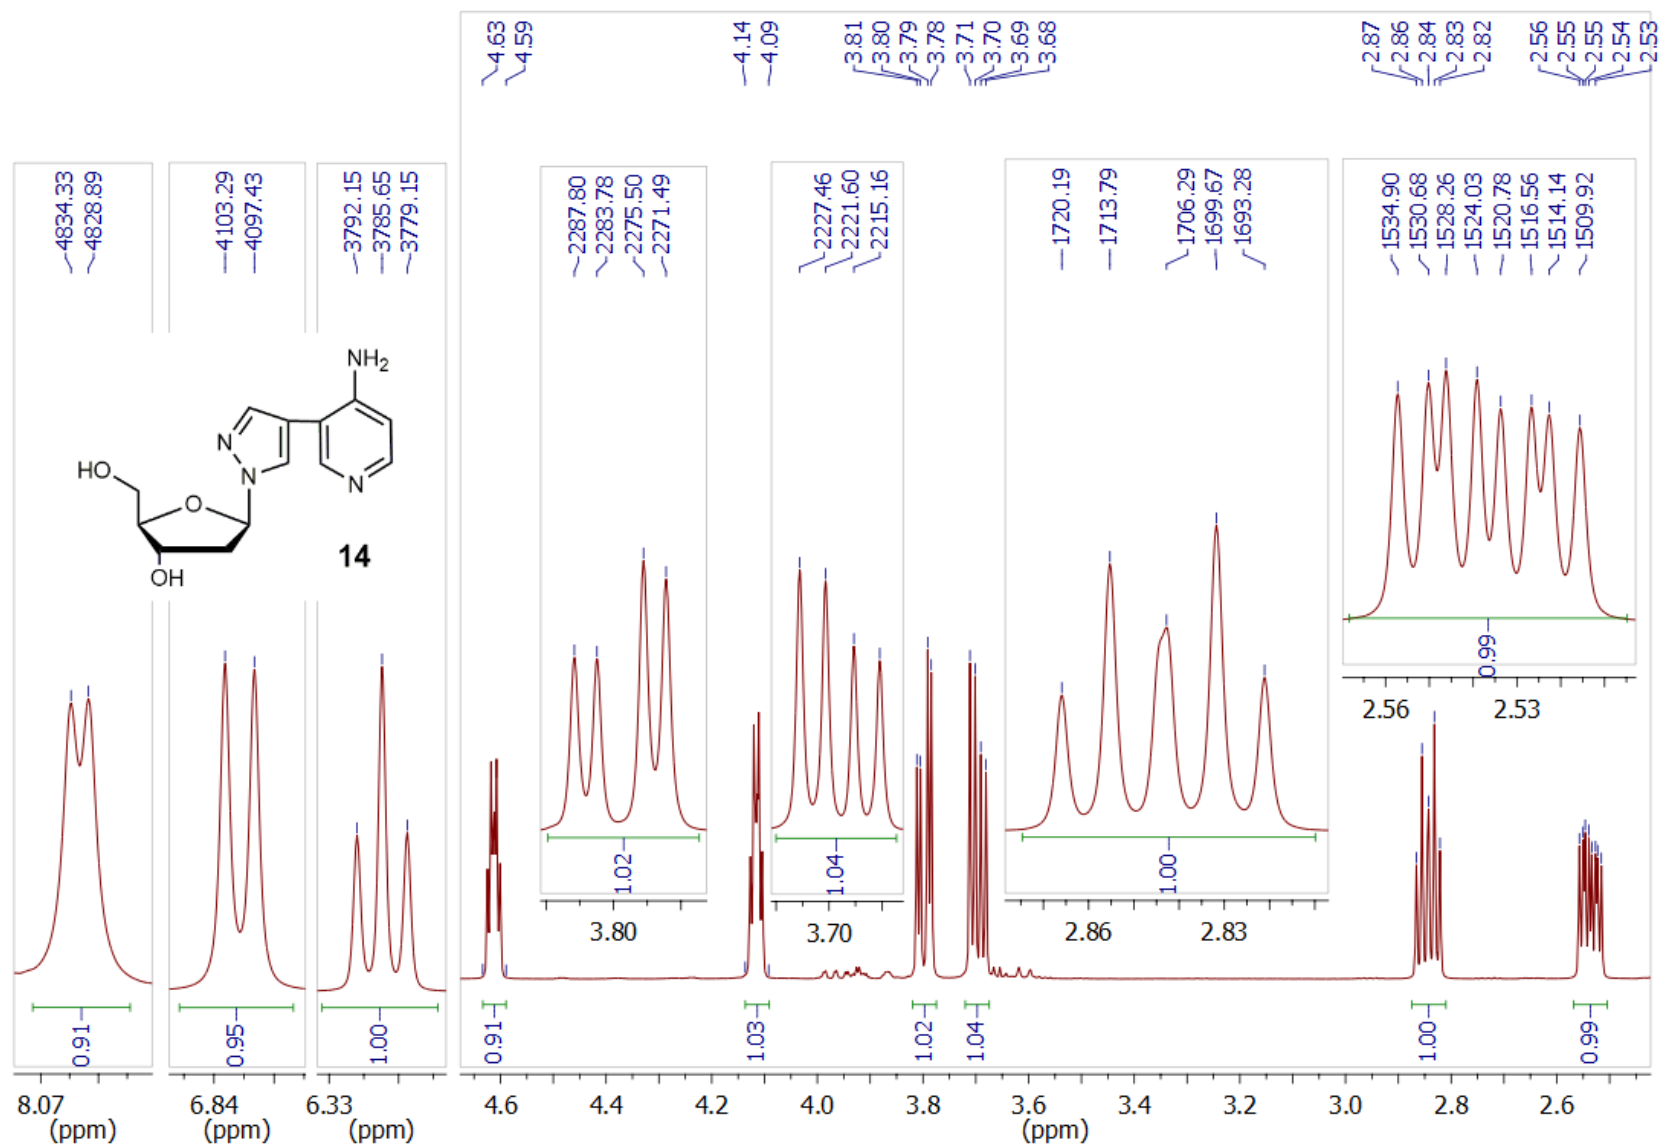

Detailed  $^1\text{H}$  NMR spectrum (600.2 MHz) of **14** in  $\text{D}_2\text{O}$

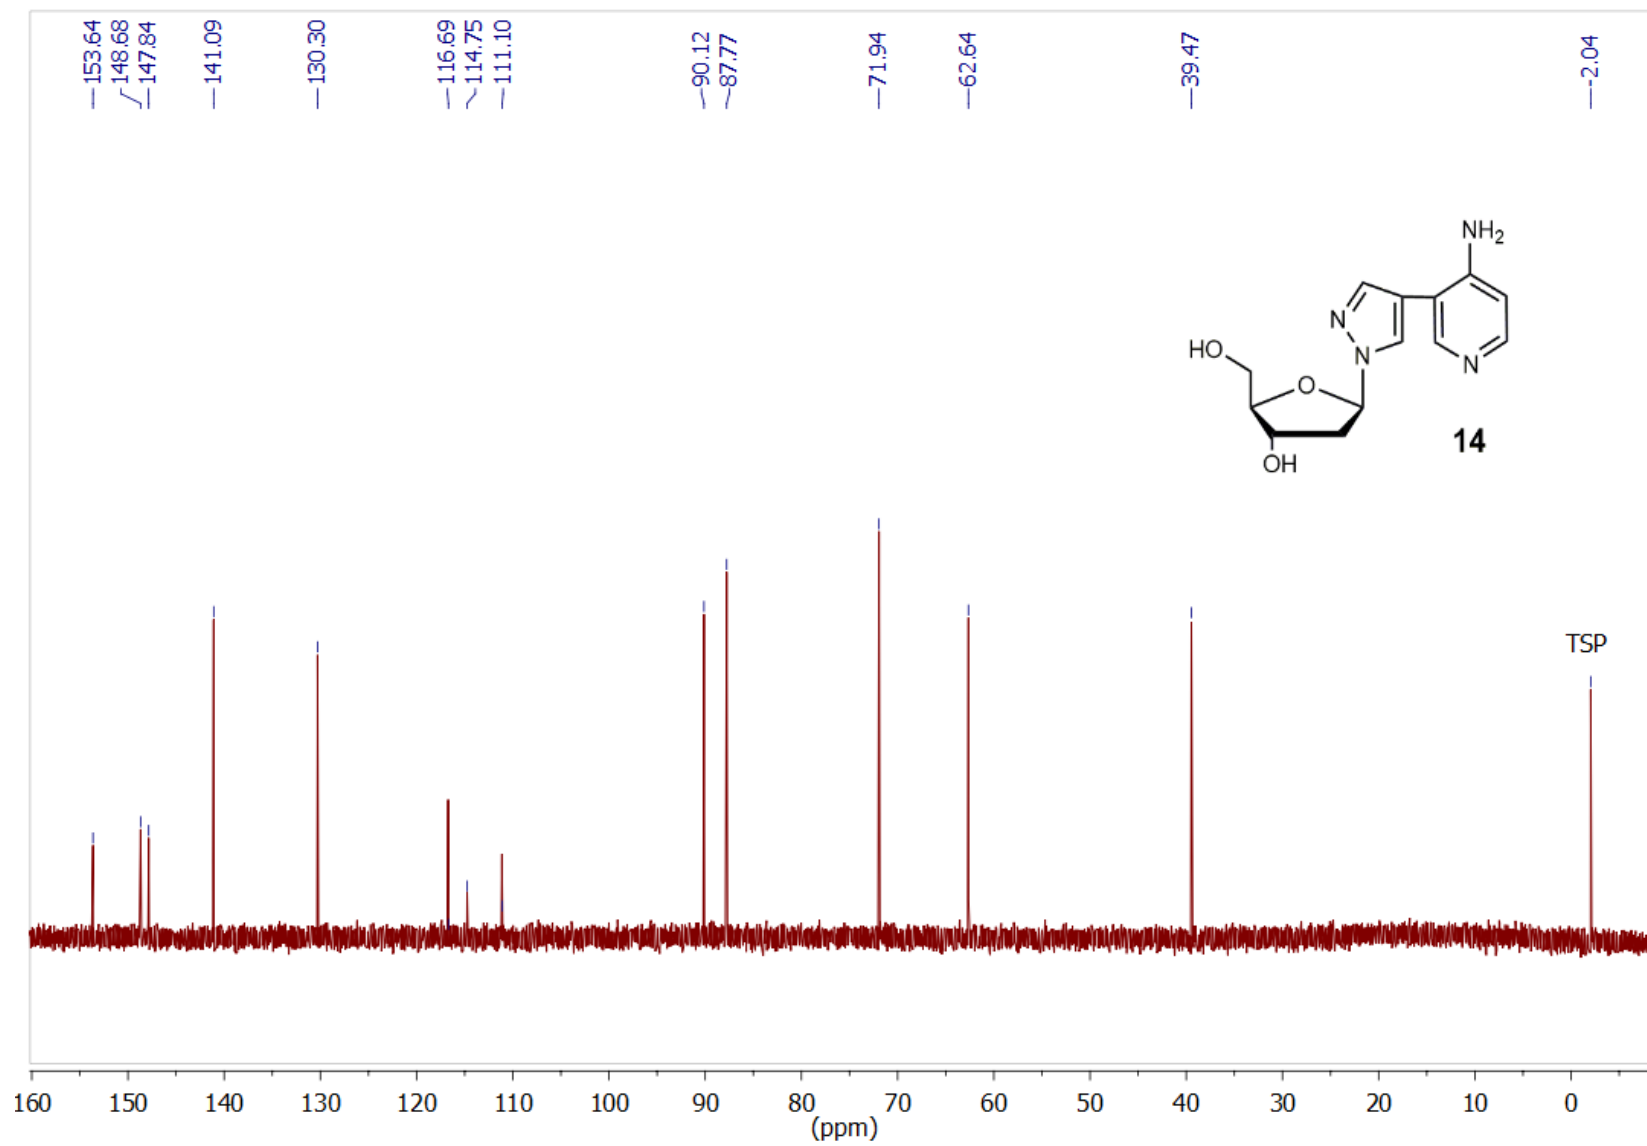

$^{13}\text{C}$  NMR spectrum (150.9 MHz) of **14** in  $\text{D}_2\text{O}$

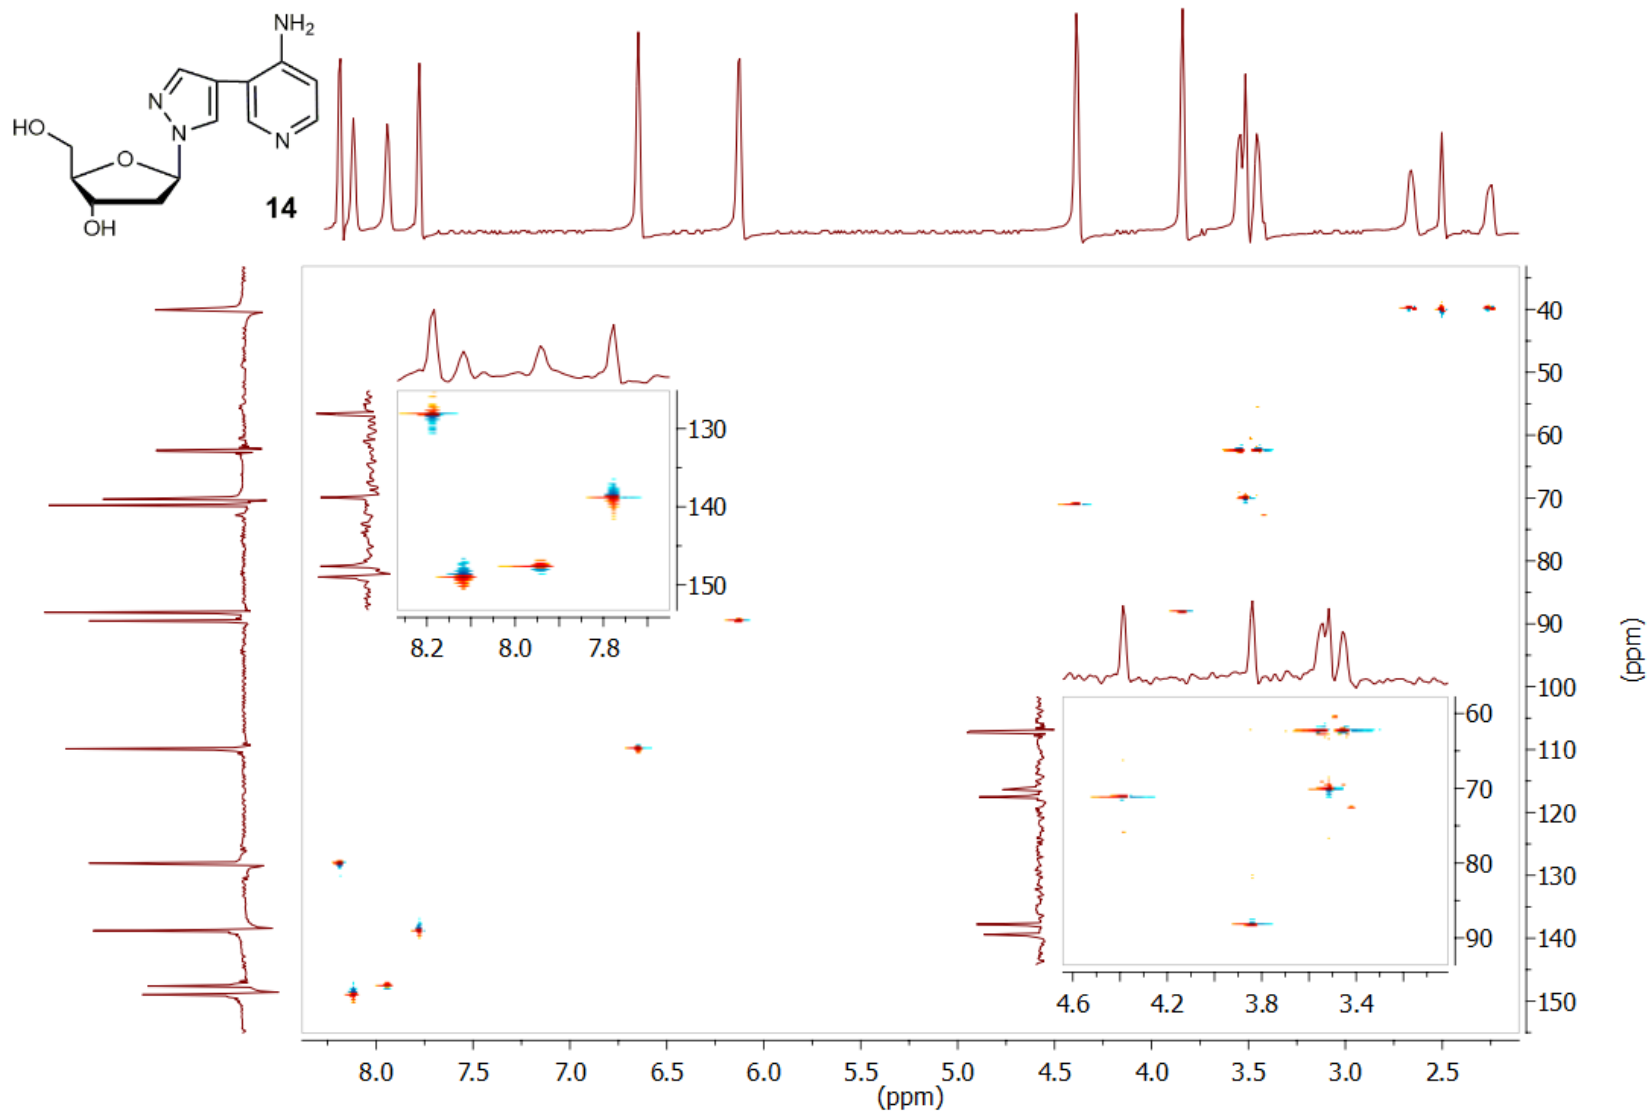

$^1\text{H}$ - $^{13}\text{C}$  HSQC spectrum (700.2 MHz) of **14** in  $\text{DMSO-}d_6$

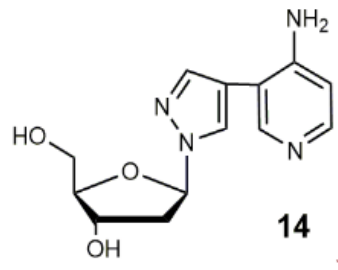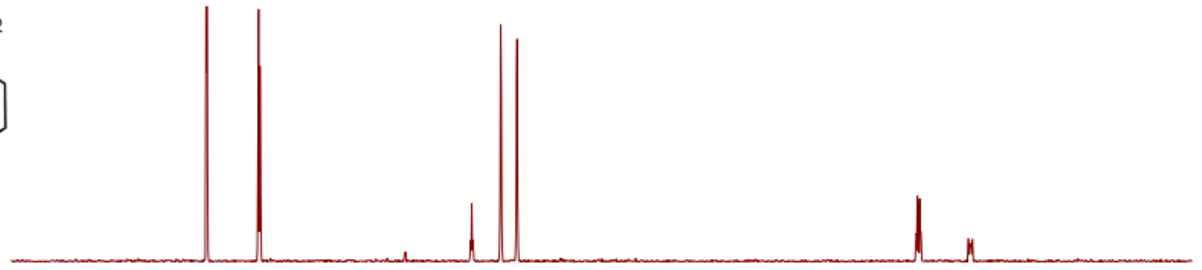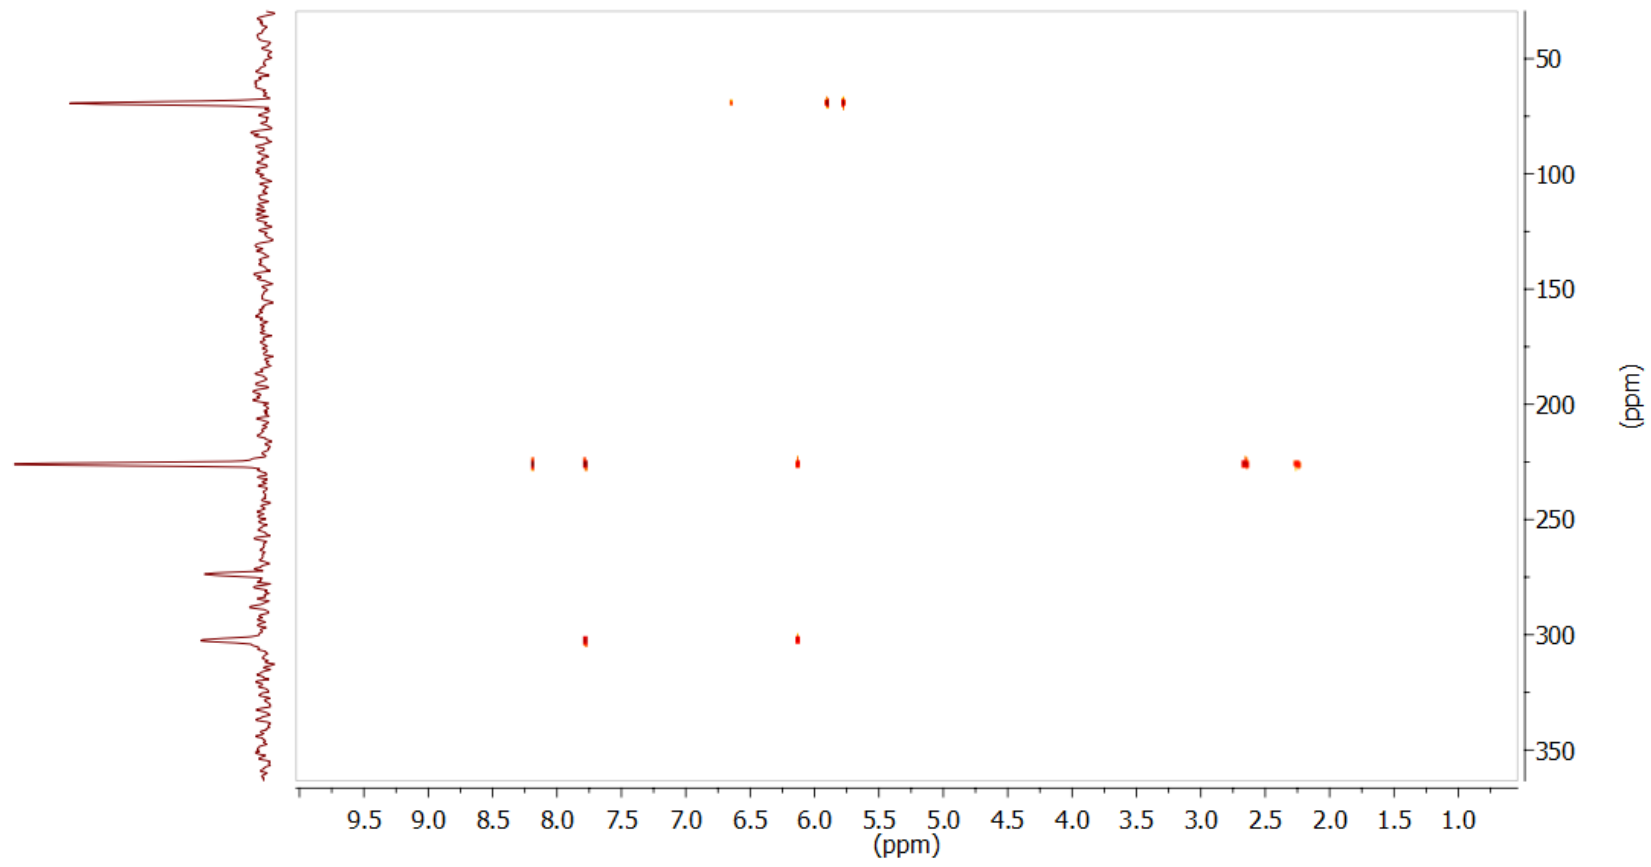

Superimposed  $^1\text{H}$ - $^{15}\text{N}$  spectra (700.2 MHz) of **14** in DMSO- $d_6$

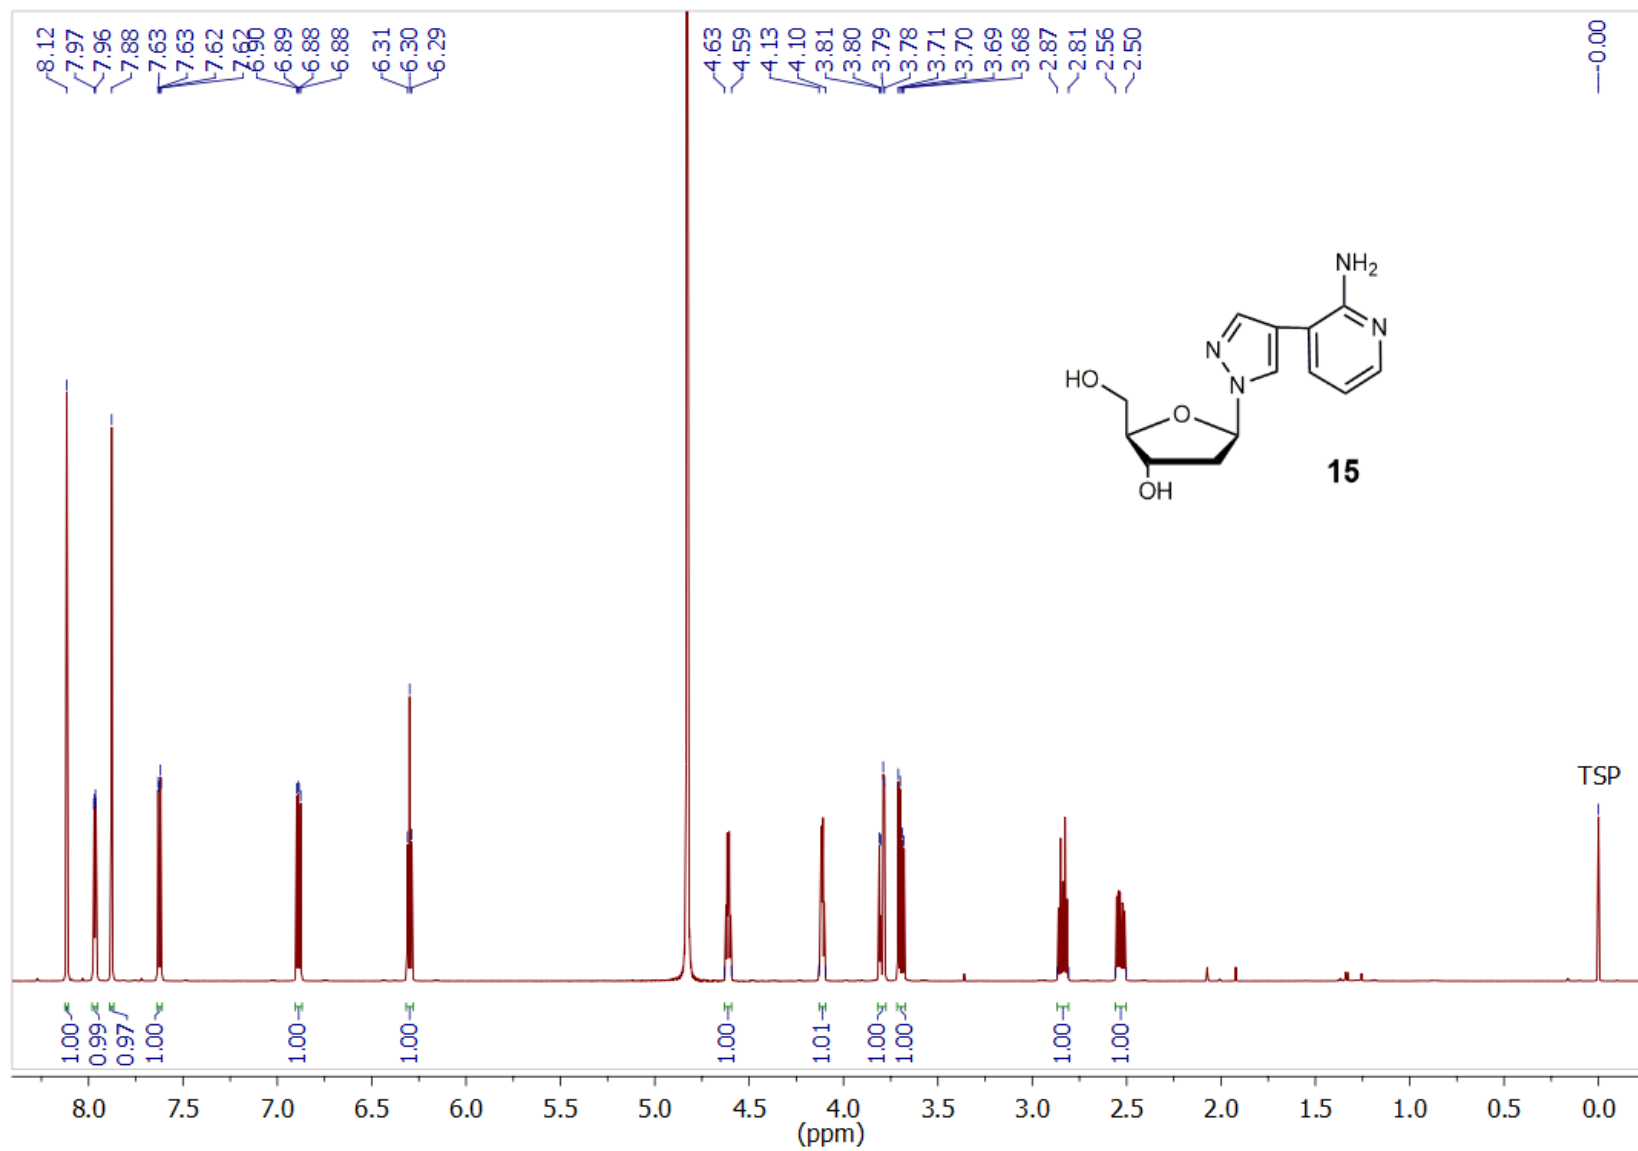

<sup>1</sup>H NMR spectrum (600.2 MHz) of **15** in D<sub>2</sub>O

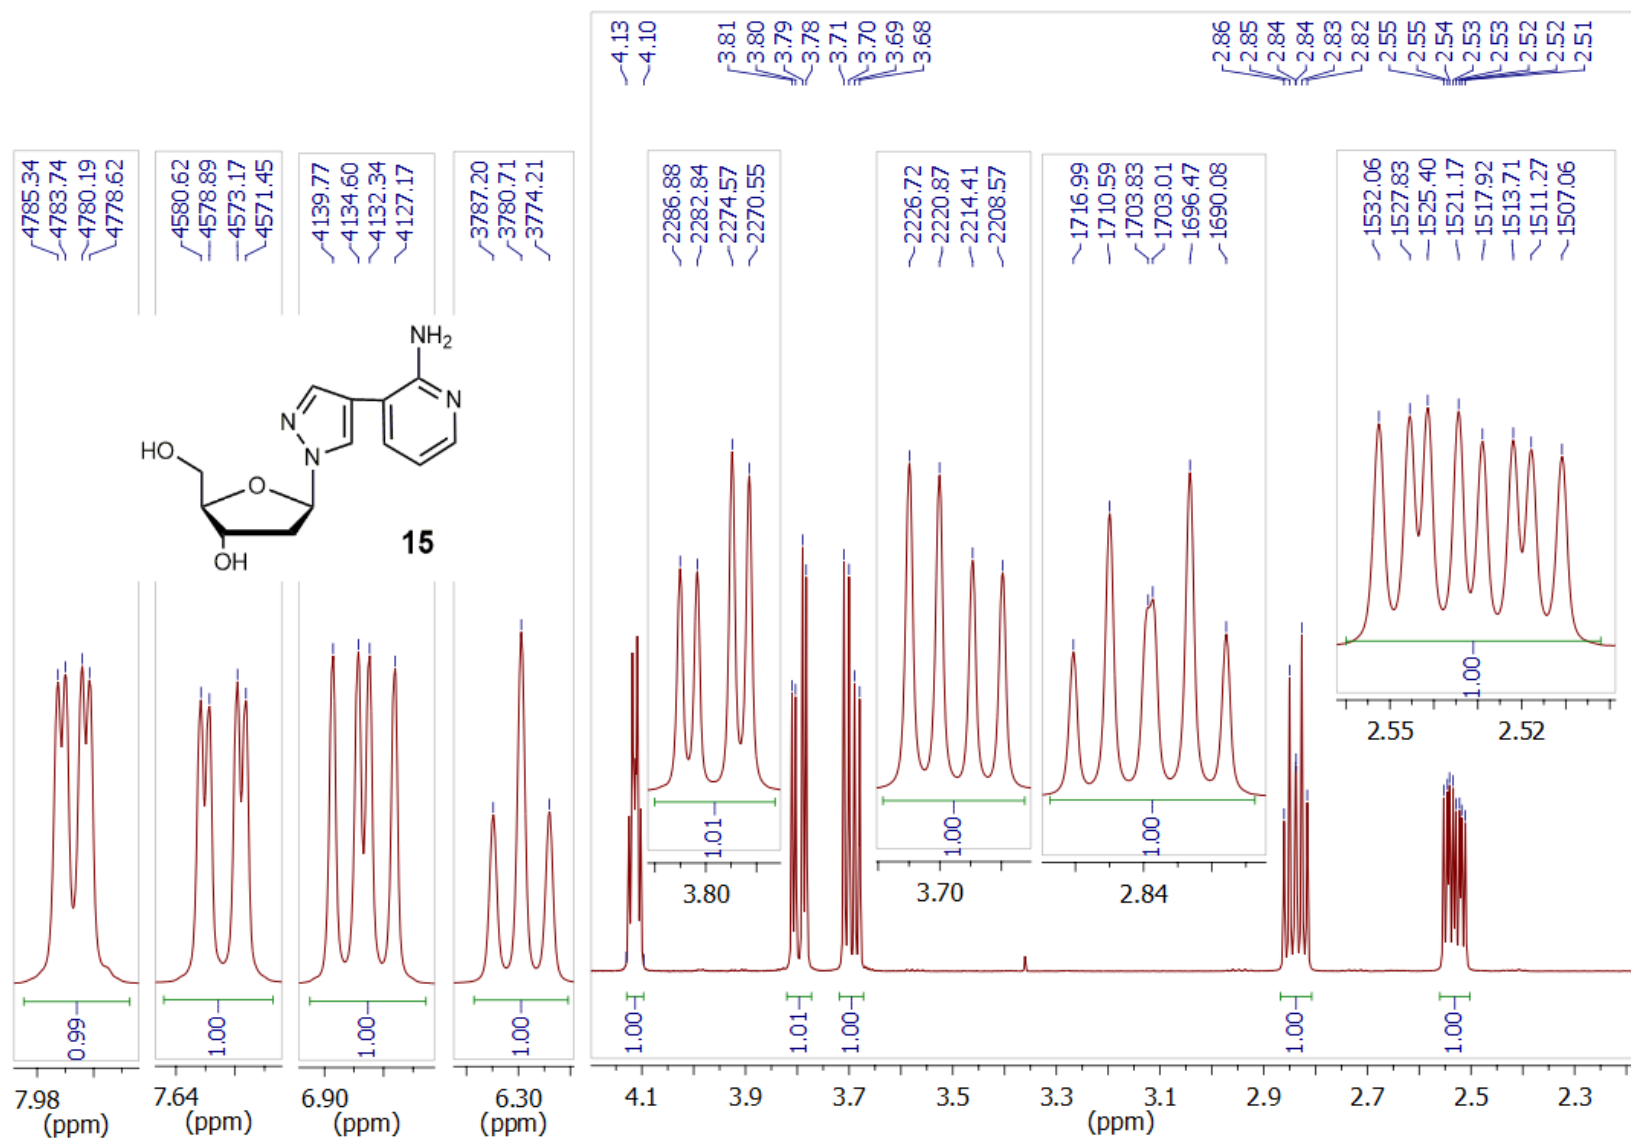

Detailed  $^1\text{H}$  NMR spectrum (600.2 MHz) of **15** in  $\text{D}_2\text{O}$



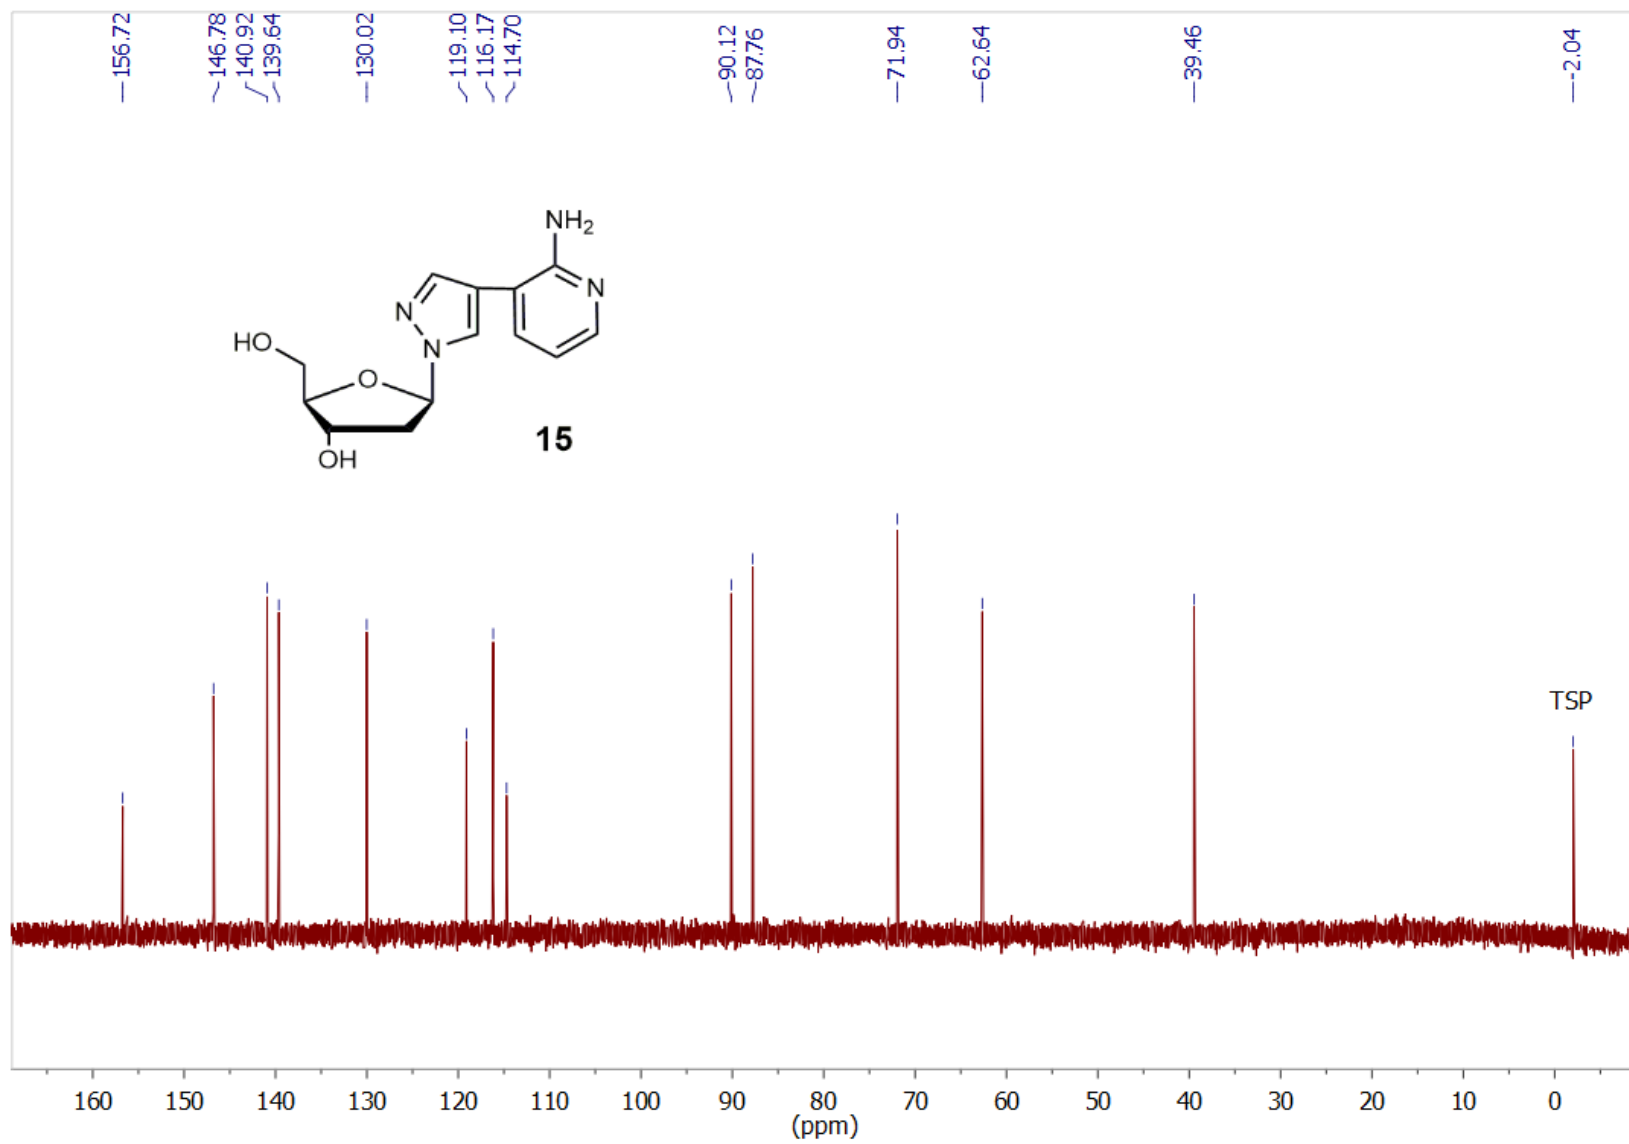

$^{13}\text{C}$  NMR spectrum (150.9 MHz) of **15** in  $\text{D}_2\text{O}$

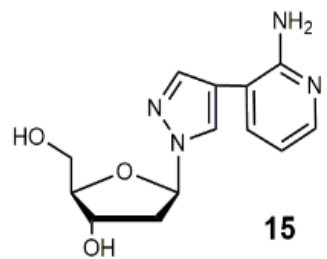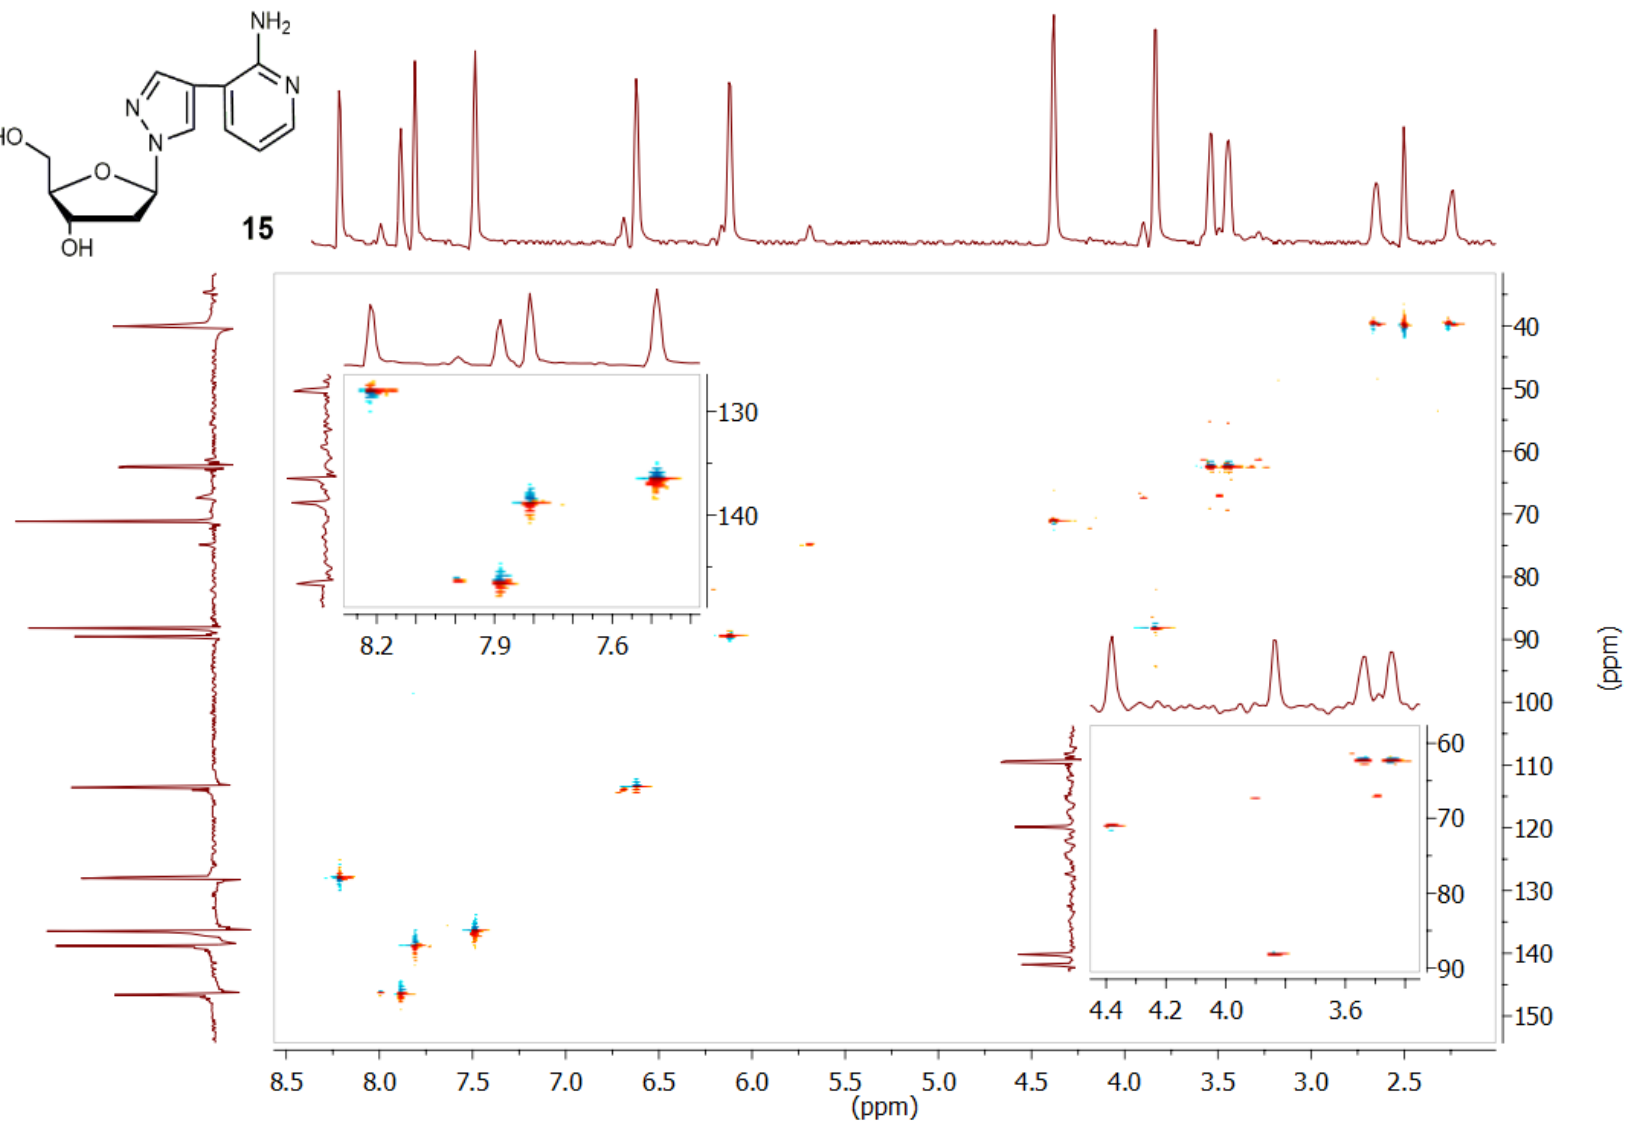

$^1\text{H}$ - $^{13}\text{C}$  HSQC spectrum (700.2 MHz) of **15** in DMSO- $d_6$

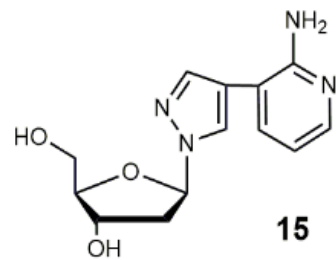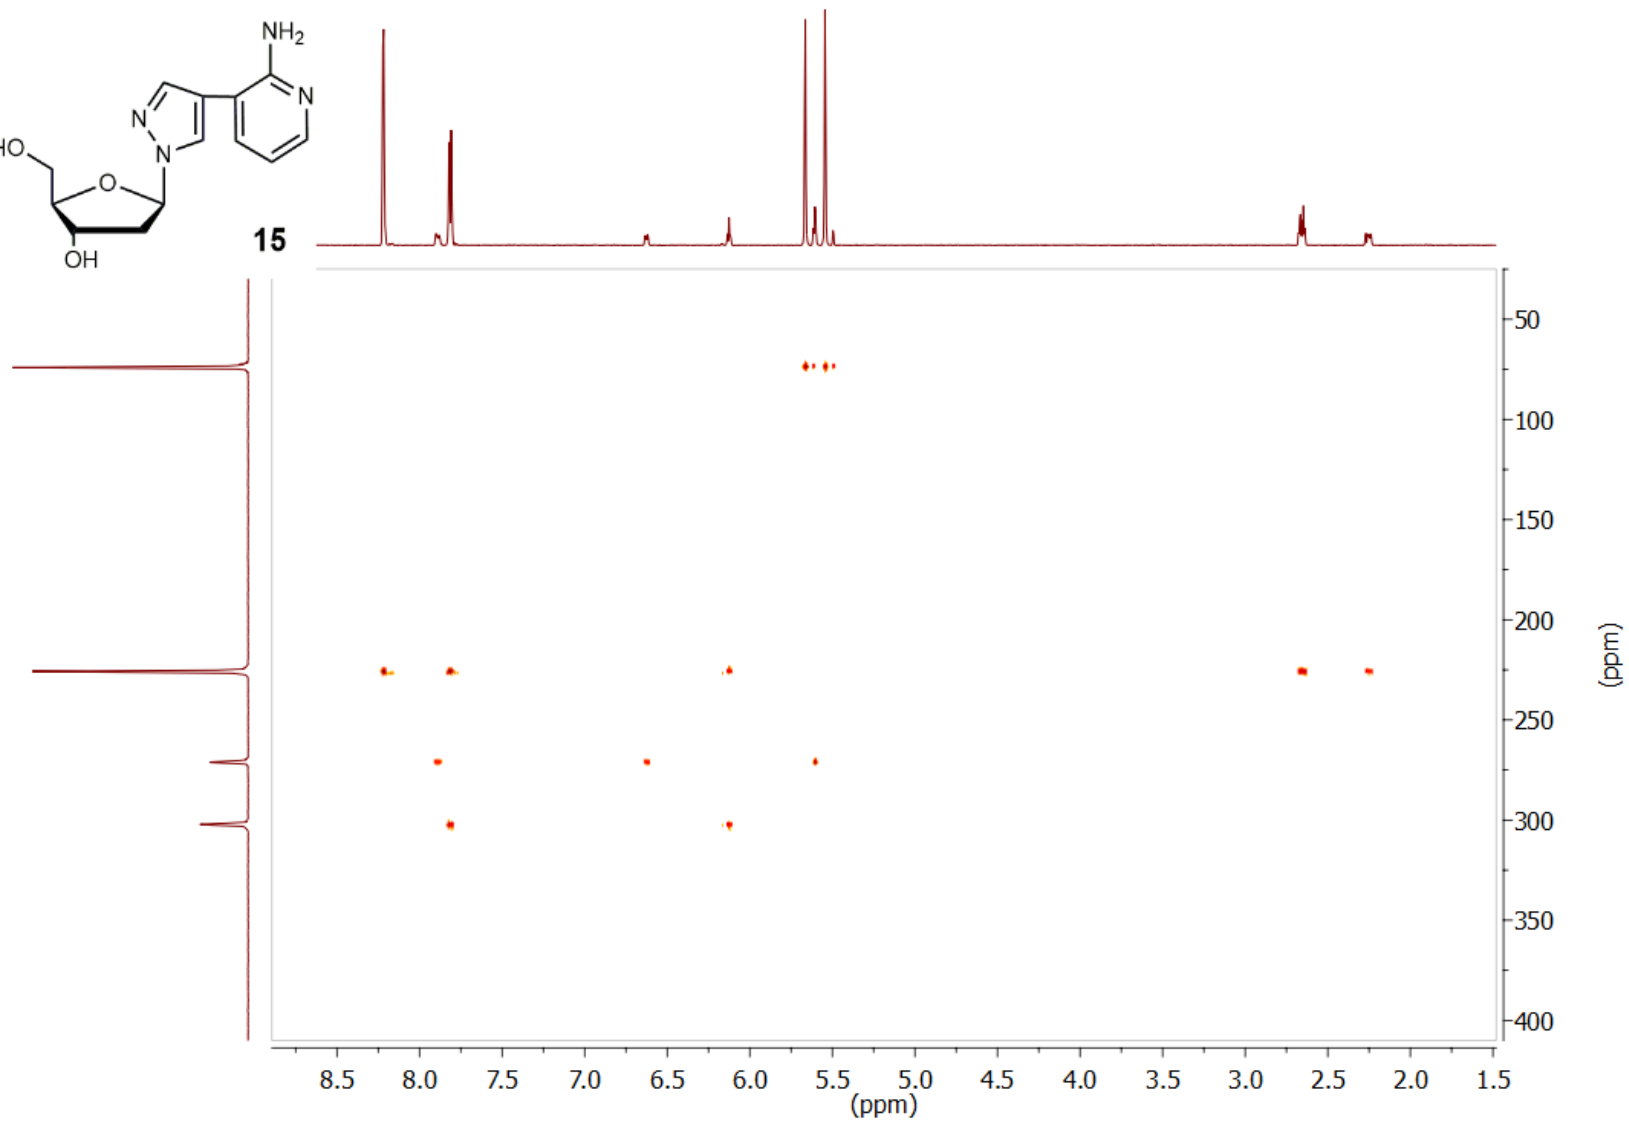

Superimposed  $^1\text{H}$ - $^{15}\text{N}$  spectra (700.2 MHz) of **15** in  $\text{DMSO-}d_6$

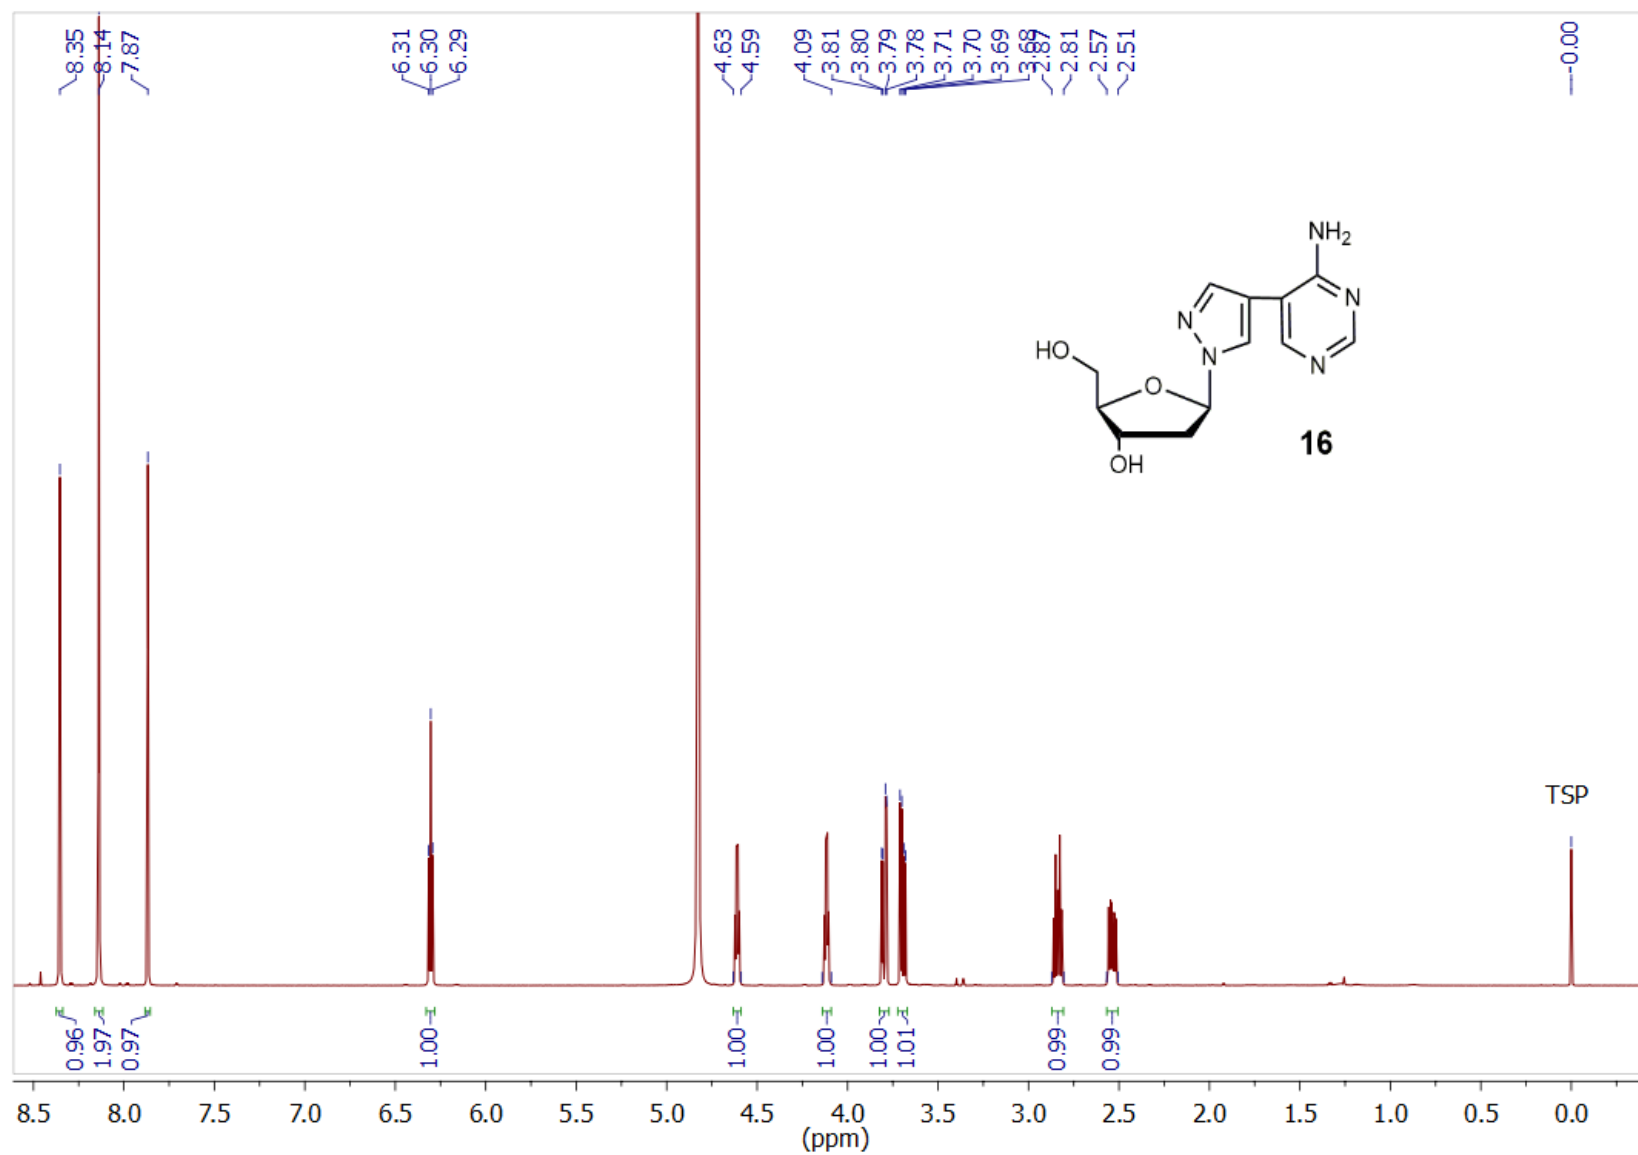

$^1\text{H}$  NMR spectrum (600.2 MHz) of **16** in  $\text{D}_2\text{O}$

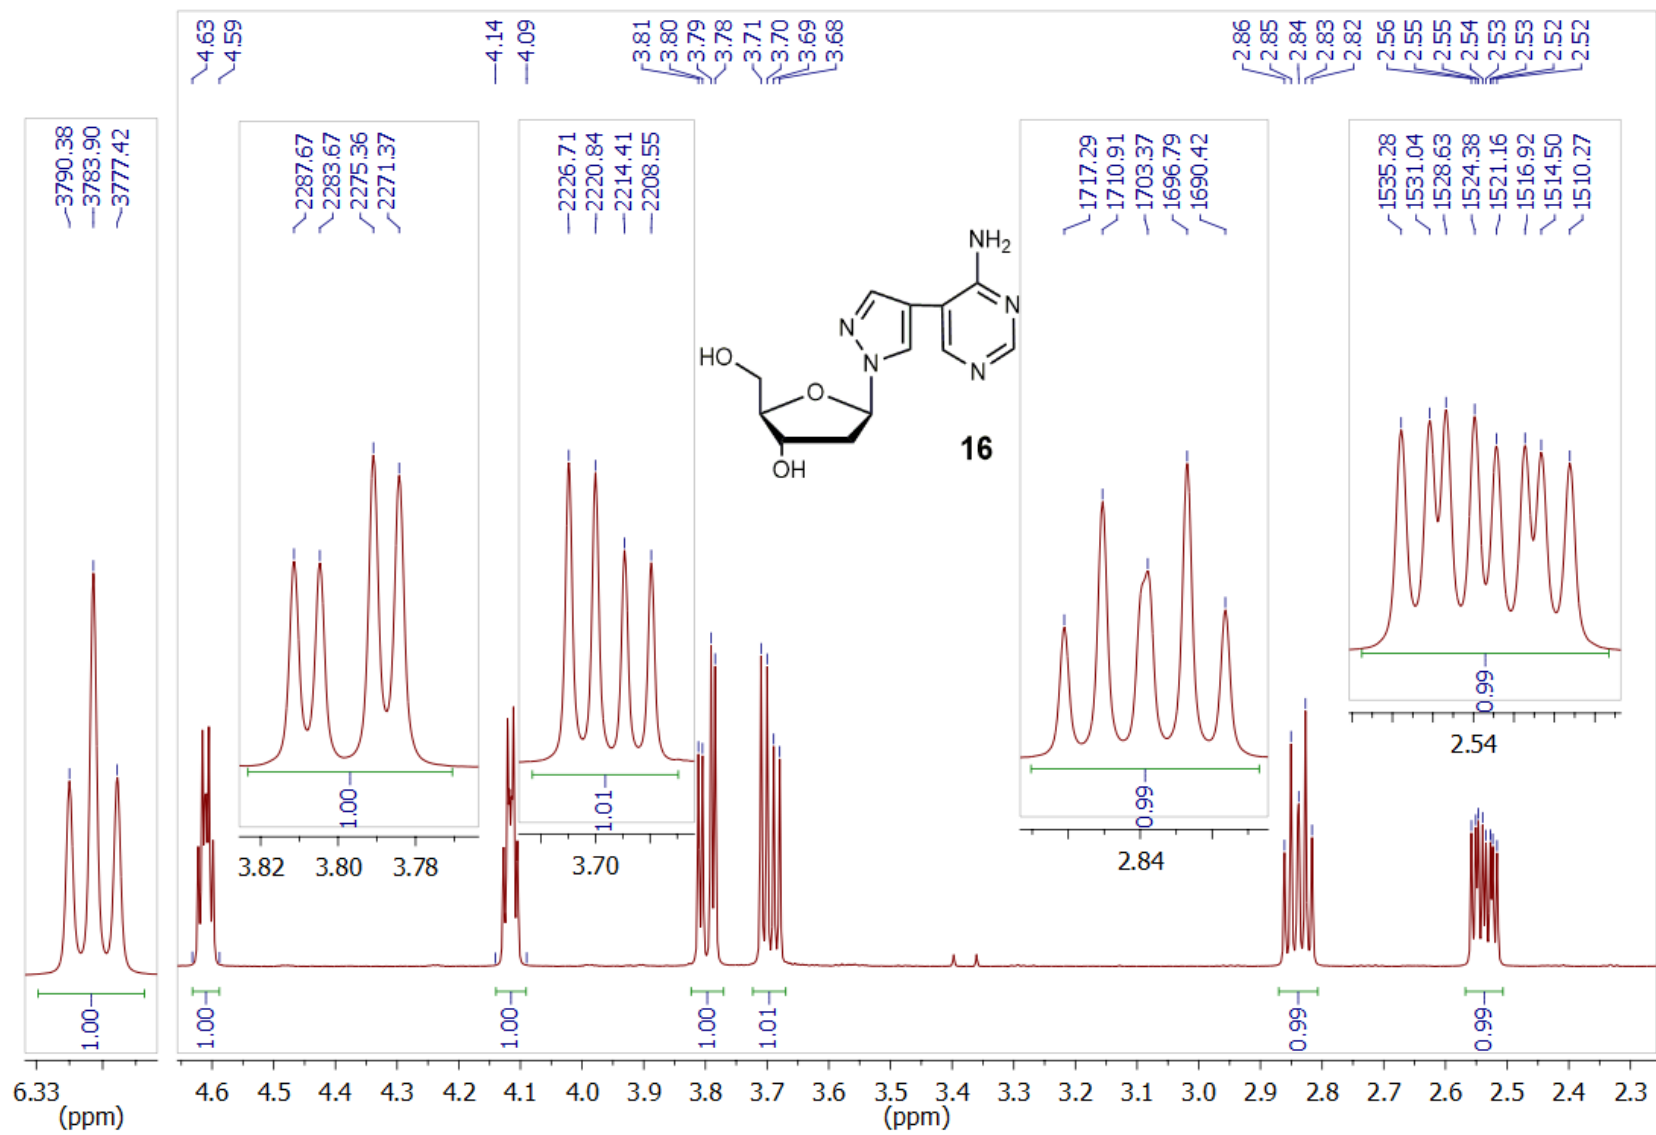

Detailed  $^1\text{H}$  NMR spectrum (600.2 MHz) of **16** in  $\text{D}_2\text{O}$

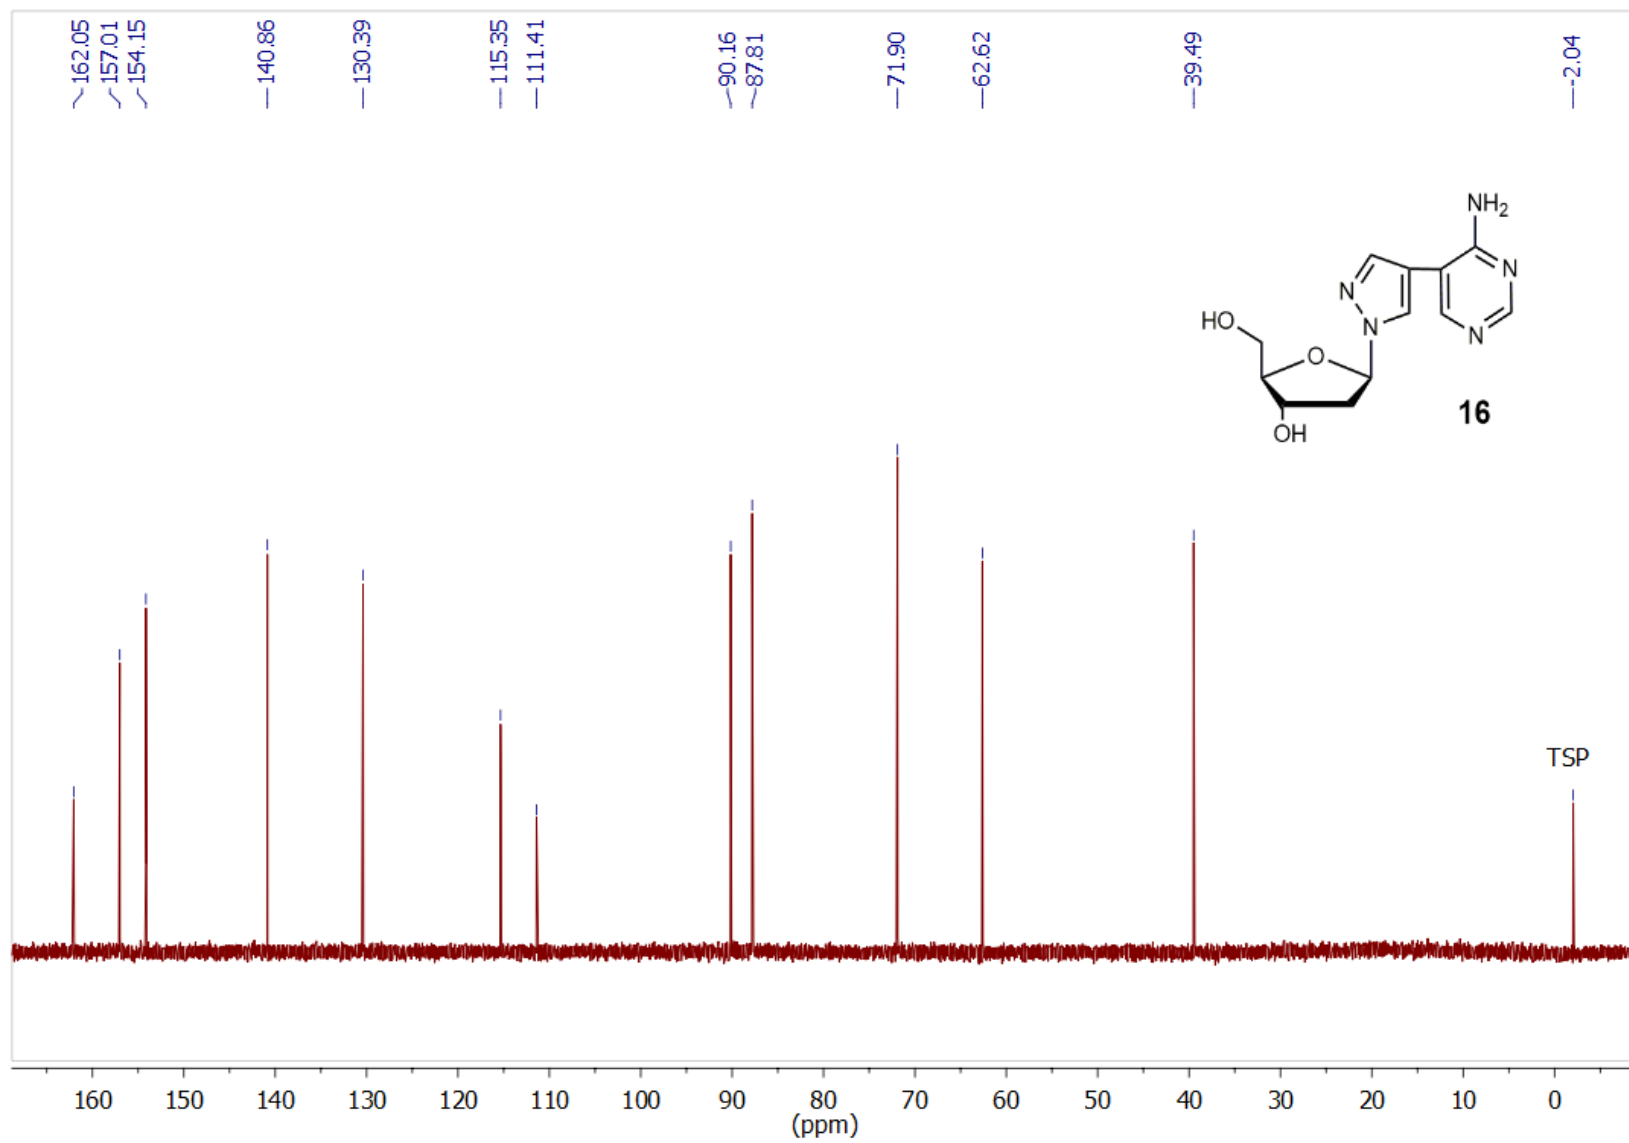

<sup>13</sup>C NMR spectrum (150.9 MHz) of **16** in D<sub>2</sub>O

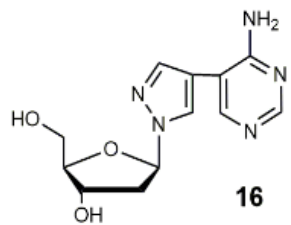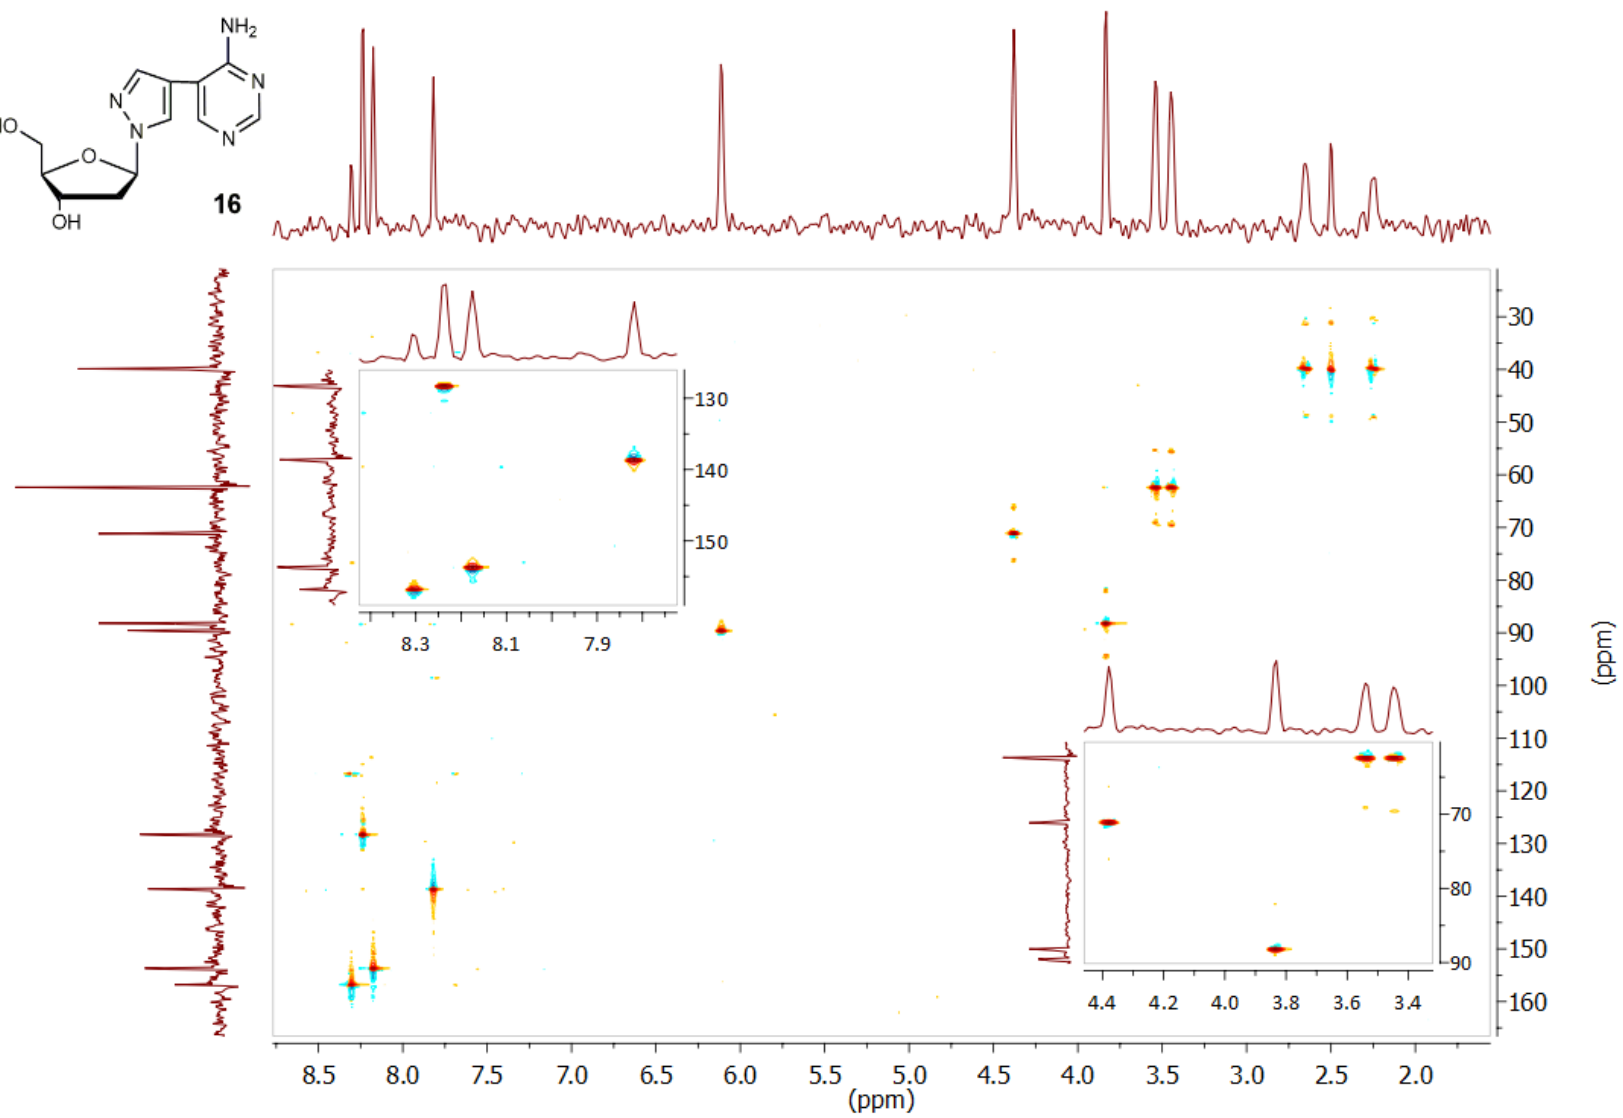

$^1\text{H}$ - $^{13}\text{C}$  HSQC spectrum (700.2 MHz) of **16** in  $\text{DMSO-}d_6$

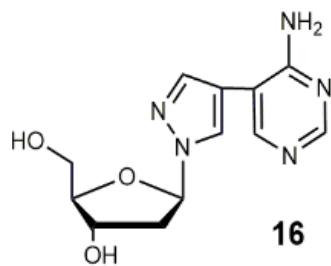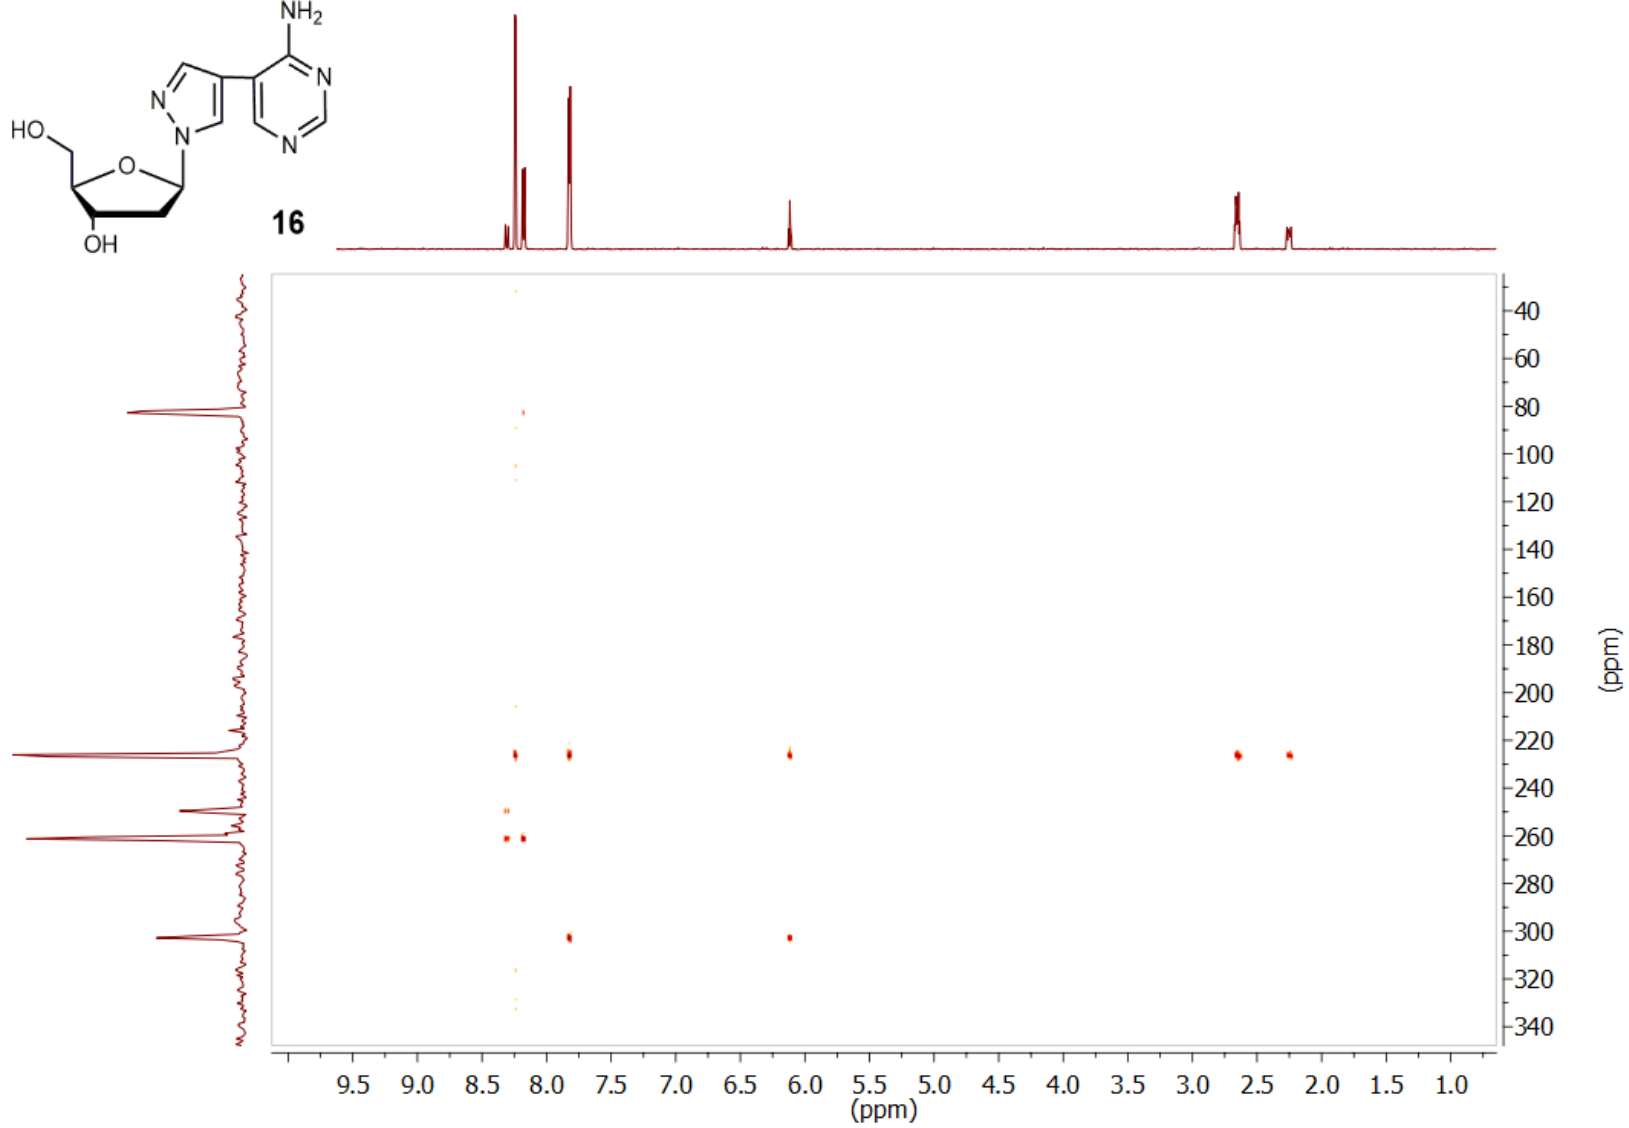

Superimposed  $^1\text{H}$ - $^{15}\text{N}$  spectra (700.2 MHz) of **16** in  $\text{DMSO-}d_6$



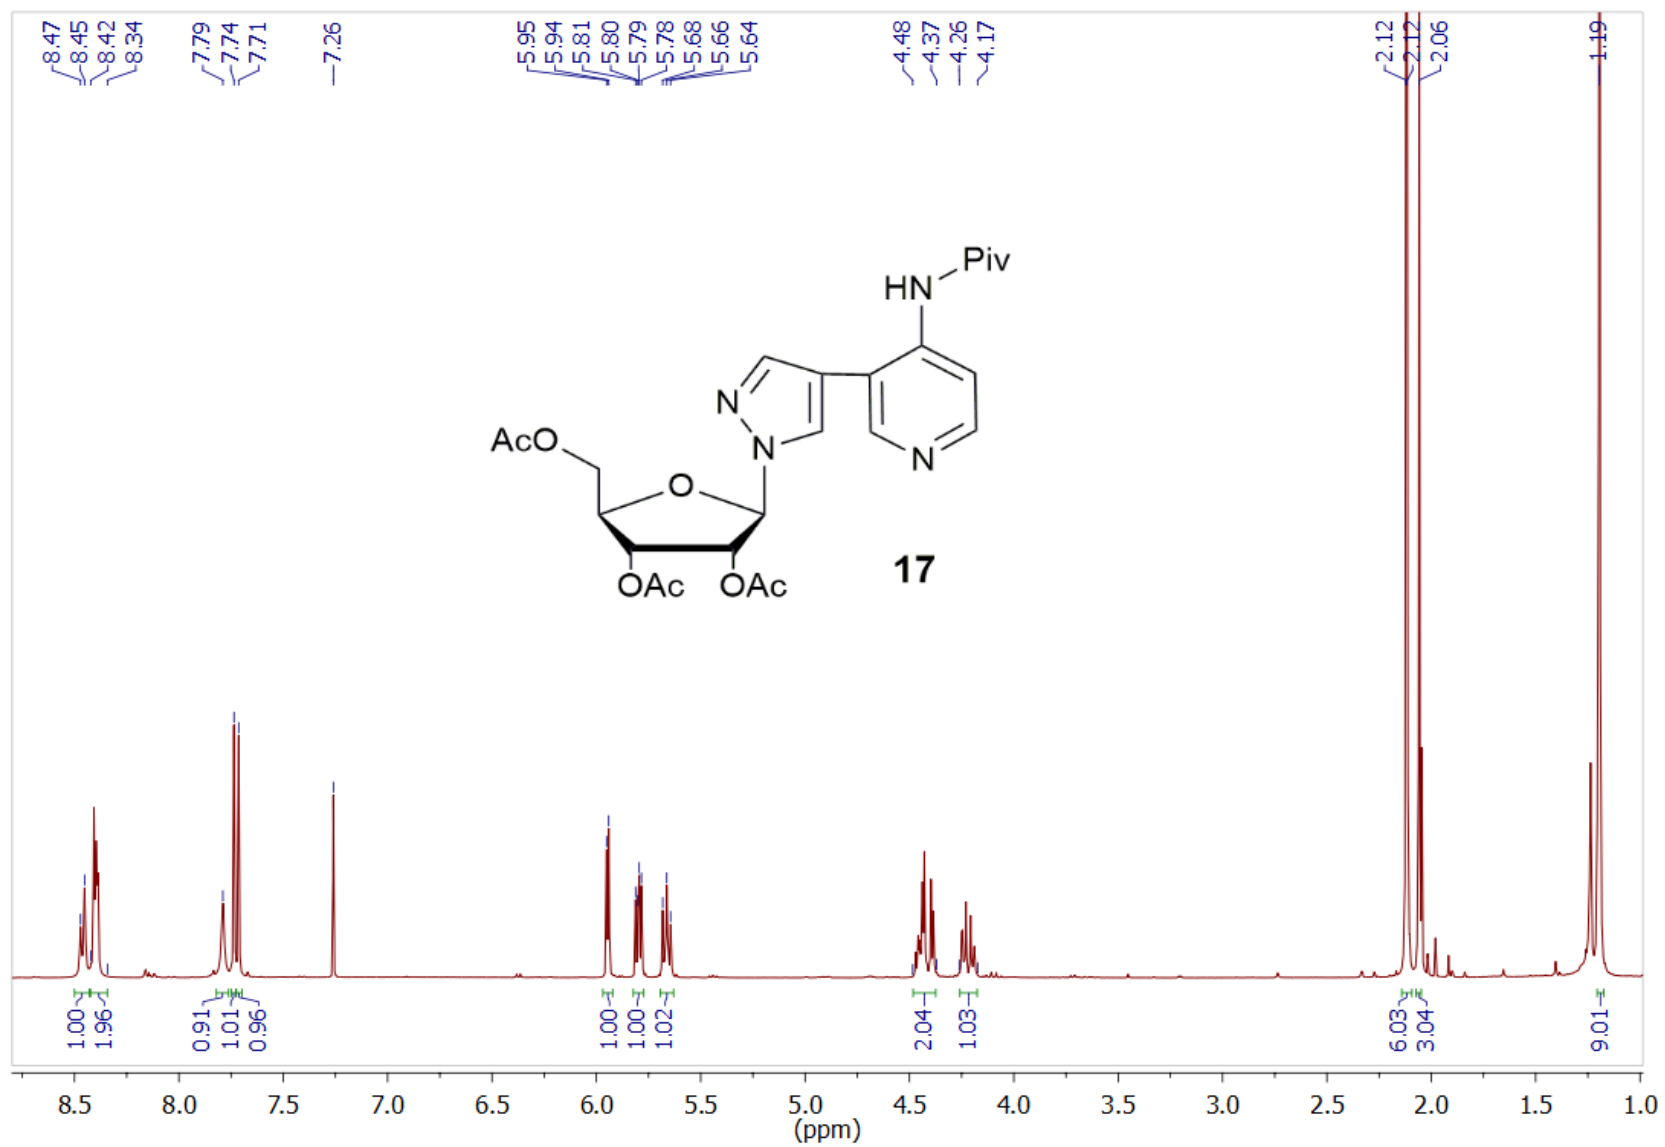

$^1\text{H}$  NMR spectrum (300.1 MHz) of **17** in  $\text{CDCl}_3$

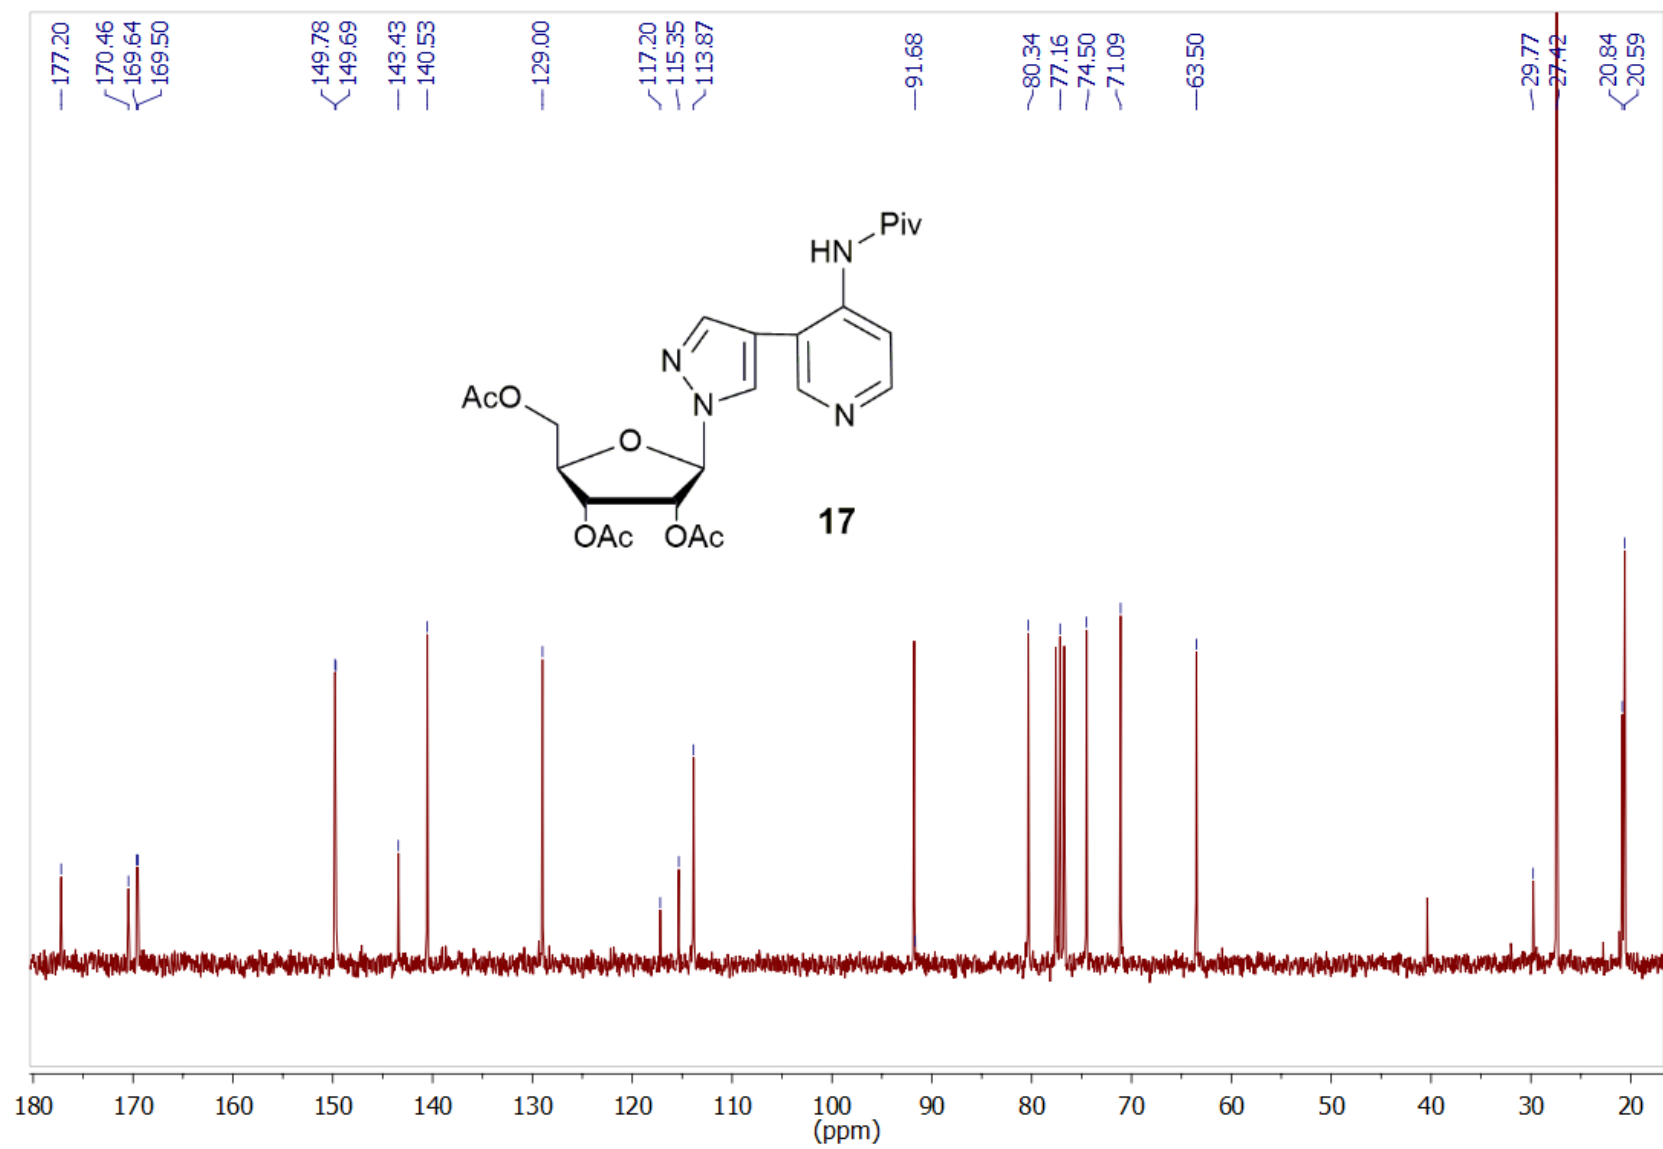

<sup>13</sup>C NMR spectrum (75.5 MHz) of **17** in DMSO-*d*<sup>6</sup>

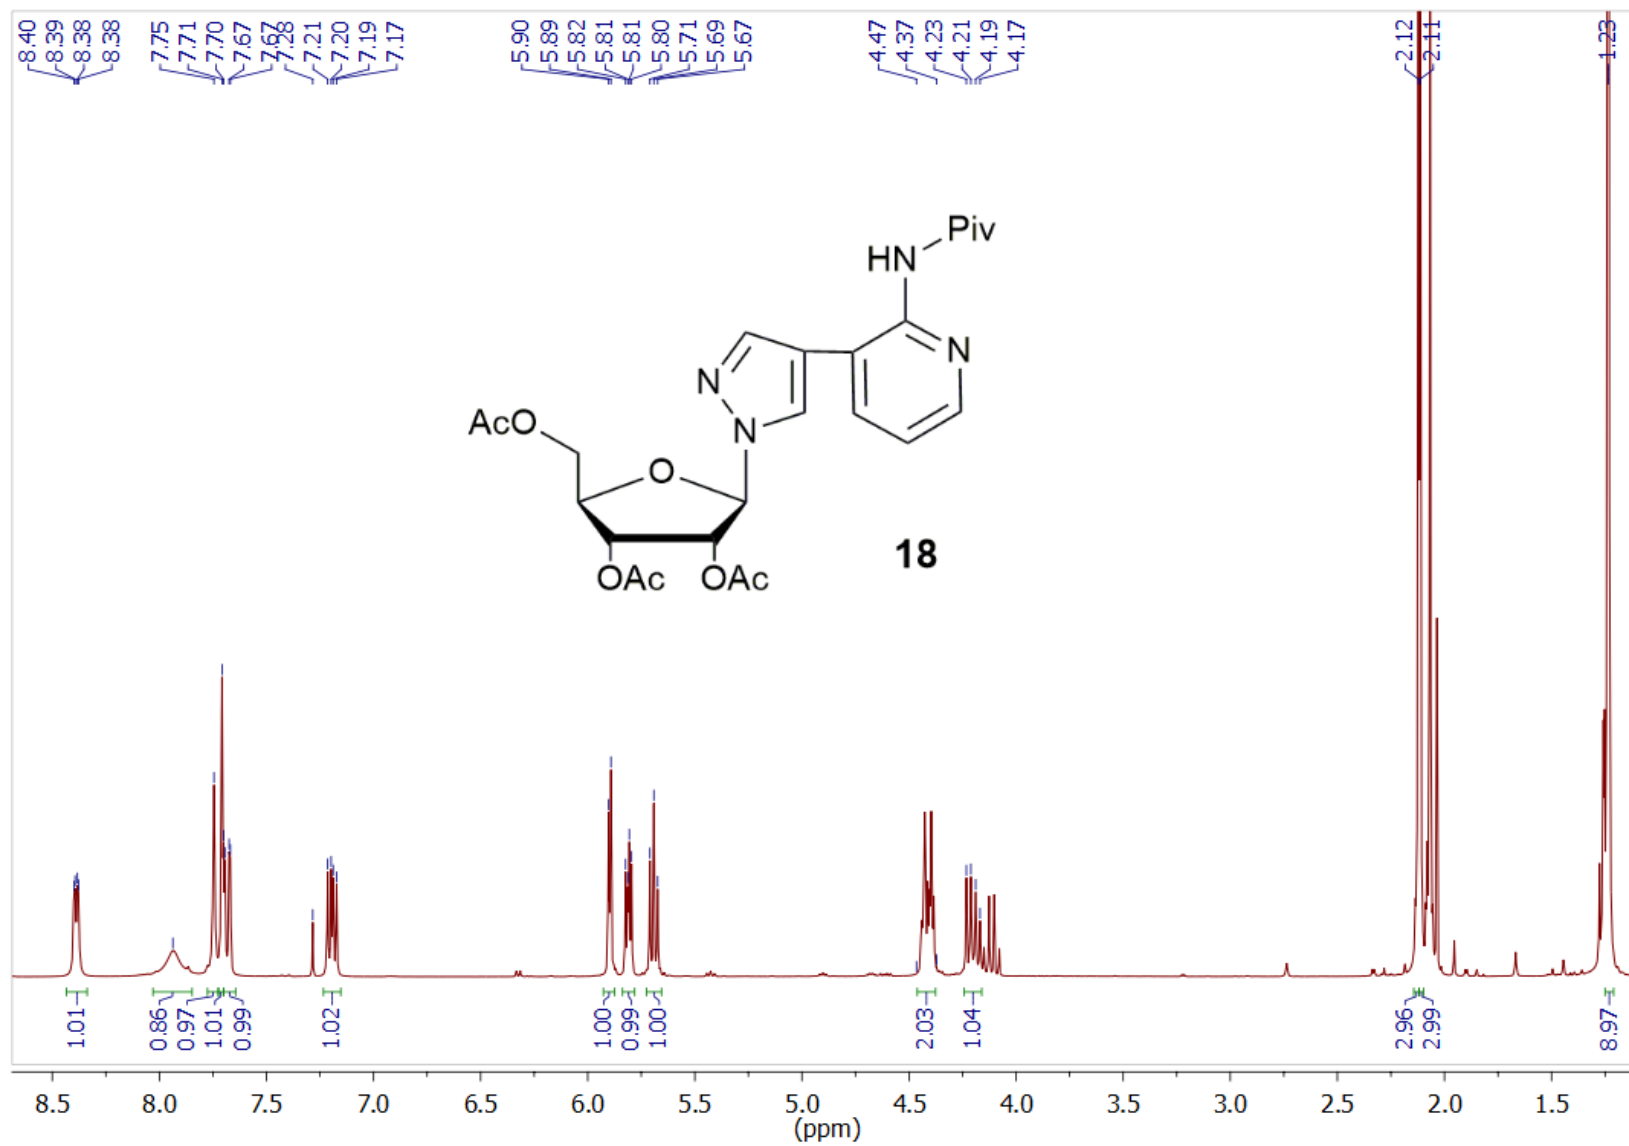

$^1\text{H}$  NMR spectrum (300.1 MHz) of **18** in  $\text{CDCl}_3$

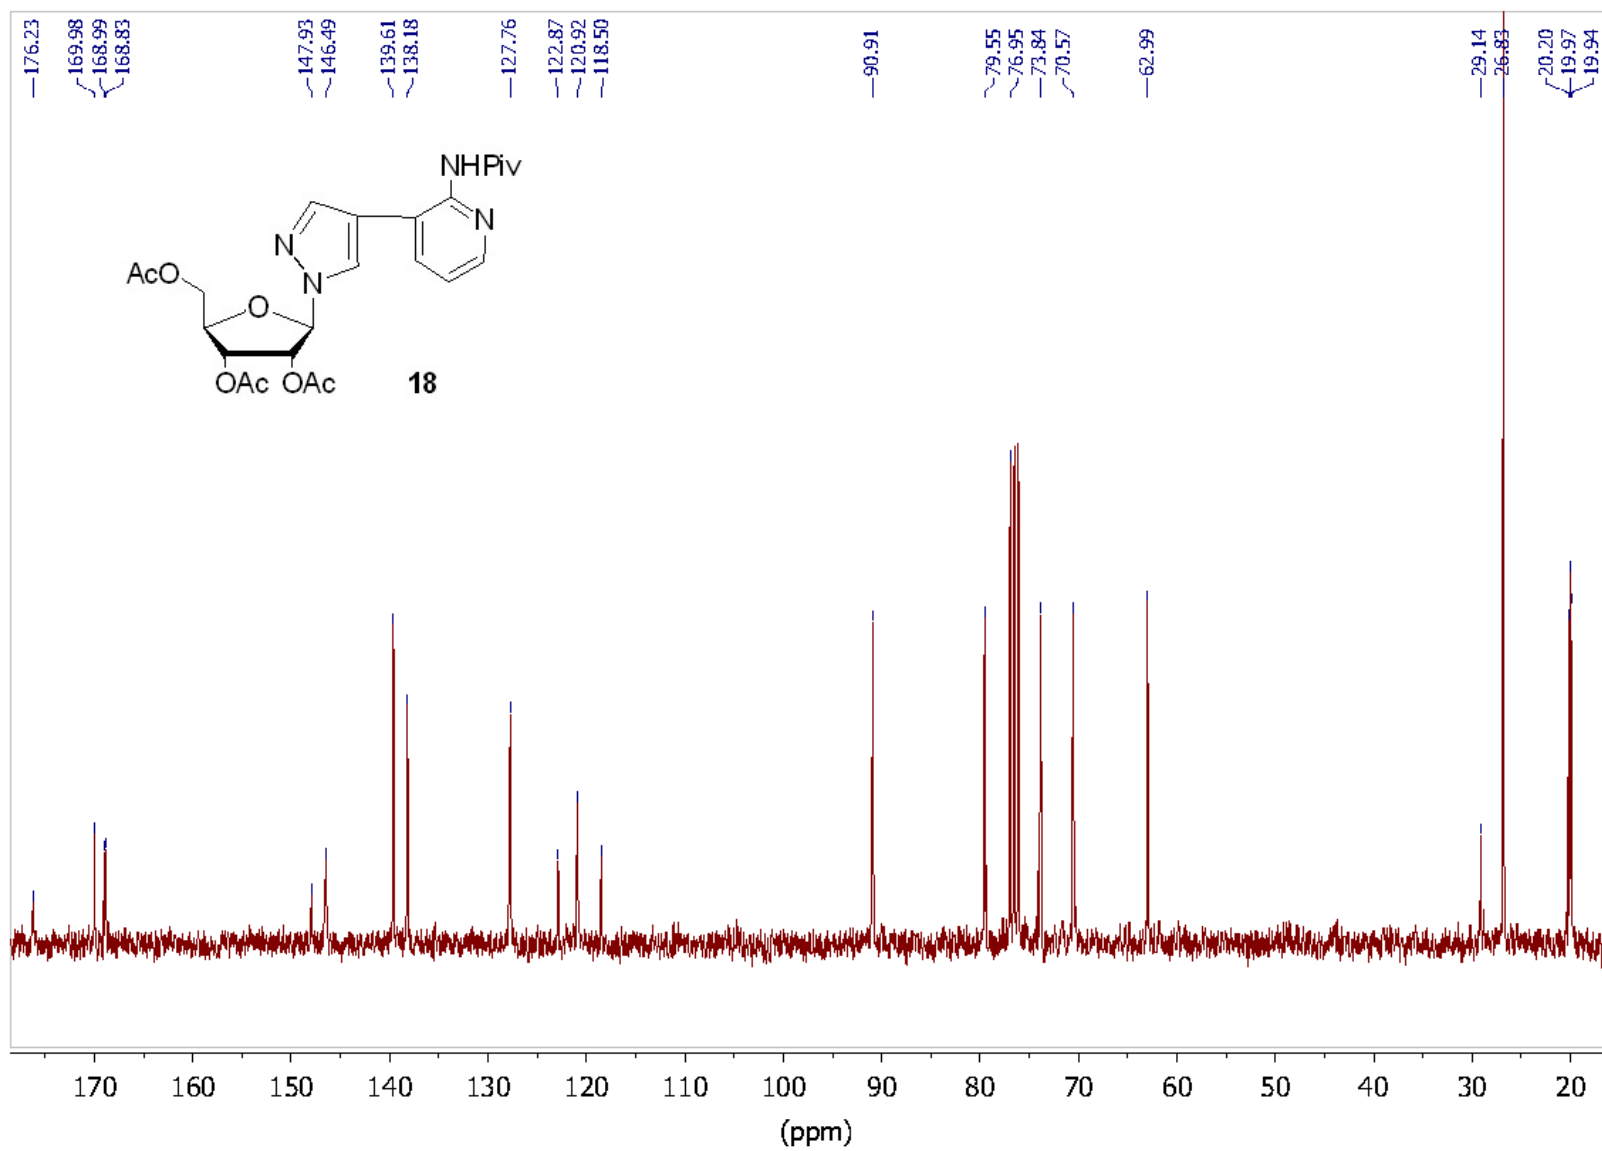

<sup>13</sup>C NMR spectrum (75.5 MHz) of **18** in CD<sub>3</sub>Cl<sub>3</sub>

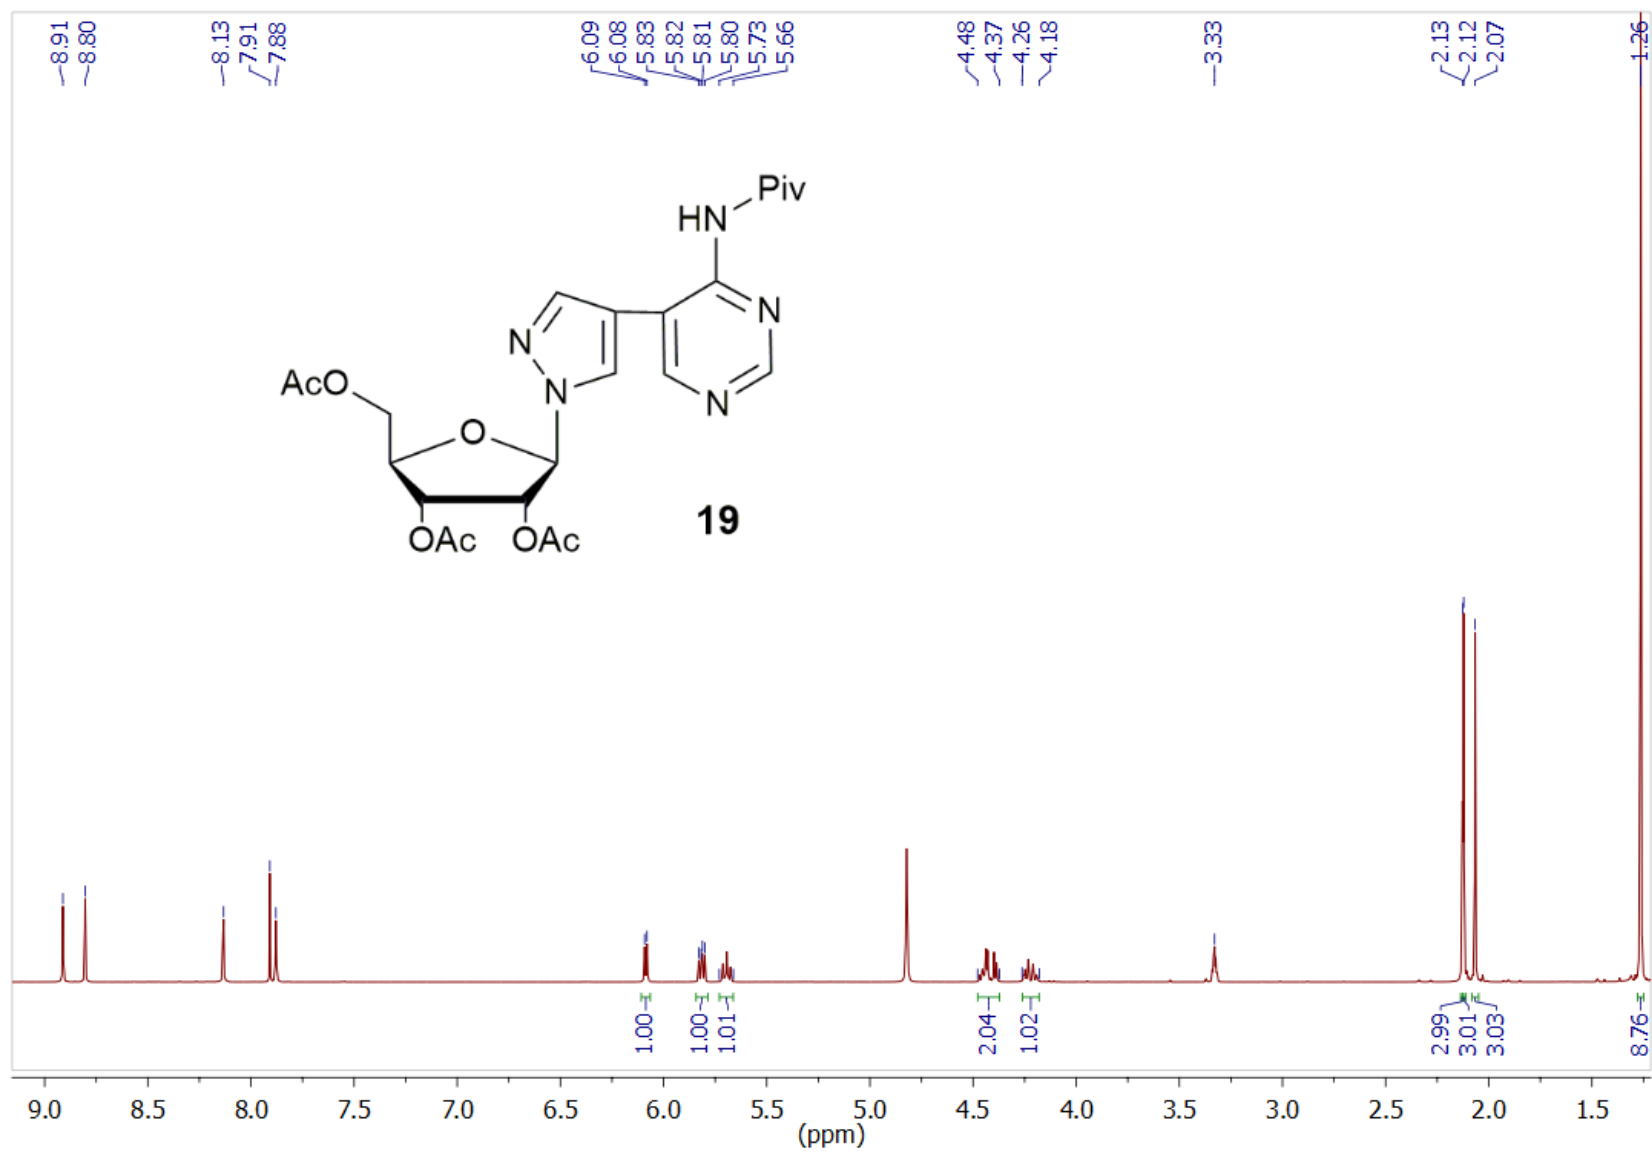

$^1\text{H}$  NMR spectrum (300.1 MHz) of **19** in  $\text{CD}_3\text{OD}$

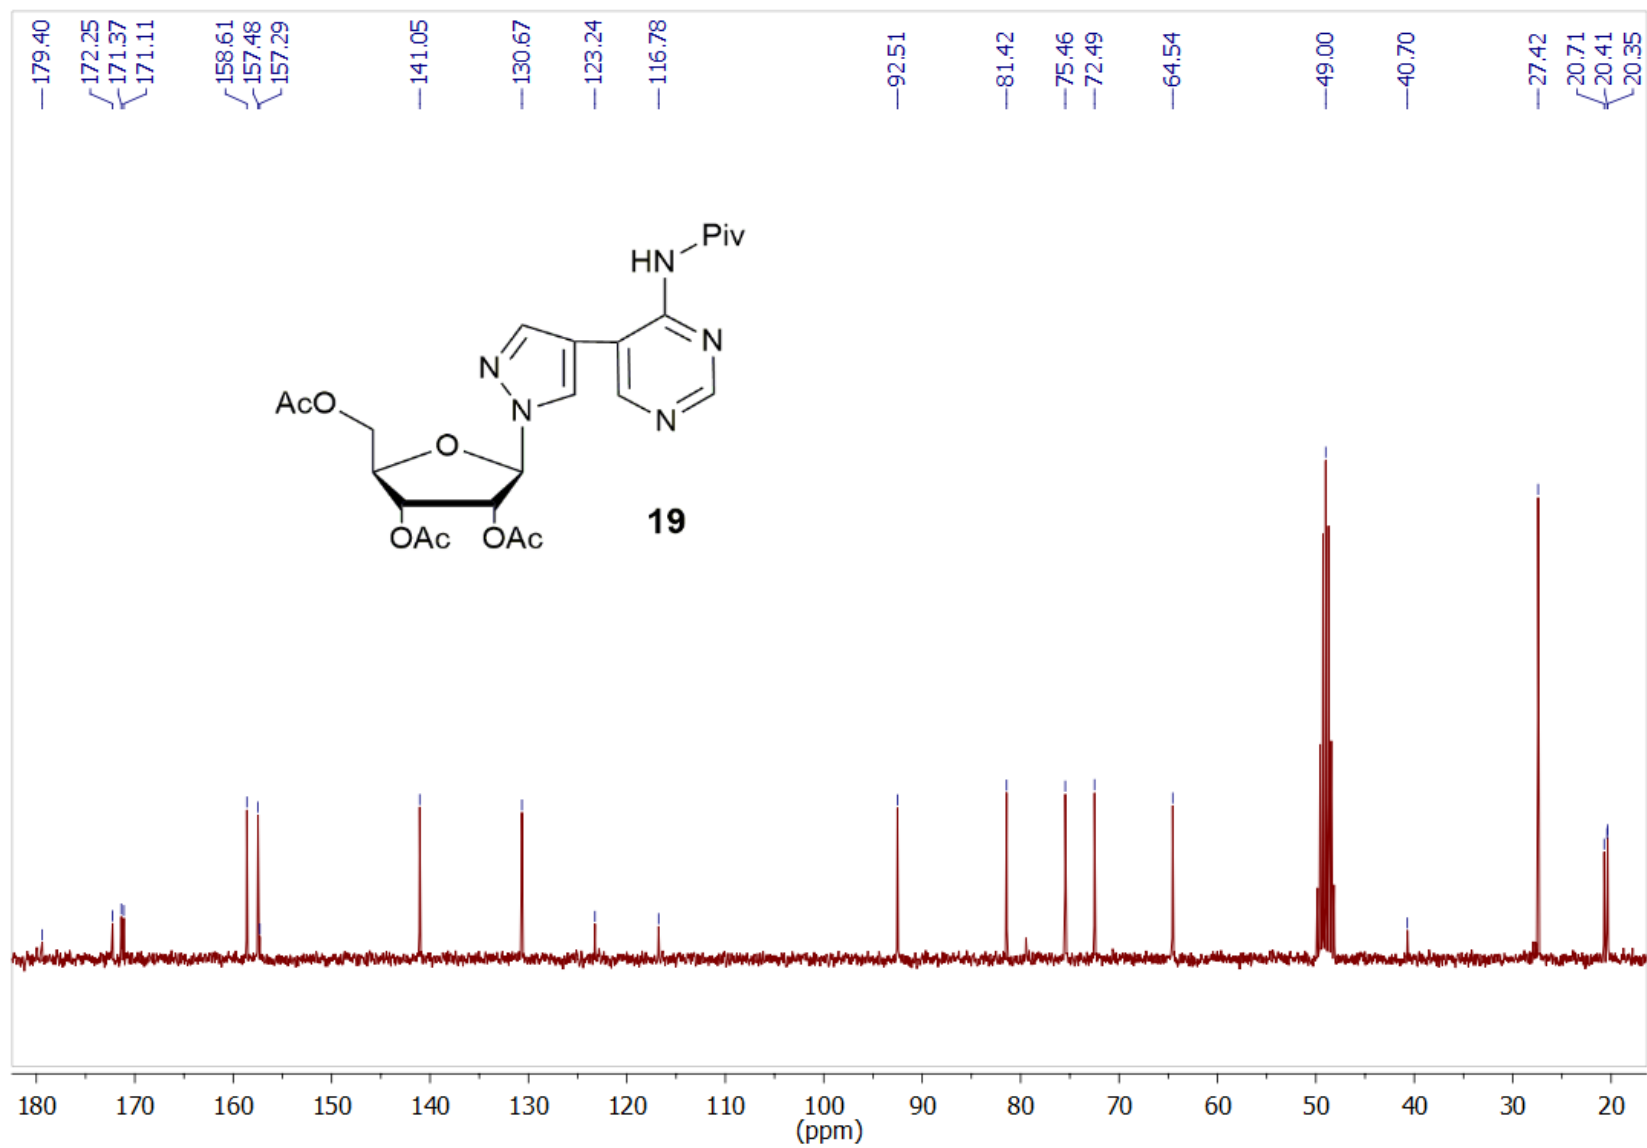

$^{13}\text{C}$  NMR spectrum (75.5 MHz) of **19** in  $\text{CD}_3\text{OD}$

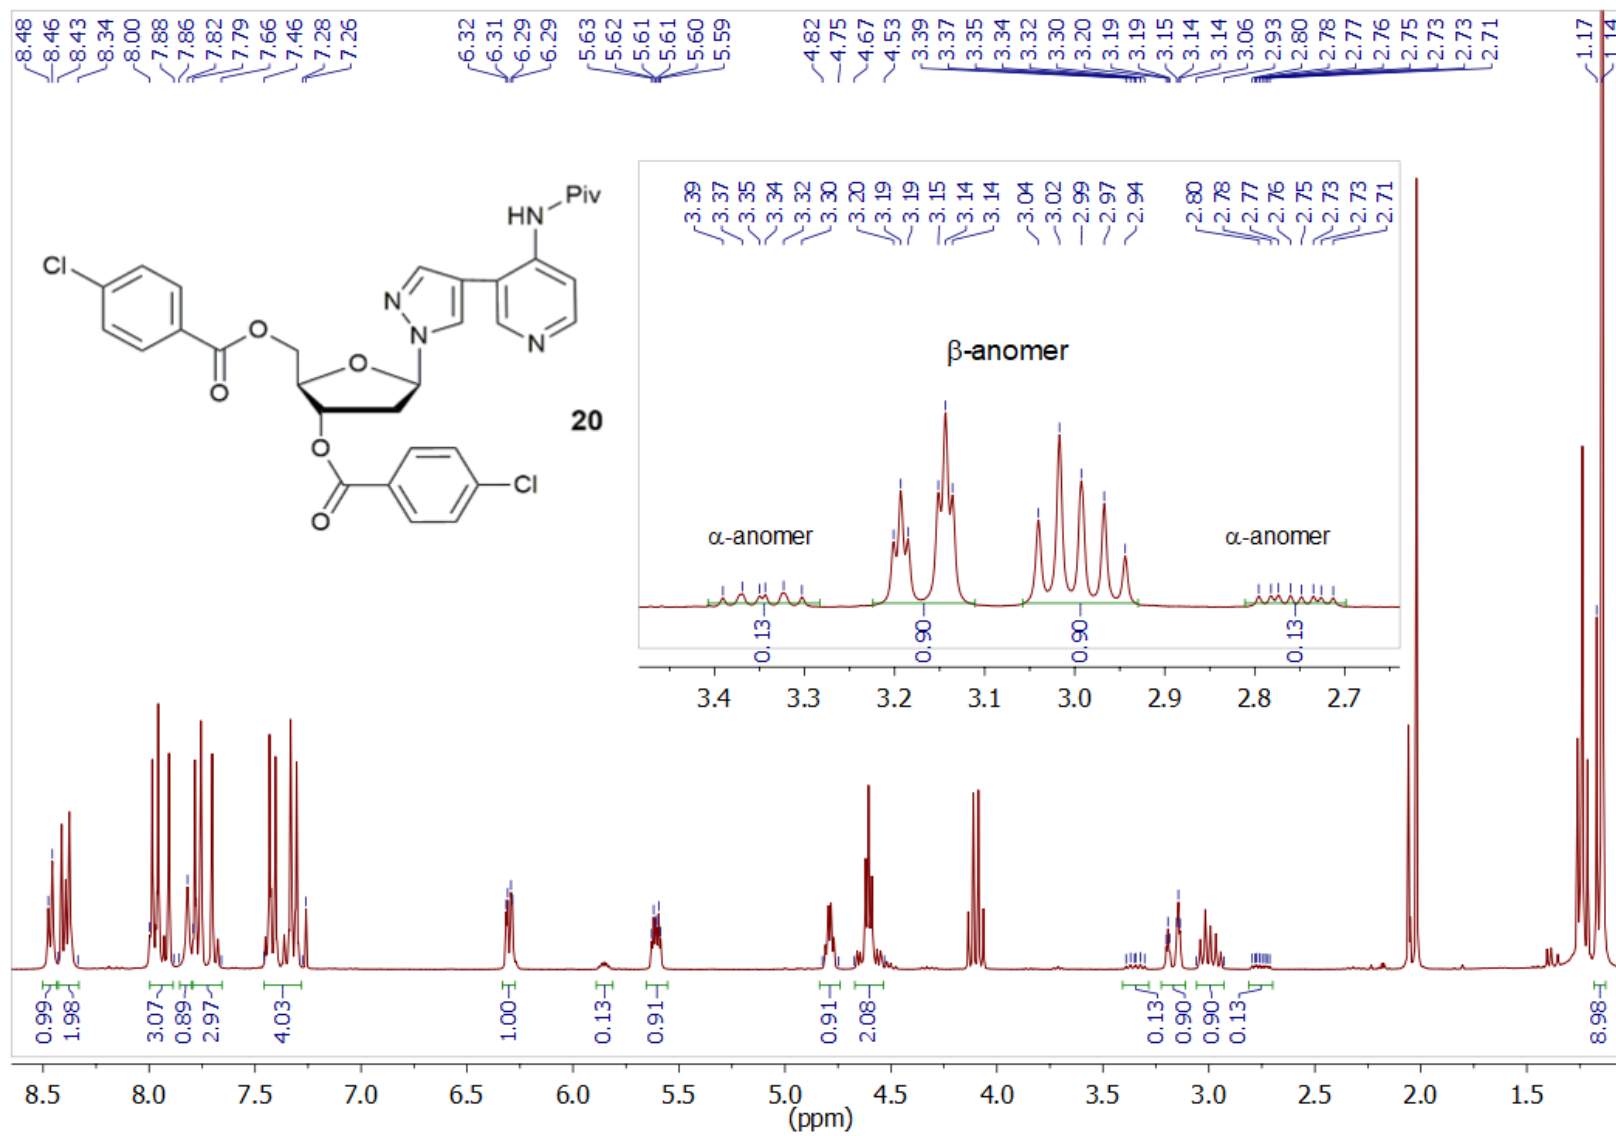

<sup>1</sup>H NMR spectrum (300.1 MHz) of **20** in CDCl<sub>3</sub>

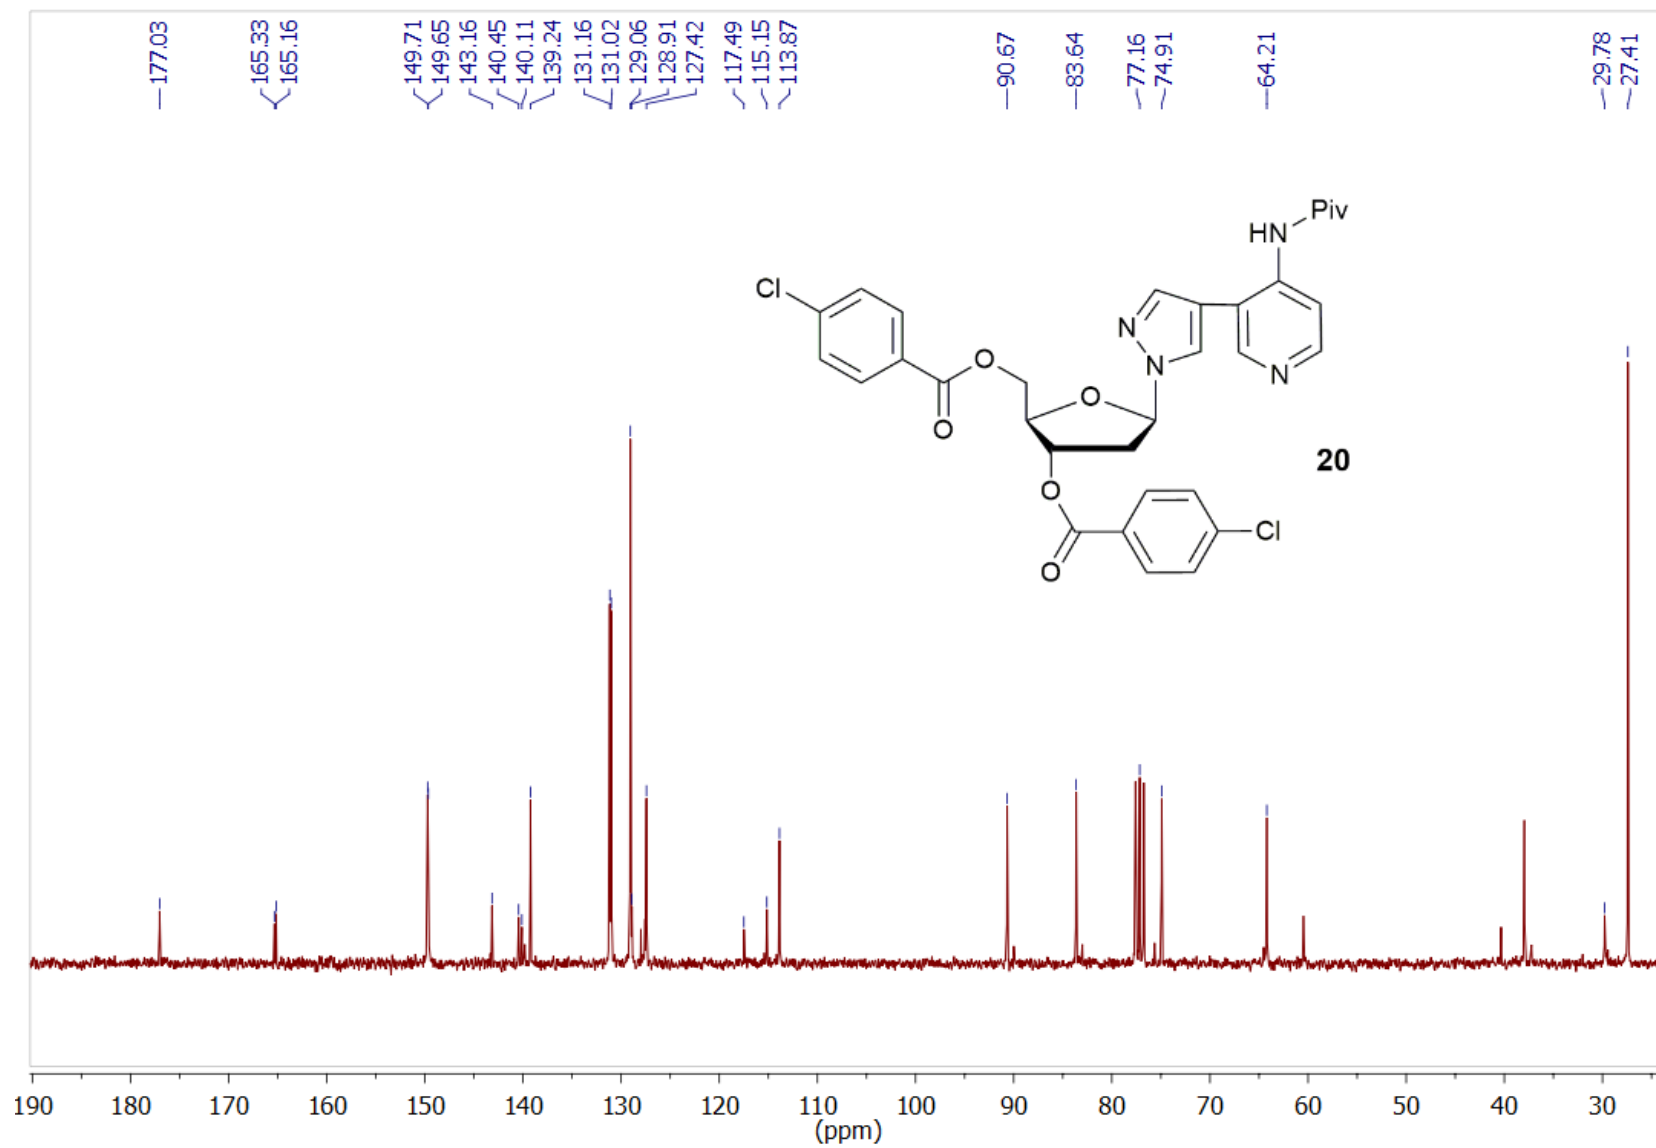

$^{13}\text{C}$  NMR spectrum (75.5 MHz) of **20** in  $\text{CDCl}_3$



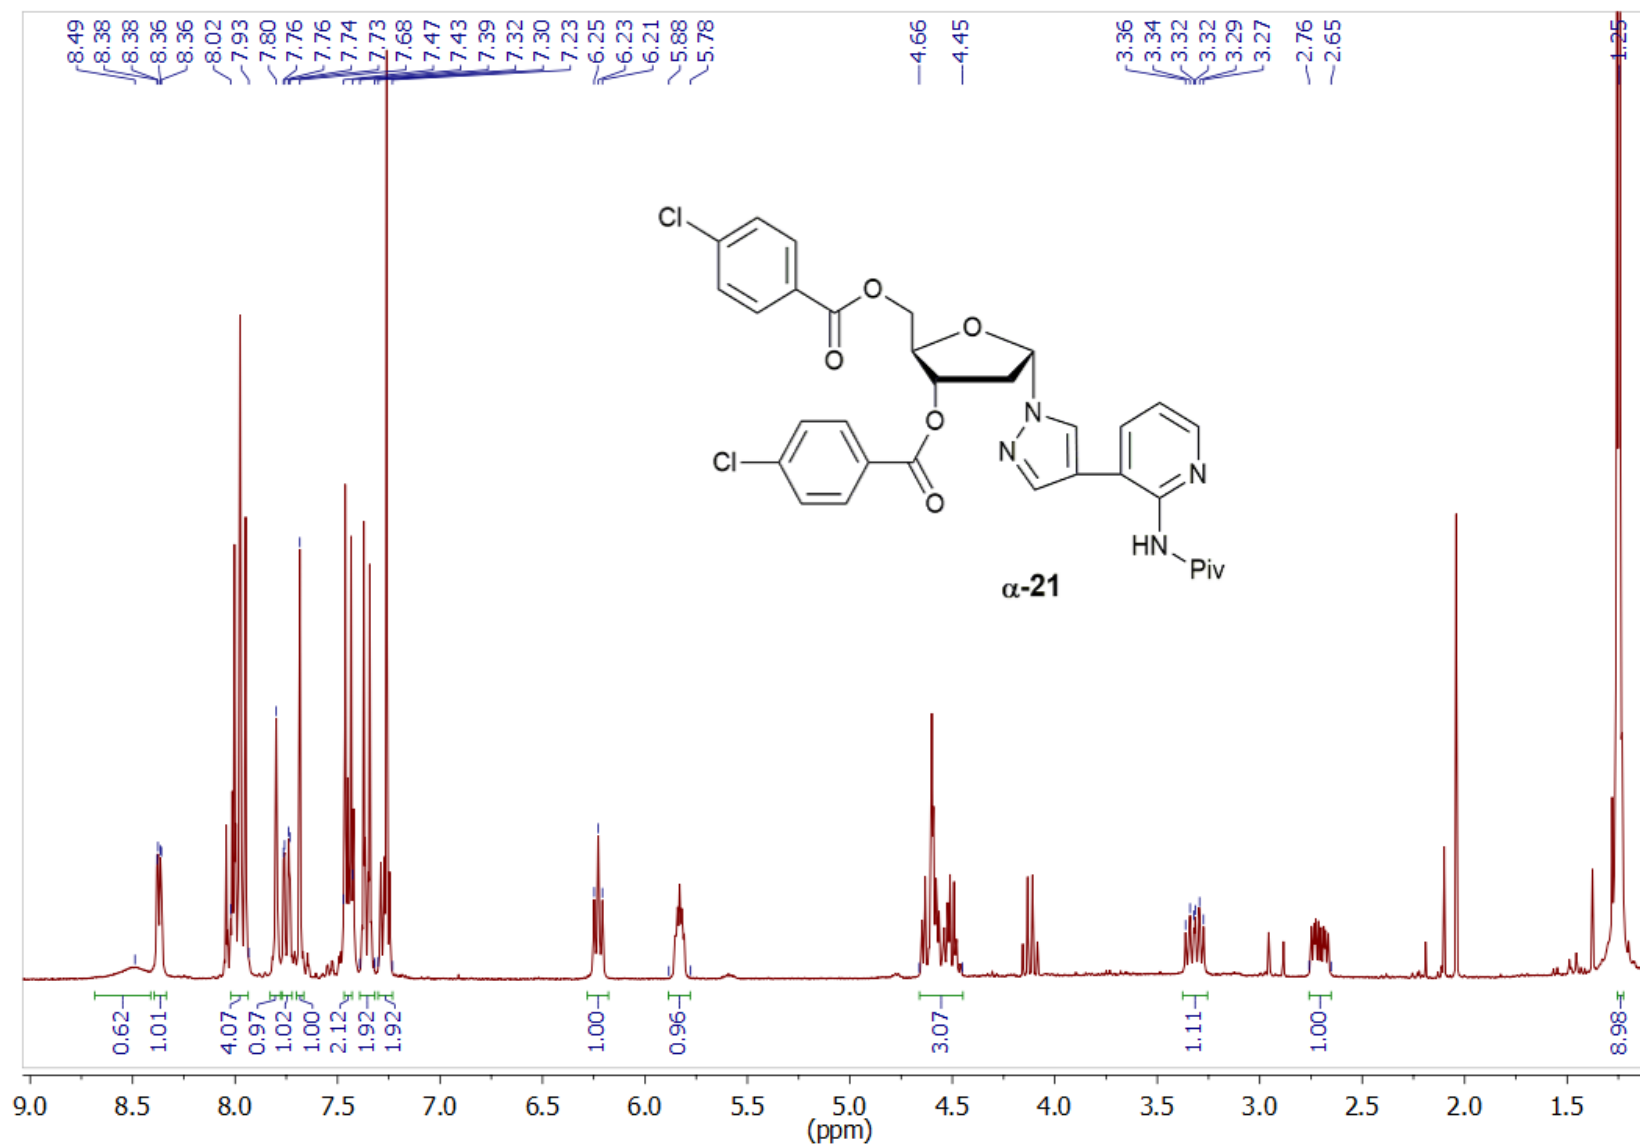

<sup>1</sup>H NMR spectrum (300.1 MHz) of **21 α-anomer** in CDCl<sub>3</sub>

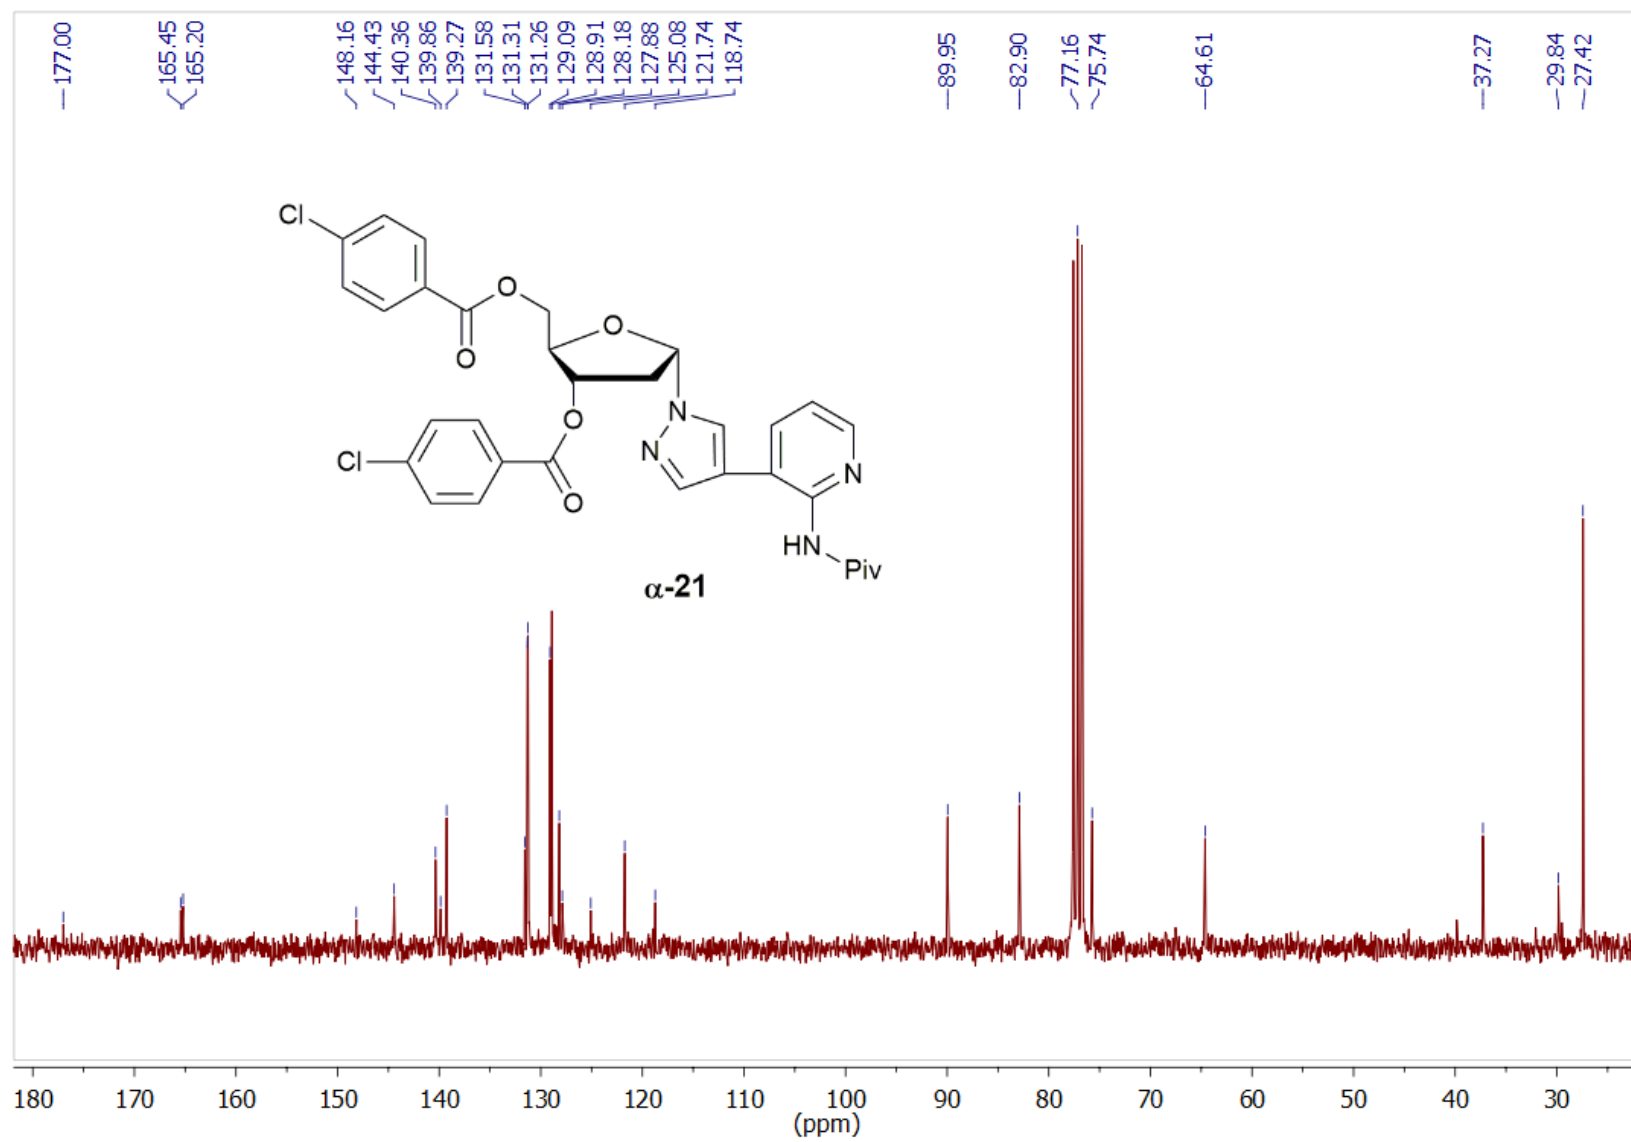

$^{13}\text{C}$  NMR spectrum (75.5 MHz) of **21  $\alpha$ -anomer** in  $\text{CDCl}_3$

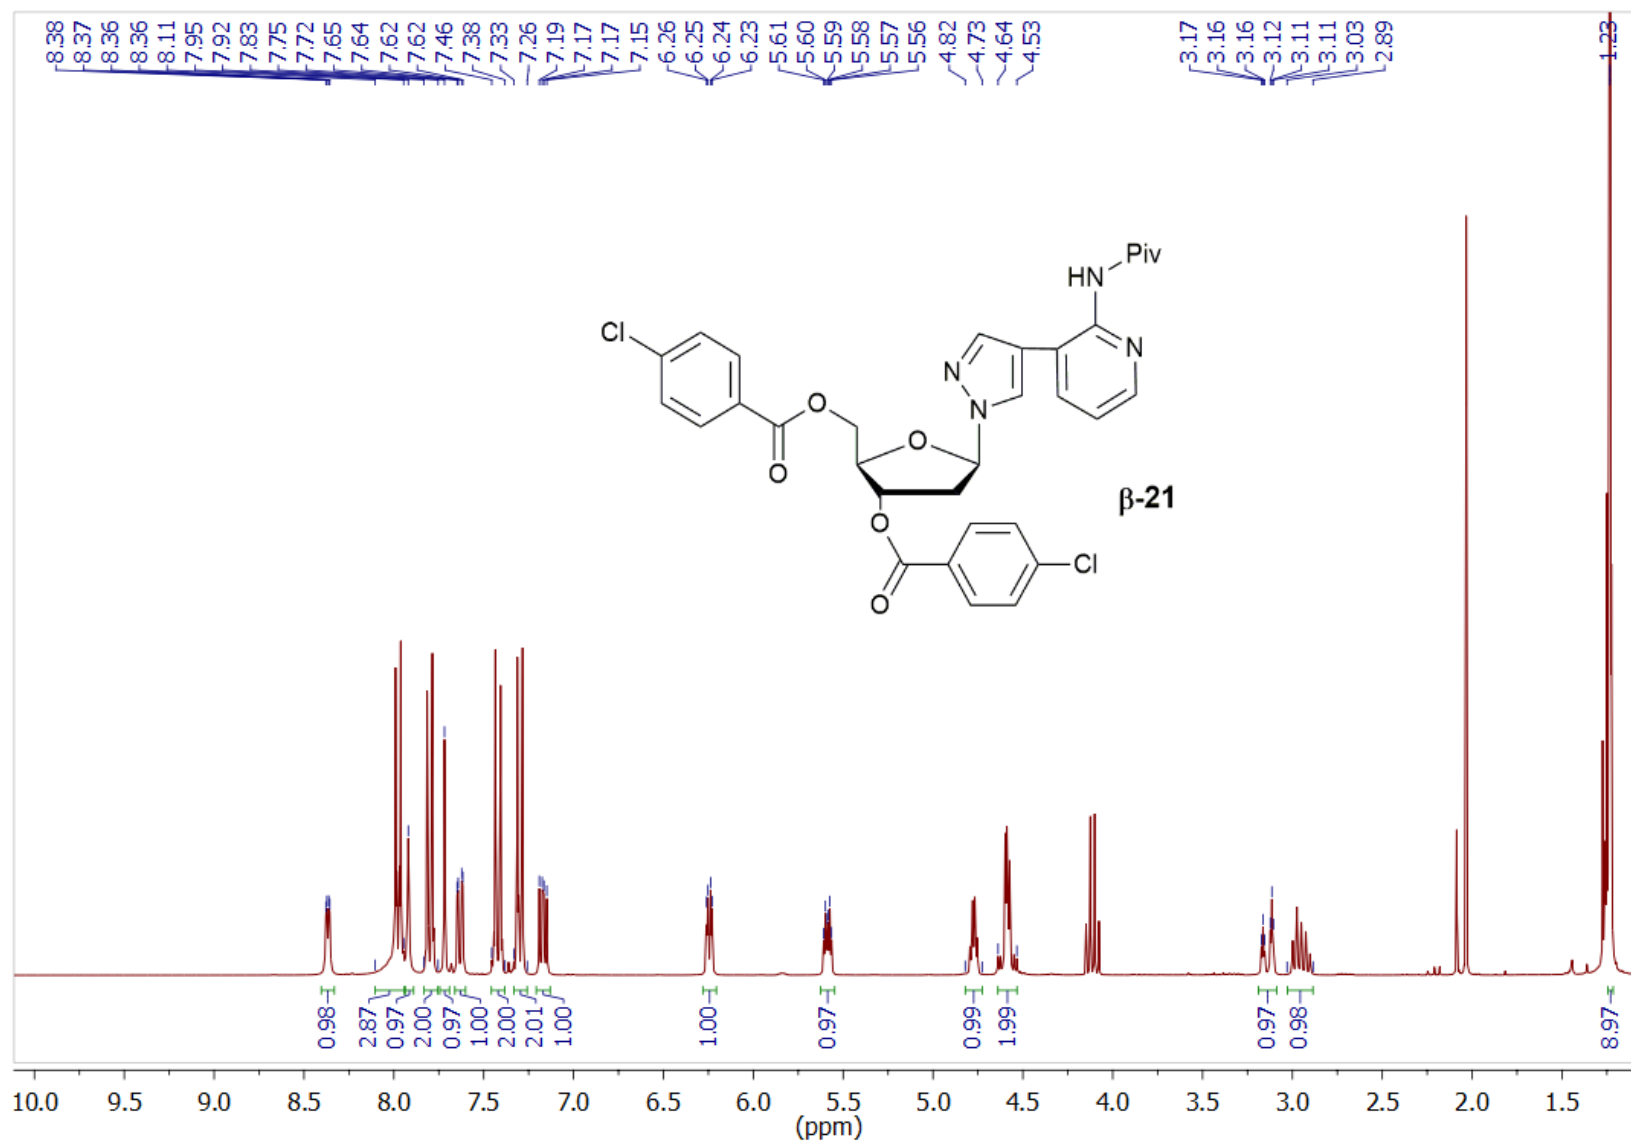

<sup>1</sup>H NMR spectrum (300.1 MHz) of **21** β-anomer in CDCl<sub>3</sub>

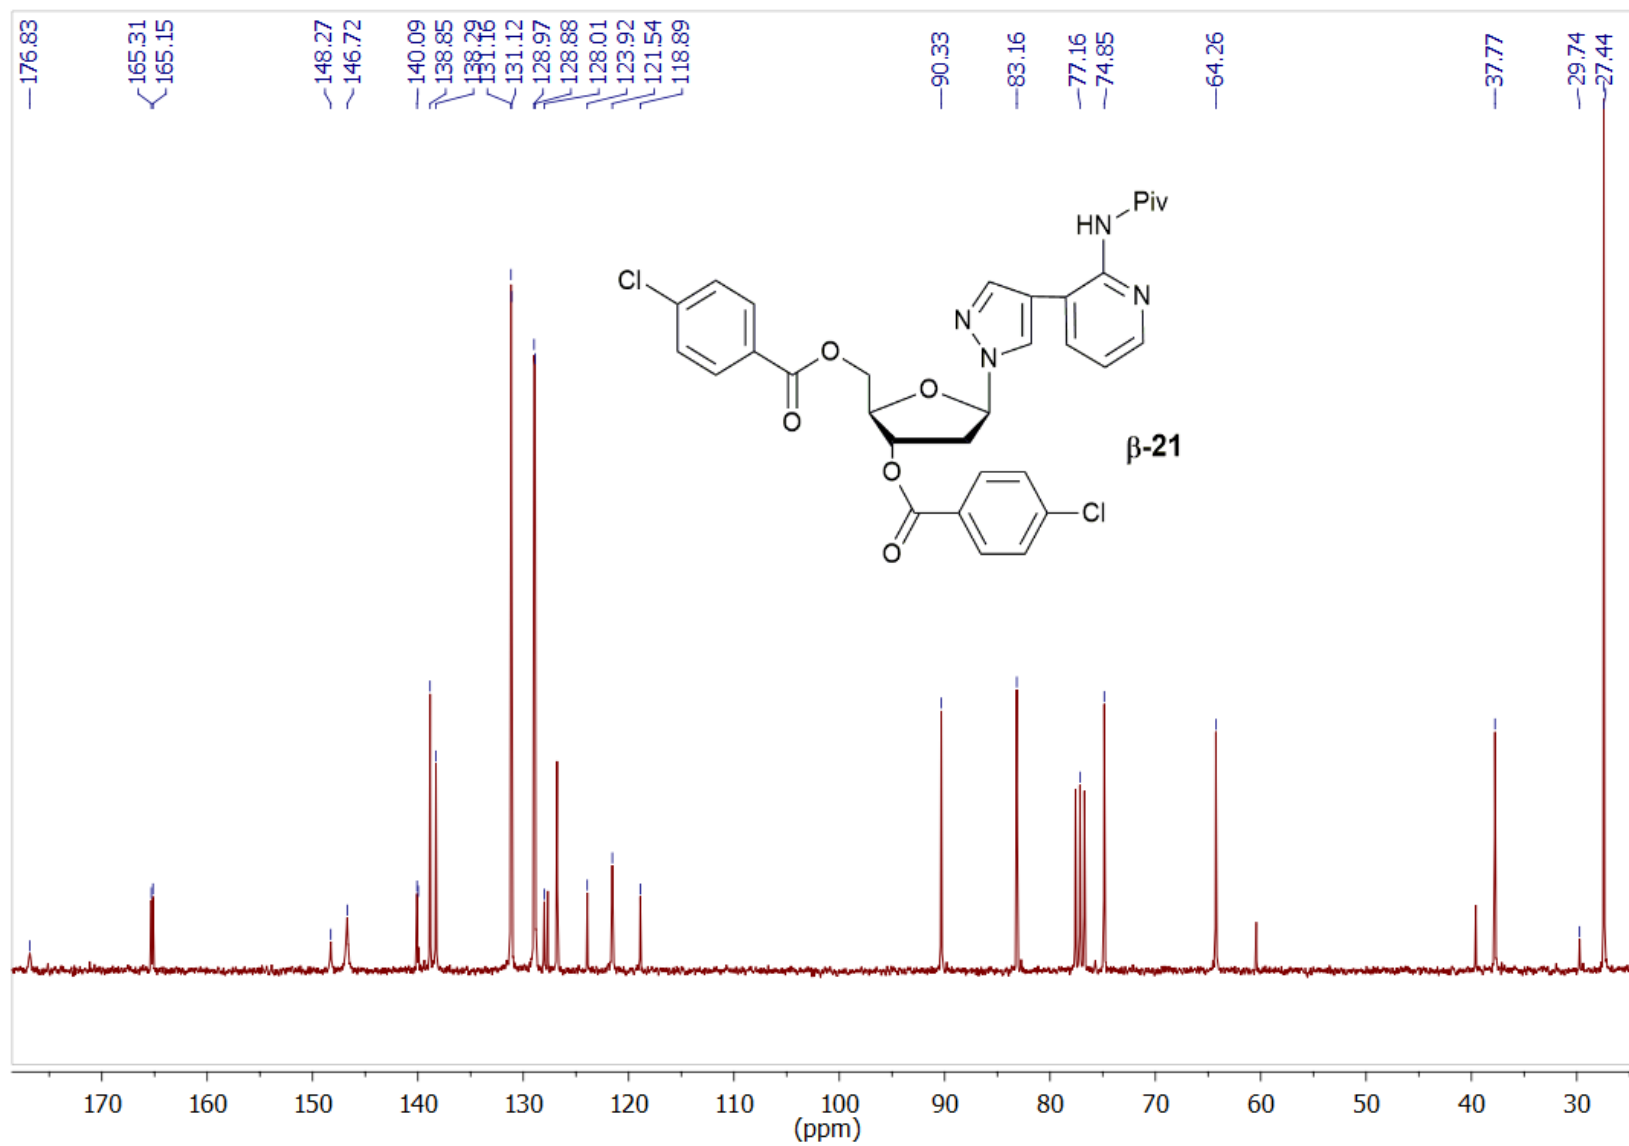

<sup>13</sup>C NMR spectrum (75.5 MHz) of **21** β-anomer in CDCl<sub>3</sub>

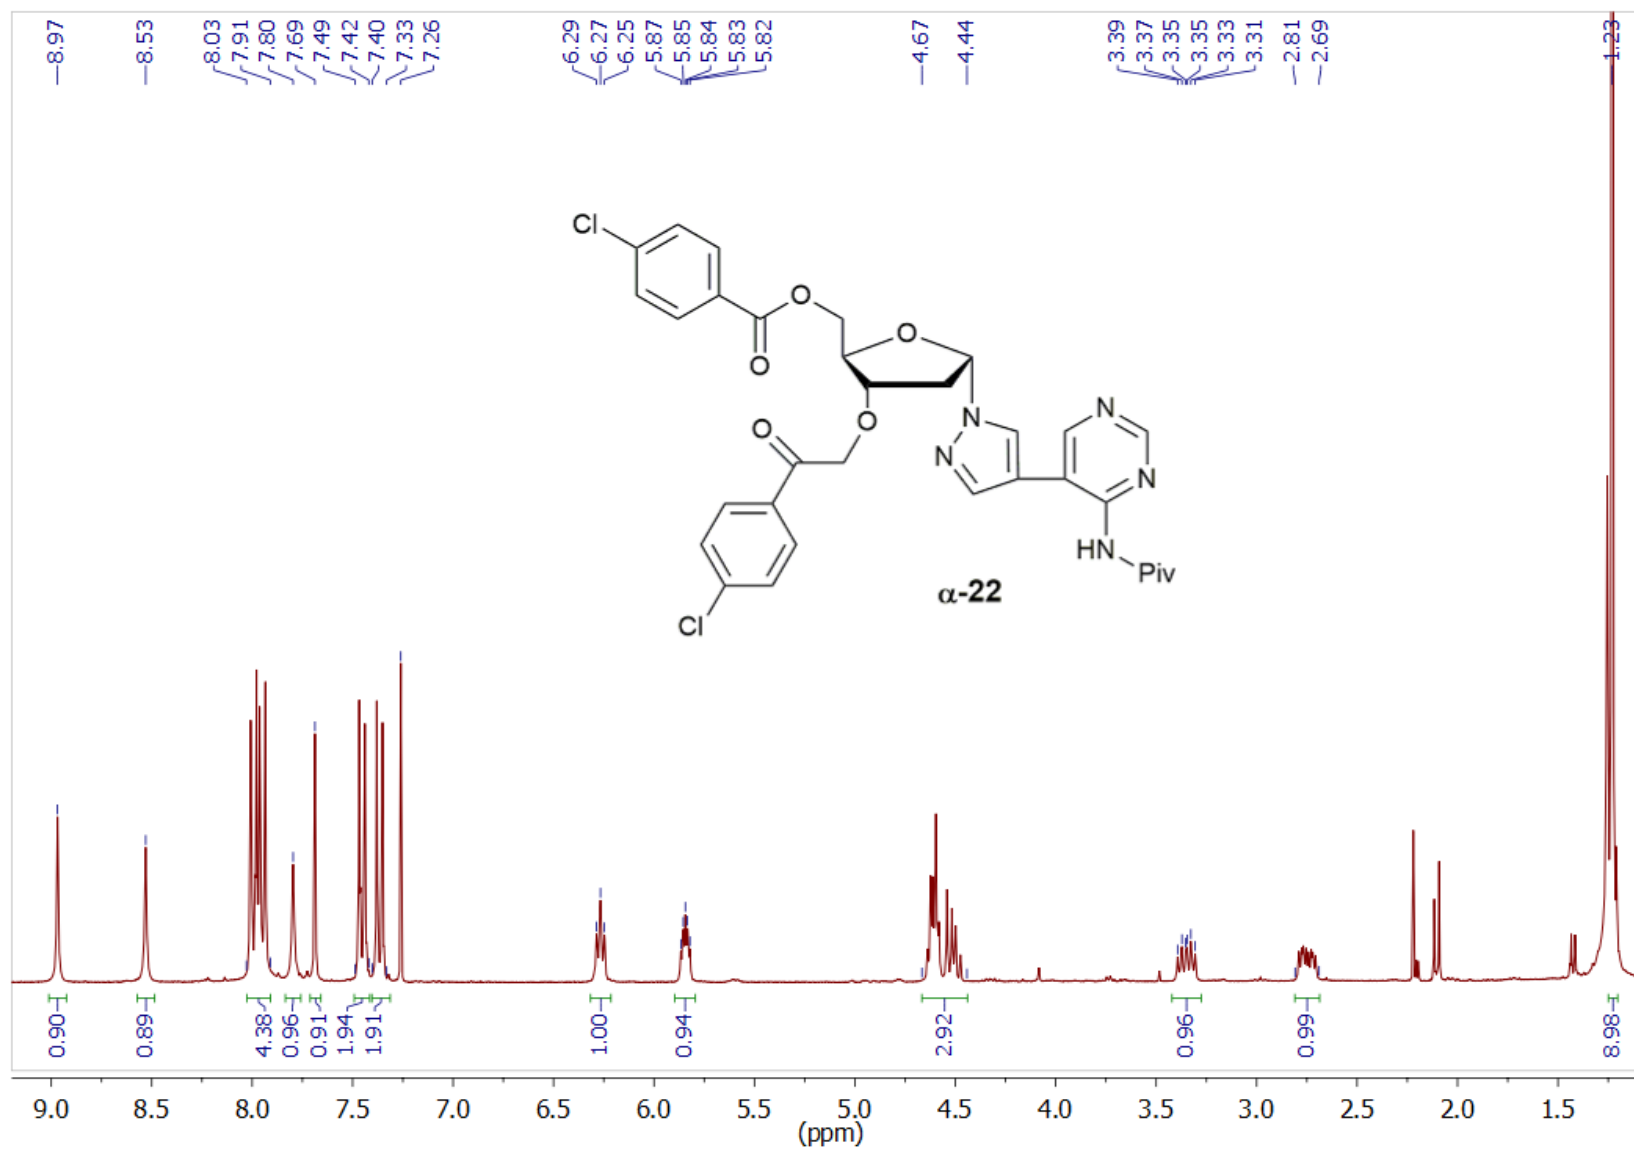

<sup>1</sup>H NMR spectrum (300.1 MHz) of **22** α-anomer in CDCl<sub>3</sub>

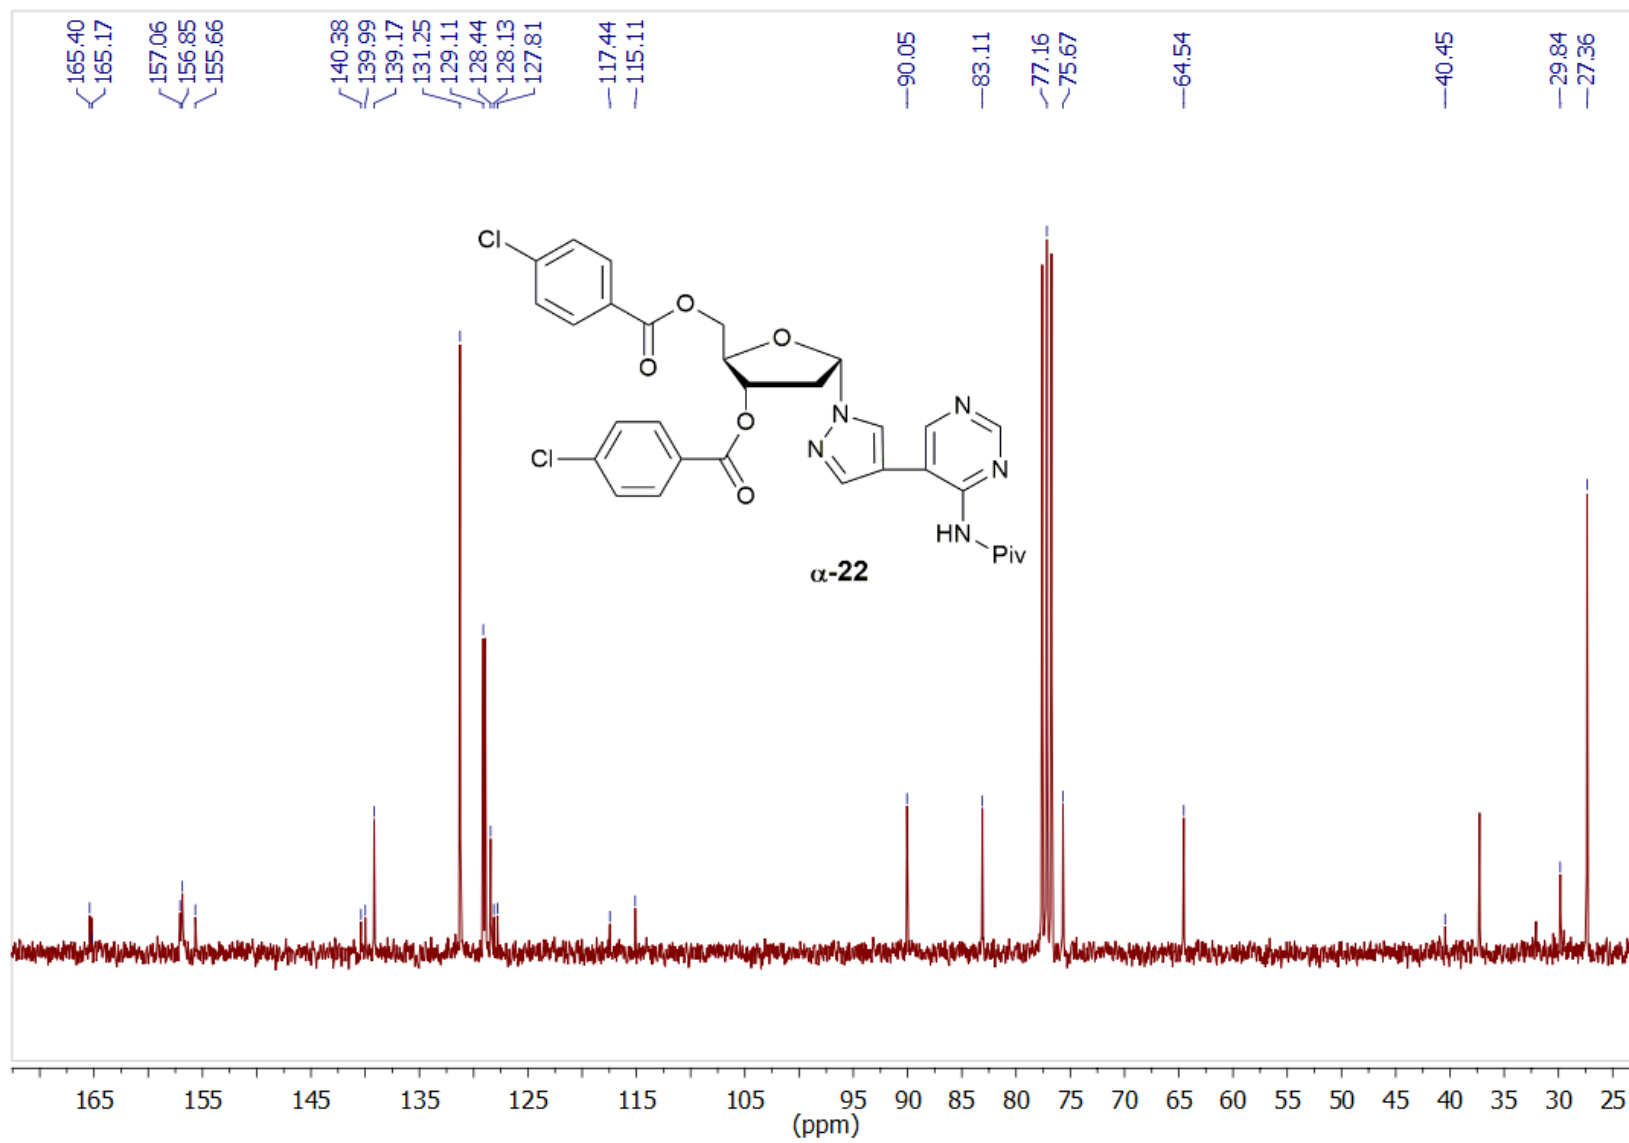

<sup>13</sup>C NMR spectrum (75.5 MHz) of **22** α-anomer in CDCl<sub>3</sub>

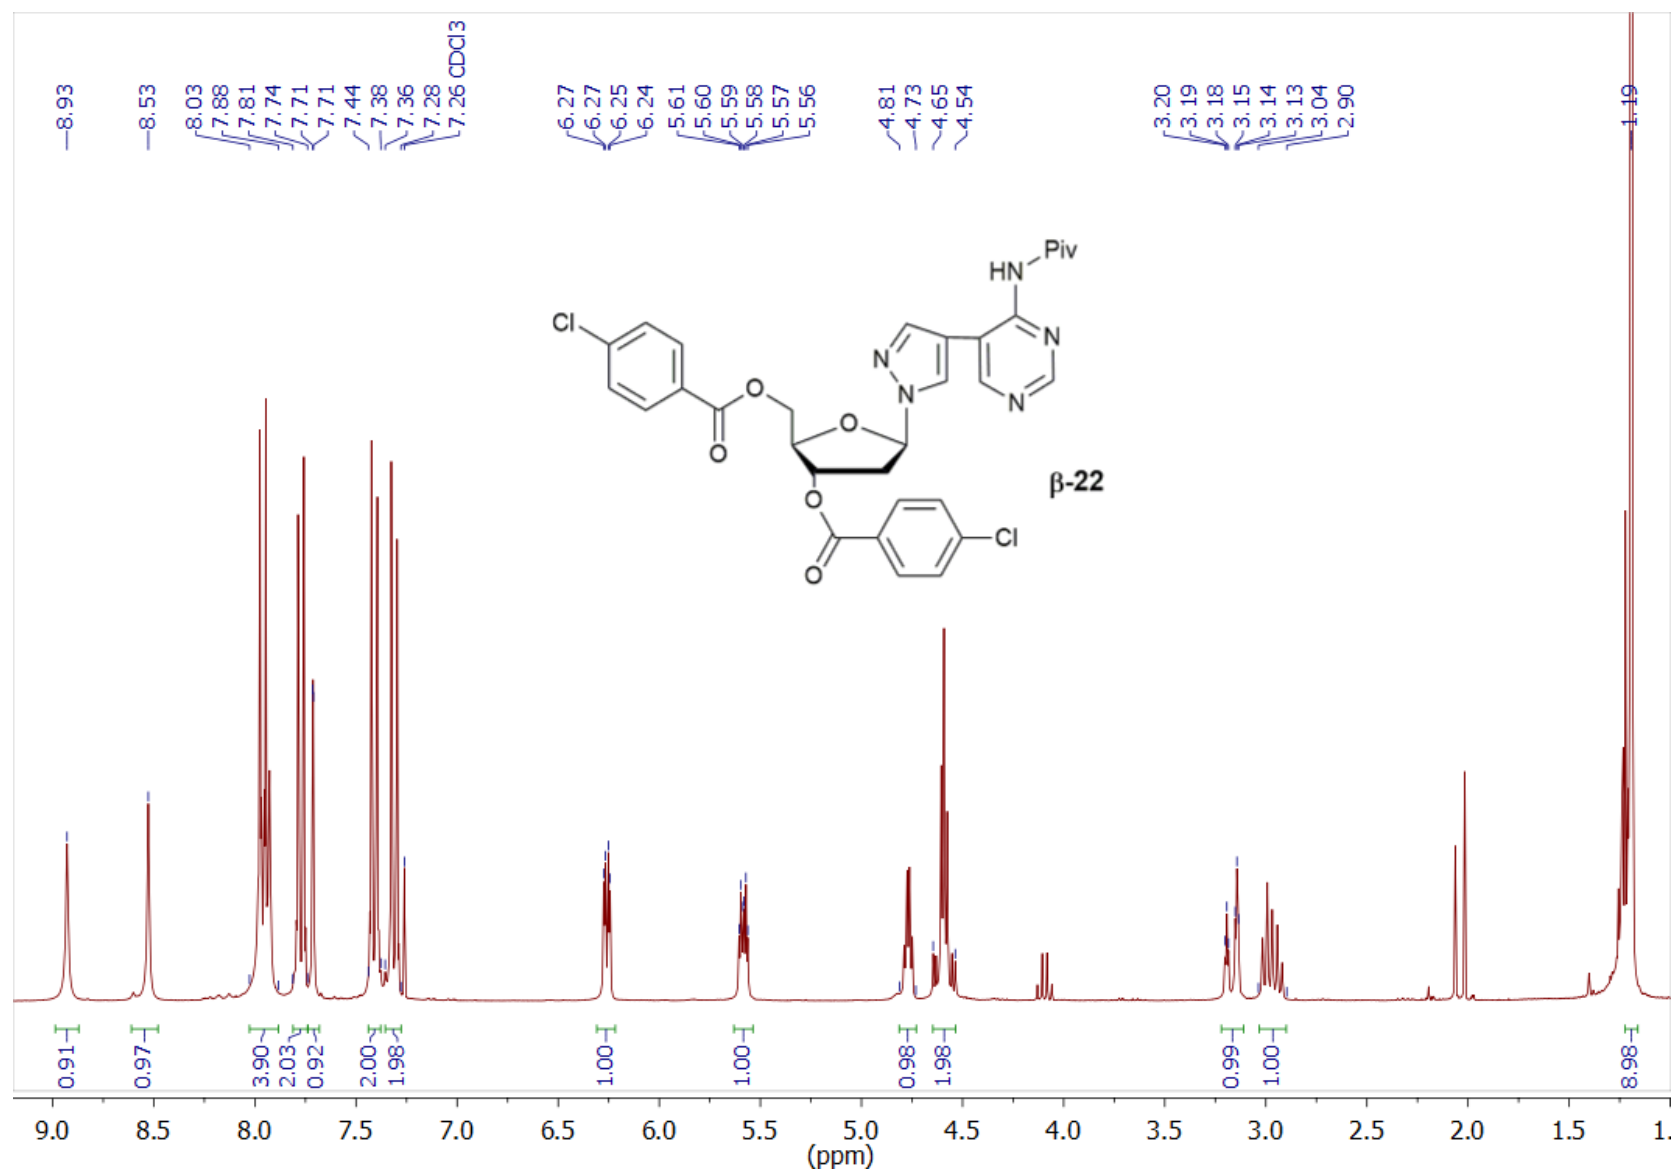

<sup>1</sup>H NMR spectrum (300.1 MHz) of **22** β-anomer in CDCl<sub>3</sub>
